# Supplementary material for: A Comparison of Brain Gene Expression Levels in Domesticated and Wild Animals
Source: PLoS Genet. 2012 Sep 27;8(9):e1002962. doi: 10.1371/journal.pgen.1002962 (PMC3459979; doi:10.1371/journal.pgen.1002962)
Supplement: Dataset S1 — Full details on samples and sequencing runs performed for this study. (XLS) [file pgen.1002962.s001.xls]

## Sheet: Sheet1
Sample ID	Species	Group	Sex	Source	RIN	library type	reads after quality filtering and merging	mapped reads	mapped reads (%)	notes
Dog_J1	Canis familiaris	domestic	f	Veterinary practice, Leipzig, Germany	9.6	PE51	21681694	19483157	0.898599
Dog_J2	Canis familiaris	domestic	m	Veterinary practice, Leipzig, Germany	9.6	PE51	17367938	15979046	0.920031
Dog_J3	Canis familiaris	domestic	m	Veterinary practice, Leipzig, Germany	9.1	PE51	15978210	14812196	0.927025
Dog_J4	Canis familiaris	domestic	f	Veterinary practice, Leipzig, Germany	8.8	PE51	20632253	18353231	0.889541
Dog_T1	Canis familiaris	domestic	m	Animal shelter, Leipzig, Germany	9.3	PE51	21022166	18210587	0.866256
Wolf_Conny	Canis lupus	wild	m	Tierpark Hanau, Germany	8.5	PE51	21400074	18859293	0.881272
Wolf_K1	Canis lupus	wild	f	Zoo Kiel, Germany	good RNA on gel	PE51	21860980	19764272	0.904089
Wolf_K3	Canis lupus	wild	f	Zoo Kiel, Germany	8	PE51	18597874	16604688	0.892827
Wolf_O1	Canis lupus	wild	m	Tier- und Naturpark Schloss Herberstein, Austria	9.3	PE51	20069118	17001696	0.847157
Wolf_O2	Canis lupus	wild	m	Tier- und Naturpark Schloss Herberstein, Austria	9.3	PE51	16250247	14972535	0.921373
Wolf_O3	Canis lupus	wild	m	Tier- und Naturpark Schloss Herberstein, Austria	9.5	PE51	21544048	19062598	0.88482
boar_1	Sus scrofa	wild	f	Commercial farm, Sweden	8.8	PE51	15266629	11405631	0.747096
boar_2	Sus scrofa	wild	f	Commercial farm, Sweden	9.1	PE51	16219669	12268001	0.756366
boar_3	Sus scrofa	wild	f	Commercial farm, Sweden	8.2	PE51	18105912	13270918	0.73296
boar_4	Sus scrofa	wild	f	Commercial farm, Sweden	8.8	PE51	28959338	19536814	0.674629
boar_5	Sus scrofa	wild	f	Commercial farm, Sweden	9	PE51	17220145	13047013	0.75766
pig_6	Sus scrofa	domestic	f	Commercial farm, Sweden	8.8	PE51	20780274	14896614	0.716863
pig_7	Sus scrofa	domestic	f	Commercial farm, Sweden	8.9	PE51	20551490	15085593	0.734039
pig_8	Sus scrofa	domestic	f	Commercial farm, Sweden	9	PE51	20691455	14546609	0.703025
pig_9	Sus scrofa	domestic	f	Commercial farm, Sweden	9	PE51	28361537	19056979	0.67193
pig_10	Sus scrofa	domestic	f	Commercial farm, Sweden	8.7	PE51	18809400	13971054	0.74277
A107	Oryctolagus cuniculus domesticus	domestic	m	Instituto de Investigacion en Recursos Cinegéticos IREC (CSIC-UCLM-JCCM), Spain	9.4	PE51	18754315	15709620	0.837654
A108	Oryctolagus cuniculus domesticus	domestic	f	Instituto de Investigacion en Recursos Cinegéticos IREC (CSIC-UCLM-JCCM), Spain	9.3	PE51	15852225	13433611	0.847427
A111	Oryctolagus cuniculus domesticus	domestic	m	Instituto de Investigacion en Recursos Cinegéticos IREC (CSIC-UCLM-JCCM), Spain	9.2	PE51	14785034	12107342	0.818892
A112	Oryctolagus cuniculus domesticus	domestic	f	Instituto de Investigacion en Recursos Cinegéticos IREC (CSIC-UCLM-JCCM), Spain	9.3	PE51	14576462	12092302	0.829577
A115	Oryctolagus cuniculus domesticus	domestic	f	Instituto de Investigacion en Recursos Cinegéticos IREC (CSIC-UCLM-JCCM), Spain	9.5	PE51	21946955	17547854	0.799558
A116	Oryctolagus cuniculus domesticus	domestic	m	Instituto de Investigacion en Recursos Cinegéticos IREC (CSIC-UCLM-JCCM), Spain	9.5	PE51	16521758	13712692	0.829978
7213	Oryctolagus cuniculus	wild	m	Instituto de Investigacion en Recursos Cinegéticos IREC (CSIC-UCLM-JCCM), Spain	9	PE51	70075308	14550711	0.207644
7808	Oryctolagus cuniculus	wild	f	Instituto de Investigacion en Recursos Cinegéticos IREC (CSIC-UCLM-JCCM), Spain	9.4	PE51	20357140	16968932	0.833562
7811	Oryctolagus cuniculus	wild	f	Instituto de Investigacion en Recursos Cinegéticos IREC (CSIC-UCLM-JCCM), Spain	9.3	PE51	13449419	10642610	0.791306
7357	Oryctolagus cuniculus	wild	m	Instituto de Investigacion en Recursos Cinegéticos IREC (CSIC-UCLM-JCCM), Spain	9.5	PE51	15931596	11455459	0.71904
7289	Oryctolagus cuniculus	wild	f	Instituto de Investigacion en Recursos Cinegéticos IREC (CSIC-UCLM-JCCM), Spain	9.5	PE51	26671987	21678202	0.81277
7810	Oryctolagus cuniculus	wild	m	Instituto de Investigacion en Recursos Cinegéticos IREC (CSIC-UCLM-JCCM), Spain	9.3	PE51	19448251	15823947	0.813644
D1m	Cavia porcellus	domestic	m	University of Münster, Germany	8.4	PE51	16018257	13299471	0.83027
D2m	Cavia porcellus	domestic	m	University of Münster, Germany	8.4	PE51	16146001	13916237	0.8619
D7m	Cavia porcellus	domestic	m	University of Münster, Germany	8.1	PE51	23347766	19497094	0.835073
D4f	Cavia porcellus	domestic	f	University of Münster, Germany	9	PE51	24325744	21171235	0.870322
D6f	Cavia porcellus	domestic	f	University of Münster, Germany	7.4	PE51	14291841	12838966	0.898342
D8f	Cavia porcellus	domestic	f	University of Münster, Germany	9.4	PE51	19225580	17155612	0.892333
A1m	Cavia aperea	wild	m	University of Münster, Germany	8.5	PE51	11925177	10244472	0.859062
A2m	Cavia aperea	wild	m	University of Münster, Germany	9	PE51	14741487	12873013	0.873251
A3m	Cavia aperea	wild	m	University of Münster, Germany	9.1	PE51	11286967	9616323	0.851985
A4f	Cavia aperea	wild	f	University of Münster, Germany	7.7	PE51	7699913	5778257	0.750431
A5f	Cavia aperea	wild	f	University of Münster, Germany	9.5	PE51	19667807	17001735	0.864445
A6f	Cavia aperea	wild	f	University of Münster, Germany	8.2	PE51	15488793	13781011	0.889741
AF1	Rattus norvegicus	aggressive	f	Max Planck Institute for Evolutionary Anthropology, Leipzig, Germany	8.1	PE51	16714920	9264157	0.554245	"mapped reads" are based on reads trimmed to SE51
AF2	Rattus norvegicus	aggressive	f	Max Planck Institute for Evolutionary Anthropology, Leipzig, Germany	8.1	PE51	20094356	10415331	0.518321	"mapped reads" are based on reads trimmed to SE51
AF3	Rattus norvegicus	aggressive	f	Max Planck Institute for Evolutionary Anthropology, Leipzig, Germany	8.1	PE51	24827497	6840428	0.275518	"mapped reads" are based on reads trimmed to SE51
AM1	Rattus norvegicus	aggressive	m	Max Planck Institute for Evolutionary Anthropology, Leipzig, Germany	8.1	PE51	22182211	11882369	0.535671	"mapped reads" are based on reads trimmed to SE51
AM2	Rattus norvegicus	aggressive	m	Max Planck Institute for Evolutionary Anthropology, Leipzig, Germany	8.2	PE51	20772278	10847637	0.522217	"mapped reads" are based on reads trimmed to SE51
AM3	Rattus norvegicus	aggressive	m	Max Planck Institute for Evolutionary Anthropology, Leipzig, Germany	8	PE51	19846075	10245191	0.516233	"mapped reads" are based on reads trimmed to SE51
TF1	Rattus norvegicus	tame	f	Max Planck Institute for Evolutionary Anthropology, Leipzig, Germany	8.1	PE51	20265500	4455975	0.21988	"mapped reads" are based on reads trimmed to SE51
TF2	Rattus norvegicus	tame	f	Max Planck Institute for Evolutionary Anthropology, Leipzig, Germany	8.1	SE76	35033876	17235599	0.49197	"mapped reads" are based on reads trimmed to SE51
TF3	Rattus norvegicus	tame	f	Max Planck Institute for Evolutionary Anthropology, Leipzig, Germany	8	SE76	40482360	16116510	0.398112	"mapped reads" are based on reads trimmed to SE51
TM1	Rattus norvegicus	tame	m	Max Planck Institute for Evolutionary Anthropology, Leipzig, Germany	7.7	PE51	22180521	12143491	0.547484	"mapped reads" are based on reads trimmed to SE51
TM2	Rattus norvegicus	tame	m	Max Planck Institute for Evolutionary Anthropology, Leipzig, Germany	8.1	PE51	20958618	10837137	0.517073	"mapped reads" are based on reads trimmed to SE51
TM3	Rattus norvegicus	tame	m	Max Planck Institute for Evolutionary Anthropology, Leipzig, Germany	8	PE76	10970256	6309530	0.575149	"mapped reads" are based on reads trimmed to SE51
								13971054
								4455975
								21678202
