# Supplementary material for: A Comparison of Brain Gene Expression Levels in Domesticated and Wild Animals
Source: PLoS Genet. 2012 Sep 27;8(9):e1002962. doi: 10.1371/journal.pgen.1002962 (PMC3459979; doi:10.1371/journal.pgen.1002962)
Supplement: Dataset S2 — Differentially expressed genes. (XLSX) [file pgen.1002962.s002.xlsx]

## Sheet: Dog
id	baseMean	baseMeanA	baseMeanB	foldChange	log2FoldChange	pval	padj	Associated.Gene.Name	Description_Ensembl	Additional_information
ENSCAFG00000019451	220.245	471.649	10.7419	0.0227752	-5.45639	4.82165e-24	9.27107e-20	TKTL1	transketolase-like 1 [Source:HGNC Symbol;Acc:11835]	This reaction links the pentose phosphate pathway with the glycolytic pathway. Variations in this gene may be the cause of Wernicke-Korsakoff syndrome.
ENSCAFG00000002057	382.126	593.488	205.991	0.347085	-1.52664	8.35687e-08	0.000770438	Q6E7G6_CANFA	Uncharacterized protein [Source:UniProtKB/TrEMBL;Acc:E2QV05]	PDGFRA platelet-derived growth factor receptor, alpha polypeptide
ENSCAFG00000022744	988.8	1492.53	569.025	0.381249	-1.39119	1.20206e-07	0.000770438			MT tRNA gene
ENSCAFG00000016103	944.055	519.971	1297.46	2.49525	1.31919	2.91432e-07	0.00140091	AP5Z1	adaptor-related protein complex 5, zeta 1 subunit [Source:HGNC Symbol;Acc:22197]
ENSCAFG00000007505	137.026	220.056	67.8338	0.308256	-1.6978	4.35699e-07	0.00156506	TDRD12	tudor domain containing 12 [Source:HGNC Symbol;Acc:25044]	piRNA pathway?
ENSCAFG00000023620	8.62698	17.7527	1.02218	0.0575789	-4.11832	4.8837e-07	0.00156506	FMO6P	flavin containing monooxygenase 6 pseudogene [Source:HGNC Symbol;Acc:24024]
ENSCAFG00000024539	56.0228	12.9146	91.9462	7.11953	2.83178	9.74368e-07	0.00267645		Uncharacterized protein [Source:UniProtKB/TrEMBL;Acc:E2R7G7]	novel
ENSCAFG00000023258	184.601	288.082	98.3667	0.341454	-1.55024	1.80314e-06	0.00433384		Uncharacterized protein [Source:UniProtKB/TrEMBL;Acc:F1PQ05]	novel
ENSCAFG00000025173	228.44	345.58	130.823	0.378561	-1.4014	2.43827e-06	0.00520922			novel
ENSCAFG00000007649	180.879	280.141	98.1606	0.350397	-1.51294	8.54447e-06	0.0161057			pseduogene
ENSCAFG00000023953	109.118	25.6059	178.711	6.9793	2.80308	9.21379e-06	0.0161057		Uncharacterized protein [Source:UniProtKB/TrEMBL;Acc:F1PYR1]	novel
ENSCAFG00000006629	165.927	311.321	44.7663	0.143795	-2.79792	1.32038e-05	0.021157	EFCAB1	EF-hand calcium binding domain 1 [Source:HGNC Symbol;Acc:25678]
ENSCAFG00000000217	1729.02	1031.85	2309.99	2.23869	1.16265	1.57387e-05	0.0232787	Q95N98_CANFA	Uncharacterized protein [Source:UniProtKB/TrEMBL;Acc:F1PA42]	Serum/glucocorticoid-regulated kinase 1
ENSCAFG00000016615	213.985	113.555	297.676	2.62142	1.39035	1.92416e-05	0.0264269	MRI1	methylthioribose-1-phosphate isomerase homolog (S. cerevisiae) [Source:HGNC Symbol;Acc:28469]
ENSCAFG00000014426	375.648	175.6	542.355	3.08858	1.62695	2.41667e-05	0.0308261	DDIT4	DNA-damage-inducible transcript 4 [Source:HGNC Symbol;Acc:24944]
ENSCAFG00000007539	82.1233	40.1278	117.12	2.91866	1.54531	2.5651e-05	0.0308261	ADML_CANFA	ADM Adrenomedullin Proadrenomedullin N-20 terminal peptide [Source:UniProtKB/Swiss-Prot;Acc:O77559]
ENSCAFG00000000934	130.929	201.608	72.0303	0.357278	-1.48488	2.91301e-05	0.0329479	COL14A1	collagen, type XIV, alpha 1 [Source:HGNC Symbol;Acc:2191]
ENSCAFG00000014176	227.162	333.623	138.443	0.414969	-1.26892	3.41113e-05	0.0359136		Uncharacterized protein [Source:UniProtKB/TrEMBL;Acc:F1PQ18]	novel
ENSCAFG00000025087	53.6477	14.3903	86.3622	6.00142	2.5853	3.54878e-05	0.0359136		Uncharacterized protein [Source:UniProtKB/TrEMBL;Acc:F1PSX2]	novel
ENSCAFG00000016883	83.5948	129.779	45.1079	0.347574	-1.52461	3.83165e-05	0.0368375	ITGAX	integrin, alpha X (complement component 3 receptor 4 subunit) [Source:HGNC Symbol;Acc:6152]	immune
ENSCAFG00000005631	45.539	74.2996	21.5718	0.290335	-1.78421	4.74316e-05	0.0424533	LYPD6	LY6/PLAUR domain containing 6 [Source:HGNC Symbol;Acc:28751]
ENSCAFG00000005093	191.744	275.037	122.332	0.444785	-1.16882	4.85736e-05	0.0424533	H1ADZ0_CANFA	Uncharacterized protein [Source:UniProtKB/TrEMBL;Acc:E2RFX0]
ENSCAFG00000023862	115.391	171.621	68.5321	0.399323	-1.32437	8.05492e-05	0.0673391			novel
ENSCAFG00000014354	165.683	240.366	103.448	0.430375	-1.21633	8.40568e-05	0.0673435	C10orf54	chromosome 10 open reading frame 54 [Source:HGNC Symbol;Acc:30085]	platelet receptor Gi24; stress induced secreted protein 1
ENSCAFG00000008607	98.2029	150.023	55.0193	0.366739	-1.44717	9.40128e-05	0.070238	SOX6	SRY (sex determining region Y)-box 6 [Source:HGNC Symbol;Acc:16421]
ENSCAFG00000025607	1196.56	653.561	1649.05	2.52318	1.33525	9.49755e-05	0.070238			novel
ENSCAFG00000015088	384.155	138.12	589.184	4.26575	2.0928	0.000114985	0.0812392	ARRDC2	arrestin domain containing 2 [Source:HGNC Symbol;Acc:25225]
ENSCAFG00000001804	93.231	47.5467	131.301	2.76152	1.46547	0.000118379	0.0812392	SHISA3	shisa homolog 3 (Xenopus laevis) [Source:HGNC Symbol;Acc:25159]
ENSCAFG00000006248	4137.37	5542.37	2966.54	0.535247	-0.901722	0.000122526	0.0812392	CHL1	cell adhesion molecule with homology to L1CAM (close homolog of L1) [Source:HGNC Symbol;Acc:1939]
ENSCAFG00000007594	78.2945	119.276	44.1435	0.370097	-1.43403	0.000129504	0.0830035	CD180	CD180 molecule [Source:HGNC Symbol;Acc:6726]	immune

## Sheet: Pig
id	baseMean	baseMeanA	baseMeanB	foldChange	log2FoldChange	pval	padj	Associated.Gene.Name	Description_Ensembl	Additional_information
ENSSSCG00000010039	436.755	691.654	181.856	0.26293	-1.92725	1.49398e-24	2.31896e-20	SLC5A4	Low affinity sodium-glucose cotransporter [Source:UniProtKB/Swiss-Prot;Acc:P31636]	sugar sensor / transporter
ENSSSCG00000000061	483.657	687.909	279.404	0.406164	-1.29987	6.21637e-12	4.82453e-08	PMM1	phosphomannomutase 1 [Source:RefSeq peptide;Acc:NP_001171824]	metabolism
ENSSSCG00000013260	423.07	577.15	268.989	0.466065	-1.1014	1.99616e-09	1.03281e-05	MDK	midkine [Source:RefSeq peptide;Acc:NP_001182281]	neurite growth-promoting factor 2
ENSSSCG00000006140	1855.96	1064.64	2647.27	2.48653	1.31413	1.57771e-08	6.12231e-05	CA2	Uncharacterized protein [Source:UniProtKB/TrEMBL;Acc:F1RXC2]	carbonic anhydrase
ENSSSCG00000014863	421.343	272.535	570.15	2.09202	1.0649	6.10625e-08	0.000189563	NA	NA	retired ID, diacylglycerol O-acyltransferase 2
ENSSSCG00000005979	38.5785	62.4285	14.7285	0.235926	-2.08359	1.35608e-07	0.000350817	ANXA13	Annexin [Source:UniProtKB/TrEMBL;Acc:F1RRP6]	Members of this calcium-dependent phospholipid-binding protein family play a role in the regulation of cellular growth and in signal transduction pathways
ENSSSCG00000001725	926.651	666.307	1186.99	1.78145	0.833055	4.61559e-07	0.00102347	GPR116	Uncharacterized protein [Source:UniProtKB/TrEMBL;Acc:F1RQ17]	immune?
ENSSSCG00000016688	123.684	177.432	69.9359	0.394157	-1.34316	6.94447e-07	0.0013474	CPVL	Uncharacterized protein [Source:UniProtKB/TrEMBL;Acc:F1SIG3]	carboxypeptidase, vitellogenic-like
ENSSSCG00000011457	136.773	83.9949	189.55	2.25669	1.17421	9.82581e-07	0.00169462	IL17RB	Uncharacterized protein [Source:UniProtKB/TrEMBL;Acc:F1SH81]	immune
ENSSSCG00000007841	57.5523	95.4978	19.6068	0.205312	-2.28411	1.20668e-06	0.001873			VWA3A: von Willebrand factor A domain containing 3A
ENSSSCG00000013865	73.0684	106.501	39.6353	0.372157	-1.42602	1.60872e-06	0.00227004	NWD1	Uncharacterized protein [Source:UniProtKB/TrEMBL;Acc:F1S9U8]	NACHT and WD repeat domain containing 1
ENSSSCG00000011533	1232.81	922.101	1543.51	1.67391	0.74322	3.28487e-06	0.00411891			novel
ENSSSCG00000000582	20.7275	4.49706	36.958	8.21825	3.03883	3.44968e-06	0.00411891	IAPP	Islet amyloid polypeptide [Source:UniProtKB/Swiss-Prot;Acc:Q29119]
ENSSSCG00000003651	170.454	76.8832	264.024	3.43409	1.77993	4.89641e-06	0.00542872	RHBDL2	Uncharacterized protein [Source:UniProtKB/TrEMBL;Acc:F1SV24]	intramembrane serine proteases
ENSSSCG00000007170	164.097	219.947	108.247	0.492152	-1.02282	5.78562e-06	0.00598696	CPXM1	Uncharacterized protein [Source:UniProtKB/TrEMBL;Acc:F1S8A0]	metallocarboxypeptidase 1
ENSSSCG00000010400	254.622	173.034	336.21	1.94303	0.958311	6.66848e-06	0.00646926	MSMB	Beta-microseminoprotein [Source:UniProtKB/Swiss-Prot;Acc:O02826]	immune: member of the immunoglobulin binding factor family
ENSSSCG00000018093	425.736	155.166	696.306	4.4875	2.16591	8.95345e-06	0.00817503			MT tRNA
ENSSSCG00000005616	8.7872	16.654	0.920402	0.0552661	-4.17746	9.71033e-06	0.00837354			novel
ENSSSCG00000015863	1400.05	1721.34	1078.76	0.626697	-0.674159	1.21449e-05	0.00992173	GPR17	Uncharacterized protein [Source:UniProtKB/TrEMBL;Acc:F1RQH6]	uracil nucleotide/cysteinyl leukotriene receptor
ENSSSCG00000015545	24810.7	18135.6	31485.7	1.73613	0.795873	1.31248e-05	0.0101862	GLUL	Glutamine synthetase [Source:UniProtKB/Swiss-Prot;Acc:P46410]	catalyzes the synthesis of glutamine from glutamate and ammonia.
ENSSSCG00000010057	9.4381	16.6022	2.27397	0.136968	-2.86809	1.4059e-05	0.0103916	C22ORF36	Uncharacterized protein [Source:UniProtKB/TrEMBL;Acc:F1RL43]	FAM211B family with sequence similarity 211, member B
ENSSSCG00000013895	3172.93	2430.25	3915.6	1.61119	0.688127	1.6867e-05	0.0119004	MAST3	Uncharacterized protein [Source:UniProtKB/TrEMBL;Acc:F1S920]	microtubule associated serine/threonine kinase 3
ENSSSCG00000009931	445.138	584.124	306.151	0.52412	-0.93203	1.92198e-05	0.0129709	MVK	Uncharacterized protein [Source:UniProtKB/TrEMBL;Acc:F1RIS8]	mevalonate kinase
ENSSSCG00000011460	79.7686	109.866	49.6708	0.452102	-1.14528	2.24056e-05	0.0144908			novel
ENSSSCG00000008694	968.267	684.374	1252.16	1.82964	0.87156	2.61428e-05	0.0162315	GRK4	Uncharacterized protein [Source:UniProtKB/TrEMBL;Acc:F1S8P7]	G protein-coupled receptor kinase 4, linked to hypertension
ENSSSCG00000011636	66.1625	39.4387	92.8863	2.35521	1.23586	3.18121e-05	0.0189918	BFSP2	Uncharacterized protein [Source:UniProtKB/TrEMBL;Acc:F1SLB0]	beaded filament structural protein 2, phakinin
ENSSSCG00000018061	29025.8	21689.5	36362.1	1.67648	0.745438	3.3511e-05	0.0192651			MT tRNA
ENSSSCG00000009883	3054	2351.76	3756.24	1.59721	0.675551	3.50212e-05	0.0194142	RPH3A	Uncharacterized protein [Source:UniProtKB/TrEMBL;Acc:F1RJM7]	Exocytosis of neurotransmitters and hormones is fundamental to synaptic neurotransmission and cell-cell communication. RAB3A (MIM 179390) is a small G protein that is thought to act at late stages of exocytosis, and RPH3A is a RAB3A effector (Lin et al., 2007 [PubMed 17149709])
ENSSSCG00000005740	34.8671	14.7468	54.9874	3.72877	1.8987	4.34299e-05	0.0232455	SARDH	Uncharacterized protein [Source:UniProtKB/TrEMBL;Acc:F1S0R9]	sarcosine dehydrogenase
ENSSSCG00000008842	1000.76	1337.3	664.226	0.496692	-1.00958	5.04993e-05	0.0256389	KIT	Mast/stem cell growth factor receptor Kit [Source:UniProtKB/Swiss-Prot;Acc:Q2HWD6]	KIT!
ENSSSCG00000004049	2034.34	2477.29	1591.39	0.642393	-0.638473	5.1205e-05	0.0256389	ACAT2	Uncharacterized protein [Source:UniProtKB/TrEMBL;Acc:F1SB62]	lipid metabolism, and it encodes cytosolic acetoacetyl-CoA thiolase
ENSSSCG00000018092	26551.7	18134.3	34969.2	1.92834	0.947361	5.32984e-05	0.0258531	MT-ND6	NADH-ubiquinone oxidoreductase chain 6 [Source:UniProtKB/Swiss-Prot;Acc:O79882]
ENSSSCG00000013349	282.592	205.435	359.748	1.75115	0.8083	7.16366e-05	0.0333425	HTATIP2	Uncharacterized protein [Source:UniProtKB/TrEMBL;Acc:F1SFY5]	HIV-1 Tat interactive protein 2
ENSSSCG00000010166	304.262	397.315	211.208	0.531588	-0.911619	7.30348e-05	0.0333425	C1ORF57	Uncharacterized protein [Source:UniProtKB/TrEMBL;Acc:F1RGU8]	NTPCR: nucleoside-triphosphatase, cancer-related
ENSSSCG00000017537	4.34157	0.685948	7.99719	11.6586	3.54332	8.45962e-05	0.0368398	HOXB8	Homeobox protein Hox-B8 [Source:UniProtKB/TrEMBL;Acc:F1RWG3]	development
ENSSSCG00000003953	760.064	580.814	939.314	1.61724	0.693529	8.5442e-05	0.0368398	NA	NA	retired, uncharacterized
ENSSSCG00000007430	48.5263	69.9411	27.1114	0.387632	-1.36724	9.27348e-05	0.0389035	NEURL2	Uncharacterized protein [Source:UniProtKB/TrEMBL;Acc:F1SC72]	neuralized homolog 2
ENSSSCG00000016824	435.98	542.253	329.707	0.608032	-0.717781	0.000115106	0.0470179	RAI14	ankycorbin [Source:RefSeq peptide;Acc:NP_001121934]	retinoic acid induced 14
ENSSSCG00000014645	15.6751	6.08837	25.2618	4.14918	2.05283	0.00012228	0.0486674	NA	NA
ENSSSCG00000008471	918.256	701.053	1135.46	1.61965	0.69568	0.000127768	0.0495805	NA	NA
ENSSSCG00000014564	157.795	248.606	66.9839	0.269438	-1.89197	0.000131097	0.0496313		Ifitm1-like protein [Source:UniProtKB/TrEMBL;Acc:A9QW81]
ENSSSCG00000010348	993.181	1314.97	671.387	0.51057	-0.969818	0.000137205	0.0507072	CDHR1	Uncharacterized protein [Source:UniProtKB/TrEMBL;Acc:F1SEP9]
ENSSSCG00000010336	40.0251	57.8916	22.1585	0.382759	-1.38549	0.000156475	0.0553813	SFTPA1	Pulmonary surfactant-associated protein A [Source:UniProtKB/Swiss-Prot;Acc:P49874]
ENSSSCG00000008509	153.739	201.463	106.016	0.526231	-0.926233	0.000156989	0.0553813	RASGRP3	Uncharacterized protein [Source:UniProtKB/TrEMBL;Acc:F1S407]
ENSSSCG00000005056	8.15694	13.9217	2.39219	0.171832	-2.54093	0.000169762	0.0585567	DLGAP5	Uncharacterized protein [Source:UniProtKB/TrEMBL;Acc:F1SSN9]
ENSSSCG00000003794	308.387	231.961	384.813	1.65895	0.730273	0.000176201	0.0594563	RPE65	Uncharacterized protein [Source:UniProtKB/TrEMBL;Acc:F1S830]
ENSSSCG00000018094	221246	155090	287402	1.85313	0.889962	0.000192545	0.0635891	MT-CYB	Cytochrome b [Source:UniProtKB/Swiss-Prot;Acc:P24964]
ENSSSCG00000006776	274.793	347.614	201.971	0.581021	-0.783339	0.000202996	0.065644	MOV10	Uncharacterized protein [Source:UniProtKB/TrEMBL;Acc:F1SBP9]
ENSSSCG00000017726	1.84146	0	3.68293	Inf	Inf	0.000214877	0.0680676	SPACA3	sperm acrosome membrane-associated protein 3 [Source:RefSeq peptide;Acc:NP_001171399]
ENSSSCG00000016034	1109.77	1430.63	788.919	0.551448	-0.858702	0.000232458	0.0721641	COL3A1	collagen alpha-1(III) chain [Source:RefSeq peptide;Acc:NP_001230226]
ENSSSCG00000016340	603.855	467.357	740.353	1.58413	0.66369	0.000243066	0.0739779	ASB1	Uncharacterized protein [Source:UniProtKB/TrEMBL;Acc:F1SIU7]
ENSSSCG00000003944	719.624	561.927	877.321	1.56127	0.642721	0.000263619	0.0786904	NA	NA
ENSSSCG00000015862	447.652	550.17	345.135	0.627324	-0.672718	0.000269168	0.0788305	LIMS2	Uncharacterized protein [Source:UniProtKB/TrEMBL;Acc:F1RQH7]
ENSSSCG00000012653	643.25	796.216	490.284	0.615767	-0.699543	0.000298802	0.0854256	ZDHHC9	Uncharacterized protein [Source:UniProtKB/TrEMBL;Acc:F1RTH7]
ENSSSCG00000004492	819.1	449.247	1188.95	2.64655	1.40411	0.000307156	0.0854256	SLC14A1	Uncharacterized protein [Source:UniProtKB/TrEMBL;Acc:F1RPU5]
ENSSSCG00000018091	131335	96023.5	166647	1.73548	0.795334	0.000309551	0.0854256	MT-ND5	NADH-ubiquinone oxidoreductase chain 5 [Source:UniProtKB/Swiss-Prot;Acc:Q9TDR1]
ENSSSCG00000005339	251.025	337.359	164.692	0.488181	-1.03451	0.000317735	0.0854256	GLIPR2	Uncharacterized protein [Source:UniProtKB/TrEMBL;Acc:F1ST88]
ENSSSCG00000004588	12.5878	20.3757	4.80003	0.235577	-2.08573	0.000327156	0.0854256	CCNB2	G2/mitotic-specific cyclin-B2 [Source:RefSeq peptide;Acc:NP_001107754]
ENSSSCG00000016872	8980.83	11136.4	6825.23	0.612874	-0.706338	0.000328142	0.0854256	HMGCS1	Uncharacterized protein [Source:UniProtKB/TrEMBL;Acc:F1SMG8]
ENSSSCG00000008785	87.9316	117.204	58.6594	0.500491	-0.998584	0.000330211	0.0854256	FAM114A1	Uncharacterized protein [Source:UniProtKB/TrEMBL;Acc:F1S4J0]
ENSSSCG00000013932	47.9679	68.1124	27.8233	0.408491	-1.29162	0.000351019	0.0879781	EDG4	lysophosphatidic acid receptor 2 [Source:RefSeq peptide;Acc:NP_001155873]
ENSSSCG00000005494	1130.89	1453.53	808.251	0.556059	-0.84669	0.000351414	0.0879781	TNC	Tenascin [Source:UniProtKB/Swiss-Prot;Acc:Q29116]
ENSSSCG00000010444	9.88509	16.9242	2.84598	0.16816	-2.57209	0.000363771	0.0894577	LIPM	Uncharacterized protein [Source:UniProtKB/TrEMBL;Acc:F1SCZ0]
ENSSSCG00000012985	2567.19	2013.29	3121.09	1.55025	0.632496	0.000373678	0.0894577	LTBP3	Uncharacterized protein [Source:UniProtKB/TrEMBL;Acc:F1RRJ9]
ENSSSCG00000007816	13.5949	5.8871	21.3028	3.61855	1.85541	0.000374907	0.0894577	IL21R	Uncharacterized protein [Source:UniProtKB/TrEMBL;Acc:F1RFG0]
ENSSSCG00000006172	7.29491	12.8539	1.73588	0.135046	-2.88847	0.000392368	0.0894577	PI15	Uncharacterized protein [Source:UniProtKB/TrEMBL;Acc:F1RWK2]
ENSSSCG00000010471	21.5553	32.8835	10.227	0.311008	-1.68498	0.000402155	0.0894577	KIF11	Uncharacterized protein [Source:UniProtKB/TrEMBL;Acc:F1SC89]
ENSSSCG00000014899	398.635	494.459	302.81	0.612407	-0.707437	0.000409982	0.0894577	PRCP	Uncharacterized protein [Source:UniProtKB/TrEMBL;Acc:F1STV0]
ENSSSCG00000015356	47.3853	22.2169	72.5538	3.26571	1.7074	0.000416071	0.0894577	AGMO	Uncharacterized protein [Source:UniProtKB/TrEMBL;Acc:F1SF60]
ENSSSCG00000003137	21.7761	32.2021	11.3501	0.352464	-1.50445	0.000420704	0.0894577	PLEKHA4	Uncharacterized protein [Source:UniProtKB/TrEMBL;Acc:F1RL82]
ENSSSCG00000004830	414.492	321.629	507.355	1.57746	0.657601	0.000423592	0.0894577	ATP10A	Uncharacterized protein [Source:UniProtKB/TrEMBL;Acc:F1SNS2]
ENSSSCG00000009378	49.7843	70.1405	29.4281	0.41956	-1.25305	0.00042372	0.0894577	CKAP2	Uncharacterized protein [Source:UniProtKB/TrEMBL;Acc:F1RMD2]
ENSSSCG00000012307	9.00106	14.5274	3.47468	0.239181	-2.06383	0.000426363	0.0894577	CCNB3	Cyclin B3 [Source:UniProtKB/TrEMBL;Acc:H1UBL4]
ENSSSCG00000017433	24.3386	12.978	35.6992	2.75075	1.45983	0.000426542	0.0894577	KRT14	Uncharacterized protein [Source:UniProtKB/TrEMBL;Acc:F1S0L1]
ENSSSCG00000013916	20.7336	9.67541	31.7918	3.28584	1.71626	0.000432246	0.0894577	COMP	Uncharacterized protein [Source:UniProtKB/TrEMBL;Acc:F1S902]

## Sheet: Rabbit
id	baseMean	baseMeanA	baseMeanB	foldChange	log2FoldChange	pval	padj	Associated.Gene.Name	Description_Ensembl	Additional_information
ENSOCUG00000007649	755.603	265.183	1164.29	4.39051	2.13439	1.10828e-23	1.91311e-19	MYO5C	myosin VC [Source:HGNC Symbol;Acc:7604]	motor contraction?
ENSOCUG00000011525	316.46	546.282	124.941	0.228712	-2.1284	1.62292e-10	1.40074e-06	PPL	periplakin [Source:HGNC Symbol;Acc:9273]	component of desmosomes and of the epidermal cornified envelope in keratinocytes
ENSOCUG00000017829	36.6831	70.392	8.59238	0.122065	-3.03428	1.28545e-09	6.7103e-06			novel
ENSOCUG00000023618	23.2377	1.99865	40.9369	20.4823	4.3563	1.55493e-09	6.7103e-06	NPHS1	nephrosis 1, congenital, Finnish type (nephrin) [Source:HGNC Symbol;Acc:7908]	member of the immunoglobulin family of cell adhesion molecules that functions in the glomerular filtration barrier in the kidney
ENSOCUG00000010163	49.7272	88.1062	17.7447	0.201401	-2.31185	2.07757e-08	7.1726e-05	ACSBG2	acyl-CoA synthetase bubblegum family member 2 [Source:HGNC Symbol;Acc:24174]
ENSOCUG00000021284	38.8307	72.4112	10.8469	0.149796	-2.73893	3.24515e-08	9.33628e-05			pseudogene
ENSOCUG00000025132	293.755	96.1374	458.436	4.76854	2.25355	2.3209e-07	0.000521671			novel
ENSOCUG00000022191	141.339	71.5775	199.474	2.78683	1.47863	2.41766e-07	0.000521671			pseudogene
ENSOCUG00000021689	181.436	297.29	84.8921	0.285553	-1.80817	1.32465e-06	0.00254067	KLK5	kallikrein-related peptidase 5 [Source:HGNC Symbol;Acc:6366]	serine proteases having diverse physiological functions, The encoded protein is secreted and may be involved in desquamation in the epidermis
ENSOCUG00000005374	127.772	194.036	72.5514	0.373906	-1.41925	2.25601e-06	0.00389432	C7	complement component 7 [Source:HGNC Symbol;Acc:1346]	immune
ENSOCUG00000002151	413.122	261.621	539.372	2.06166	1.04381	3.39079e-06	0.00532108	SDR39U1	short chain dehydrogenase/reductase family 39U, member 1 [Source:HGNC Symbol;Acc:20275]
ENSOCUG00000002142	4.9407	0	9.05796	Inf	Inf	5.69372e-06	0.00819041	CBLN3	cerebellin 3 precursor [Source:HGNC Symbol;Acc:20146]
ENSOCUG00000016797	7.28205	14.3804	1.36672	0.0950401	-3.39532	6.70918e-06	0.00890876			novel
ENSOCUG00000017949	3.51054	7.59111	0.110064	0.014499	-6.1079	8.41497e-06	0.0103757	HAO2	hydroxyacid oxidase 2 (long chain) [Source:HGNC Symbol;Acc:4810]
ENSOCUG00000021021	17.9441	4.58316	29.0781	6.34457	2.66552	1.87202e-05	0.0215433	FA7_RABIT	Coagulation factor VIIFactor VII light chainFactor VII heavy chain [Source:UniProtKB/Swiss-Prot;Acc:P98139]
ENSOCUG00000027186	33.6433	61.415	10.5002	0.170971	-2.54818	2.13325e-05	0.021909	STYXL1	serine/threonine/tyrosine interacting-like 1 [Source:HGNC Symbol;Acc:18165]
ENSOCUG00000022346	155.917	222.585	100.361	0.450889	-1.14916	2.15765e-05	0.021909	Q6B4R8_RABIT	Lymphocyte receptor CD5 [Source:UniProtKB/TrEMBL;Acc:Q6B4R8]	immune
ENSOCUG00000005496	4.74873	0.221891	8.5211	38.4022	5.26312	2.60005e-05	0.0237671	BAT1_RABIT	B(0,+)-type amino acid transporter 1 [Source:UniProtKB/Swiss-Prot;Acc:Q9N1R6]
ENSOCUG00000016171	624.33	956.462	347.554	0.363374	-1.46047	2.61601e-05	0.0237671	CDH23	cadherin-related 23 [Source:HGNC Symbol;Acc:13733]
ENSOCUG00000009056	53.3778	114.666	2.30461	0.0200986	-5.63676	3.40304e-05	0.0293716	PDILT	protein disulfide isomerase-like, testis expressed [Source:HGNC Symbol;Acc:27338]
ENSOCUG00000021373	4.65423	9.64954	0.491471	0.050932	-4.29528	3.5849e-05	0.0294679			novel
ENSOCUG00000021800	162.398	31.6596	271.347	8.57078	3.09943	4.37315e-05	0.0343133			pseudogene
ENSOCUG00000008571	123.439	204.322	56.0373	0.27426	-1.86639	4.70705e-05	0.0353275	MYOM1	myomesin 1, 185kDa [Source:HGNC Symbol;Acc:7613]	myofibrilar protein, MYOM2 = Titin
ENSOCUG00000005742	76.3203	113.724	45.1504	0.397017	-1.33273	4.96557e-05	0.0357148	KCTD14	potassium channel tetramerisation domain containing 14 [Source:HGNC Symbol;Acc:23295]
ENSOCUG00000016623	6.54679	13.8963	0.422231	0.0303845	-5.04052	6.51349e-05	0.0449743			novel
ENSOCUG00000002289	494.067	308.1	649.039	2.10658	1.07491	6.91955e-05	0.0456983	VKORC1	vitamin K epoxide reductase complex, subunit 1 [Source:HGNC Symbol;Acc:23663]
ENSOCUG00000026499	88.0718	35.8172	131.617	3.6747	1.87763	7.1478e-05	0.0456983			novel
ENSOCUG00000027980	208.953	68.9397	325.63	4.7234	2.23983	0.000106752	0.0658124			novel
ENSOCUG00000006097	4.17399	9.0507	0.110064	0.0121608	-6.36162	0.000123888	0.073743	GP2	glycoprotein 2 (zymogen granule membrane) [Source:HGNC Symbol;Acc:4441]
ENSOCUG00000015039	212.429	290.408	147.447	0.507723	-0.977886	0.000136164	0.0783487	FNDC1	fibronectin type III domain containing 1 [Source:HGNC Symbol;Acc:21184]
ENSOCUG00000021191	73.2952	28.3899	110.716	3.89985	1.96342	0.000163567	0.0910802			novel

## Sheet: Guineapig
id	baseMean	baseMeanA	baseMeanB	foldChange	log2FoldChange	pval	padj	Associated.Gene.Name	Description_Ensembl	Additional_information
ENSCPOG00000011206	559.994	1114.62	5.37065	0.00481838	-7.69724	1.19106e-163	1.99562e-159
ENSCPOG00000003930	127.749	242.296	13.2024	0.0544886	-4.1979	2.1181e-50	1.77444e-46
ENSCPOG00000015324	330.395	70.0174	590.773	8.43753	3.07682	3.58621e-49	2.0029e-45	Tnnt2	troponin T, cardiac muscle isoform embryonic 1 [Source:RefSeq peptide;Acc:NP_001166334]
ENSCPOG00000012690	47.0583	93.1852	0.931349	0.0099946	-6.64464	5.80887e-41	2.43319e-37	SYCP1	synaptonemal complex protein 1 [Source:HGNC Symbol;Acc:11487]
ENSCPOG00000013220	785.149	1494.18	76.1125	0.0509391	-4.29508	2.79255e-40	9.35785e-37
ENSCPOG00000027235	624.014	95.9312	1152.1	12.0096	3.58612	5.27526e-39	1.47312e-35
ENSCPOG00000008846	137.831	246.94	28.7228	0.116315	-3.10389	3.45032e-35	8.25858e-32
ENSCPOG00000022886	100.473	181.029	19.9176	0.110024	-3.1841	3.88466e-33	8.13593e-30
ENSCPOG00000004214	334.449	558.581	110.316	0.197494	-2.34012	2.3626e-32	4.39837e-29	CFI	complement factor I [Source:HGNC Symbol;Acc:5394]
ENSCPOG00000025433	161.46	274.428	48.4921	0.176702	-2.50061	8.69971e-31	1.45764e-27
ENSCPOG00000021213	115.723	202.56	28.8859	0.142604	-2.80991	6.59635e-30	1.00474e-26
ENSCPOG00000023631	164.207	277.525	50.8901	0.183371	-2.44716	3.54304e-29	4.94696e-26
ENSCPOG00000002408	63.4345	117.273	9.59631	0.081829	-3.61124	3.66959e-27	4.72953e-24	OLFML1	olfactomedin-like 1 [Source:HGNC Symbol;Acc:24473]
ENSCPOG00000004199	309.866	490.549	129.183	0.263344	-1.92498	7.6615e-27	9.16917e-24	CO3_CAVPO	Complement C3 Complement C3 beta chain Complement C3 alpha chain C3a anaphylatoxin Complement C3b alpha' chain Complement C3c alpha' chain fragment 1 Complement C3dg fragment Complement C3g fragment Complement C3d fragment Complement C3f fragment Co /.../nt C3c alpha' chain fragment 2 [Source:UniProtKB/Swiss-Prot;Acc:P12387]
ENSCPOG00000022775	74.4419	0	148.884	Inf	Inf	2.90856e-26	3.24886e-23
ENSCPOG00000015572	318.59	582.381	54.7982	0.0940934	-3.40976	6.52089e-26	6.8286e-23	PLK4	polo-like kinase 4 [Source:HGNC Symbol;Acc:11397]
ENSCPOG00000004555	107.64	26.4842	188.796	7.12862	2.83362	7.9413e-26	7.82686e-23	HOGA1	4-hydroxy-2-oxoglutarate aldolase 1 [Source:HGNC Symbol;Acc:25155]
ENSCPOG00000010058	47.6013	89.5243	5.67822	0.0634266	-3.97877	1.43754e-25	1.33811e-22	DNAH8	dynein, axonemal, heavy chain 8 [Source:HGNC Symbol;Acc:2952]
ENSCPOG00000027089	712.642	1140.59	284.699	0.249608	-2.00226	1.7806e-25	1.5702e-22
ENSCPOG00000017415	51.24	3.24991	99.2301	30.5332	4.93231	1.07705e-24	9.02303e-22
ENSCPOG00000010074	201.1	333.079	69.1206	0.20752	-2.26867	2.83391e-24	2.26105e-21	CRB2	crumbs homolog 2 (Drosophila) [Source:HGNC Symbol;Acc:18688]
ENSCPOG00000021720	23.2446	1.0981	45.3911	41.336	5.36933	2.99906e-24	2.28406e-21
ENSCPOG00000008313	131.984	219.941	44.027	0.200176	-2.32066	2.57481e-21	1.8757e-18	REC8	REC8 homolog (yeast) [Source:HGNC Symbol;Acc:16879]
ENSCPOG00000027032	85.3489	143.122	27.5757	0.192673	-2.37578	2.85848e-21	1.99557e-18
ENSCPOG00000023437	20.3209	40.6417	0	0	#NAME?	5.16279e-19	3.4601e-16	PYY	peptide YY [Source:HGNC Symbol;Acc:9748]
ENSCPOG00000021418	44.9469	0.182383	89.7115	491.886	8.94218	5.70711e-19	3.67779e-16
ENSCPOG00000020269	137.759	221.708	53.8094	0.242704	-2.04273	6.77838e-19	4.09632e-16	C1orf222	chromosome 1 open reading frame 222 [Source:HGNC Symbol;Acc:27917]
ENSCPOG00000009805	84.4909	140.862	28.1203	0.199631	-2.3246	6.84554e-19	4.09632e-16
ENSCPOG00000010833	46.7942	11.2685	82.32	7.3053	2.86894	4.81936e-18	2.78443e-15	5HT3A_CAVPO	5-hydroxytryptamine receptor 3A [Source:UniProtKB/Swiss-Prot;Acc:O70212]
ENSCPOG00000022046	18.3056	0.660595	35.9507	54.4217	5.76611	1.45989e-17	8.15349e-15
ENSCPOG00000021303	139.985	53.66	226.31	4.21748	2.07638	3.20711e-17	1.73339e-14
ENSCPOG00000022049	35.9915	63.4589	8.52409	0.134325	-2.8962	4.81613e-17	2.5217e-14
ENSCPOG00000023212	2553.29	1136.76	3969.83	3.49225	1.80416	6.10131e-17	3.0978e-14	AGT	angiotensinogen (serpin peptidase inhibitor, clade A, member 8) [Source:HGNC Symbol;Acc:333]
ENSCPOG00000025921	94.455	161.618	27.2919	0.168867	-2.56604	7.86717e-17	3.87689e-14
ENSCPOG00000022900	54.8832	15.9103	93.8561	5.89906	2.56049	1.06158e-16	5.08194e-14	RIPK4	receptor-interacting serine-threonine kinase 4 [Source:HGNC Symbol;Acc:496]
ENSCPOG00000006058	60.6479	17.8073	103.489	5.81157	2.53893	1.67993e-16	7.81869e-14	NEIL2	nei endonuclease VIII-like 2 (E. coli) [Source:HGNC Symbol;Acc:18956]
ENSCPOG00000003271	248.638	386.012	111.263	0.288236	-1.79468	3.17717e-16	1.43874e-13	ADCY7	adenylate cyclase 7 [Source:HGNC Symbol;Acc:238]
ENSCPOG00000021203	31.9392	57.6742	6.20421	0.107573	-3.21661	7.19471e-16	3.1723e-13	MFI2	antigen p97 (melanoma associated) identified by monoclonal antibodies 133.2 and 96.5 [Source:HGNC Symbol;Acc:7037]
ENSCPOG00000001147	344.174	166.182	522.166	3.14213	1.65174	1.41878e-15	6.09529e-13	A9Z0V9_CAVPO	carbonic anhydrase 3 [Source:RefSeq peptide;Acc:NP_001166546]
ENSCPOG00000010906	190.836	317.015	64.6558	0.203952	-2.2937	1.90565e-15	7.98228e-13	PKD2L1	polycystic kidney disease 2-like 1 [Source:HGNC Symbol;Acc:9011]
ENSCPOG00000015534	27.7662	51.0154	4.51703	0.0885425	-3.49749	2.5083e-15	1.02504e-12
ENSCPOG00000012173	22.1381	3.77713	40.4991	10.7222	3.42253	3.47225e-15	1.38518e-12	VIT	vitrin [Source:HGNC Symbol;Acc:12697]
ENSCPOG00000017403	31172.6	12936.9	49408.2	3.81918	1.93326	3.62177e-15	1.41123e-12	Q9TEH1_CAVPO	NADH dehydrogenase subunit 1 [Source:RefSeq peptide;Acc:NP_008751]
ENSCPOG00000017426	16.5827	1.6668	31.4985	18.8976	4.24013	4.11893e-15	1.56847e-12
ENSCPOG00000024822	141.895	221.745	62.0458	0.279807	-1.8375	9.17731e-15	3.39245e-12	COL4A3	collagen, type IV, alpha 3 (Goodpasture antigen) [Source:HGNC Symbol;Acc:2204]
ENSCPOG00000011644	18.6789	35.5934	1.76448	0.0495732	-4.3343	9.3138e-15	3.39245e-12	LRRC34	leucine rich repeat containing 34 [Source:HGNC Symbol;Acc:28408]
ENSCPOG00000002158	139.37	215.644	63.0956	0.292591	-1.77304	1.45528e-14	5.18791e-12	C1orf228	chromosome 1 open reading frame 228 [Source:HGNC Symbol;Acc:34345]
ENSCPOG00000017406	316.491	74.3831	558.598	7.50974	2.90876	1.56778e-14	5.47252e-12
ENSCPOG00000020466	116.832	42.0229	191.641	4.56038	2.18915	1.91258e-14	6.42212e-12	COL11A2	collagen, type XI, alpha 2 [Source:HGNC Symbol;Acc:2187]
ENSCPOG00000015064	100.671	33.3667	167.974	5.03419	2.33176	1.91648e-14	6.42212e-12	GPNMB	glycoprotein (transmembrane) nmb [Source:HGNC Symbol;Acc:4462]
ENSCPOG00000023798	13.4851	25.6894	1.28087	0.0498598	-4.32598	2.05519e-14	6.75189e-12
ENSCPOG00000002420	14.1333	0.234102	28.0324	119.745	6.90382	2.44056e-14	7.86377e-12	ST6GALNAC1	ST6 (alpha-N-acetyl-neuraminyl-2,3-beta-galactosyl-1,3)-N-acetylgalactosaminide alpha-2,6-sialyltransferase 1 [Source:HGNC Symbol;Acc:23614]
ENSCPOG00000000742	157.485	41.8172	273.153	6.53207	2.70754	3.85522e-14	1.21153e-11	FMOD	fibromodulin [Source:HGNC Symbol;Acc:3774]
ENSCPOG00000003950	17.1458	32.483	1.8087	0.0556814	-4.16666	3.90468e-14	1.21153e-11	C5AR_CAVPO	C5a anaphylatoxin chemotactic receptor [Source:UniProtKB/Swiss-Prot;Acc:O70129]
ENSCPOG00000008262	892.299	1529.28	255.321	0.166955	-2.58247	4.974e-14	1.51526e-11	PAQR7	progestin and adipoQ receptor family member VII [Source:HGNC Symbol;Acc:23146]
ENSCPOG00000025795	11.1921	22.0504	0.333798	0.015138	-6.04568	6.58682e-14	1.97075e-11
ENSCPOG00000027215	154.512	233.767	75.2573	0.321932	-1.63517	7.72919e-14	2.27198e-11
ENSCPOG00000014271	188.016	82.2294	293.802	3.57295	1.83712	1.24328e-13	3.59157e-11	ISLR	immunoglobulin superfamily containing leucine-rich repeat [Source:HGNC Symbol;Acc:6133]
ENSCPOG00000019543	17.2369	32.1236	2.35016	0.0731601	-3.7728	9.91282e-13	2.81507e-10	LRRC2	leucine rich repeat containing 2 [Source:HGNC Symbol;Acc:14676]
ENSCPOG00000008773	24.6754	44.3647	4.98617	0.11239	-3.15341	1.23488e-12	3.44841e-10	SMPDL3B	sphingomyelin phosphodiesterase, acid-like 3B [Source:HGNC Symbol;Acc:21416]
ENSCPOG00000017420	47187.3	16907.2	77467.4	4.58191	2.19595	1.2564e-12	3.45098e-10	Q9TEG5_CAVPO	cytochrome c oxidase subunit III [Source:RefSeq peptide;Acc:NP_008757]
ENSCPOG00000023279	36.1092	60.3434	11.875	0.196791	-2.34527	1.6926e-12	4.57411e-10	TPPP2	tubulin polymerization-promoting protein family member 2 [Source:HGNC Symbol;Acc:19293]
ENSCPOG00000000650	259.725	131.196	388.254	2.95935	1.56528	1.77698e-12	4.72592e-10	COL22A1	collagen, type XXII, alpha 1 [Source:HGNC Symbol;Acc:22989]
ENSCPOG00000013320	79.6584	19.3317	139.985	7.2412	2.85623	3.16745e-12	8.29228e-10	NEBL	nebulette [Source:HGNC Symbol;Acc:16932]
ENSCPOG00000025630	49.8042	16.2978	83.3106	5.11177	2.35382	3.74087e-12	9.64281e-10	TTC34	tetratricopeptide repeat domain 34 [Source:HGNC Symbol;Acc:34297]
ENSCPOG00000004685	214.683	310.767	118.599	0.381635	-1.38974	4.67933e-12	1.1825e-09	TTC12	tetratricopeptide repeat domain 12 [Source:HGNC Symbol;Acc:23700]
ENSCPOG00000009976	10.3077	19.7601	0.855343	0.0432864	-4.52994	4.7286e-12	1.1825e-09
ENSCPOG00000006895	28.4027	50.421	6.38436	0.126621	-2.98141	5.58718e-12	1.37667e-09	SRMS	src-related kinase lacking C-terminal regulatory tyrosine and N-terminal myristylation sites [Source:HGNC Symbol;Acc:11298]
ENSCPOG00000025820	107.079	165.49	48.6679	0.294084	-1.7657	6.10147e-12	1.4816e-09	IL12RB1	interleukin 12 receptor, beta 1 [Source:HGNC Symbol;Acc:5971]
ENSCPOG00000004153	91.3427	156.526	26.1591	0.167122	-2.58102	8.33646e-12	1.99539e-09	OAS3	2'-5'-oligoadenylate synthetase 3, 100kDa [Source:HGNC Symbol;Acc:8088]
ENSCPOG00000010128	54.0134	89.0115	19.0153	0.213627	-2.22683	9.31839e-12	2.19901e-09	LRP2BP	LRP2 binding protein [Source:HGNC Symbol;Acc:25434]
ENSCPOG00000022398	45.2728	0.564257	89.9813	159.468	7.31713	1.04117e-11	2.42146e-09	CDHR5	cadherin-related family member 5 [Source:HGNC Symbol;Acc:7521]
ENSCPOG00000007315	12.4699	1.79234	23.1475	12.9146	3.69094	1.05501e-11	2.42146e-09	ASB10	ankyrin repeat and SOCS box containing 10 [Source:HGNC Symbol;Acc:17185]
ENSCPOG00000009492	50.3084	20.2715	80.3454	3.96347	1.98676	1.18818e-11	2.69027e-09	LGR6	leucine-rich repeat containing G protein-coupled receptor 6 [Source:HGNC Symbol;Acc:19719]
ENSCPOG00000008655	350.115	501.713	198.517	0.39568	-1.3376	1.21359e-11	2.71116e-09	PDGFRL	platelet-derived growth factor receptor-like [Source:HGNC Symbol;Acc:8805]
ENSCPOG00000002606	153.871	232.432	75.3106	0.324011	-1.62589	1.29495e-11	2.85486e-09	CCNA1	cyclin A1 [Source:HGNC Symbol;Acc:1577]
ENSCPOG00000025681	77.141	133.781	20.5015	0.153247	-2.70607	1.7129e-11	3.72723e-09
ENSCPOG00000023852	36.2803	63.7534	8.80711	0.138143	-2.85576	2.66582e-11	5.72638e-09	TUBA3D	tubulin, alpha 3d [Source:HGNC Symbol;Acc:24071]
ENSCPOG00000022434	57.1236	21.8765	92.3708	4.22237	2.07805	2.70391e-11	5.73469e-09	WISP1	WNT1 inducible signaling pathway protein 1 [Source:HGNC Symbol;Acc:12769]
ENSCPOG00000017431	423.636	49.5865	797.686	16.0868	4.0078	2.74579e-11	5.75071e-09
ENSCPOG00000027598	59.9142	14.0279	105.801	7.54218	2.91498	2.90094e-11	6.00065e-09	AQP5	aquaporin 5 [Source:HGNC Symbol;Acc:638]
ENSCPOG00000007985	146.516	220.282	72.7501	0.330259	-1.59833	3.12784e-11	6.3911e-09	UMPS	uridine monophosphate synthetase [Source:HGNC Symbol;Acc:12563]
ENSCPOG00000026221	58.8926	23.0153	94.77	4.1177	2.04184	3.51631e-11	7.09829e-09
ENSCPOG00000025696	496.293	204.433	788.153	3.85532	1.94685	4.1428e-11	8.2634e-09	ALDH1A1	aldehyde dehydrogenase 1 family, member A1 [Source:HGNC Symbol;Acc:402]
ENSCPOG00000025566	400.934	570.931	230.937	0.404492	-1.30582	5.11025e-11	1.00732e-08
ENSCPOG00000010087	425.442	673.15	177.733	0.264032	-1.92122	5.6533e-11	1.10141e-08
ENSCPOG00000011280	88.429	155.803	21.0548	0.135137	-2.88751	6.38641e-11	1.22994e-08	MGAM	maltase-glucoamylase (alpha-glucosidase) [Source:HGNC Symbol;Acc:7043]
ENSCPOG00000024904	17.0007	32.0514	1.95	0.0608399	-4.03884	6.68507e-11	1.27282e-08	CRX	cone-rod homeobox [Source:HGNC Symbol;Acc:2383]
ENSCPOG00000025758	245.19	351.32	139.06	0.395822	-1.33708	7.41951e-11	1.38493e-08	KIF17	kinesin family member 17 [Source:HGNC Symbol;Acc:19167]
ENSCPOG00000005781	55.6542	86.8833	24.425	0.281124	-1.83072	7.43918e-11	1.38493e-08
ENSCPOG00000027394	353.822	493.258	214.386	0.434632	-1.20213	7.63515e-11	1.40579e-08
ENSCPOG00000001099	407.756	559.492	256.02	0.457594	-1.12786	8.30182e-11	1.51192e-08
ENSCPOG00000003809	63.5447	29.2347	97.8548	3.34722	1.74296	1.02785e-10	1.85179e-08	PLA2G4A	phospholipase A2, group IVA (cytosolic, calcium-dependent) [Source:HGNC Symbol;Acc:9035]
ENSCPOG00000029042	313.342	21.4731	605.21	28.1846	4.81683	1.14891e-10	2.04786e-08
ENSCPOG00000004268	245.268	353.024	137.511	0.389522	-1.36022	1.36449e-10	2.40654e-08	ZNHIT3	zinc finger, HIT-type containing 3 [Source:HGNC Symbol;Acc:12309]
ENSCPOG00000008421	6.98619	0.453199	13.5192	29.8306	4.89872	1.50928e-10	2.63417e-08
ENSCPOG00000009944	147.232	222.561	71.9037	0.323074	-1.63006	1.55857e-10	2.69215e-08
ENSCPOG00000019352	60.2422	19.2969	101.188	5.24373	2.39059	1.75597e-10	3.00217e-08
ENSCPOG00000001159	172.972	250.884	95.0609	0.378904	-1.4001	1.90823e-10	3.22954e-08	ZFP2	zinc finger protein 2 homolog (mouse) [Source:HGNC Symbol;Acc:26138]
ENSCPOG00000020817	246.6	357.126	136.075	0.381027	-1.39204	2.1868e-10	3.66398e-08
ENSCPOG00000020205	76.4108	37.1413	115.68	3.1146	1.63904	2.39623e-10	3.97514e-08	CTH	cystathionase (cystathionine gamma-lyase) [Source:HGNC Symbol;Acc:2501]
ENSCPOG00000005609	396.888	130.389	663.388	5.08778	2.34704	2.46723e-10	4.05278e-08	S100A4	S100 calcium binding protein A4 [Source:HGNC Symbol;Acc:10494]
ENSCPOG00000024507	115.569	167.305	63.8321	0.381531	-1.39013	2.77248e-10	4.50999e-08
ENSCPOG00000012272	9.17982	17.0248	1.33487	0.0784073	-3.67287	2.85134e-10	4.59367e-08	TTC24	tetratricopeptide repeat domain 24 [Source:HGNC Symbol;Acc:32348]
ENSCPOG00000005215	19.2756	34.2126	4.33865	0.126814	-2.97921	3.51111e-10	5.60273e-08	BLK	B lymphoid tyrosine kinase [Source:HGNC Symbol;Acc:1057]
ENSCPOG00000021204	109.848	27.5653	192.131	6.97003	2.80116	3.62865e-10	5.73566e-08
ENSCPOG00000004712	525.224	280.979	769.469	2.73853	1.4534	3.82014e-10	5.9819e-08	ASNSD1	asparagine synthetase domain containing 1 [Source:HGNC Symbol;Acc:24910]
ENSCPOG00000011658	669.864	945.002	394.727	0.4177	-1.25946	4.07347e-10	6.29485e-08	GPR83	G protein-coupled receptor 83 [Source:HGNC Symbol;Acc:4523]
ENSCPOG00000010613	308.196	177.296	439.095	2.47661	1.30837	4.09513e-10	6.29485e-08	NAGLU	N-acetylglucosaminidase, alpha [Source:HGNC Symbol;Acc:7632]
ENSCPOG00000012316	22.8618	2.35855	43.3651	18.3864	4.20056	4.42919e-10	6.74646e-08	PKP3	plakophilin 3 [Source:HGNC Symbol;Acc:9025]
ENSCPOG00000007659	1174.46	1559.85	789.058	0.505854	-0.983206	5.692e-10	8.59184e-08
ENSCPOG00000008604	1298.94	773.427	1824.46	2.35893	1.23813	5.85007e-10	8.7516e-08	PYGM	phosphorylase, glycogen, muscle [Source:HGNC Symbol;Acc:9726]
ENSCPOG00000020852	35.1144	13.4667	56.7622	4.21501	2.07553	6.98174e-10	1.03521e-07
ENSCPOG00000012188	107.337	156.147	58.5261	0.374815	-1.41575	7.87873e-10	1.15797e-07	RPL26L1	ribosomal protein L26-like 1 [Source:HGNC Symbol;Acc:17050]
ENSCPOG00000007794	76.613	120.137	33.0893	0.27543	-1.86024	8.69786e-10	1.26724e-07	ANKMY1	ankyrin repeat and MYND domain containing 1 [Source:HGNC Symbol;Acc:20987]
ENSCPOG00000014975	12.0068	2.01989	21.9938	10.8886	3.44474	9.06794e-10	1.30977e-07	SERHL2	serine hydrolase-like 2 [Source:HGNC Symbol;Acc:29446]
ENSCPOG00000002760	158.316	224.303	92.3293	0.411627	-1.28059	1.0304e-09	1.47559e-07	TDRD9	tudor domain containing 9 [Source:HGNC Symbol;Acc:20122]
ENSCPOG00000003797	278.25	396.63	159.87	0.403071	-1.31089	1.04001e-09	1.47673e-07	FOLH1	folate hydrolase (prostate-specific membrane antigen) 1 [Source:HGNC Symbol;Acc:3788]
ENSCPOG00000008153	33.8268	11.2484	56.4051	5.01449	2.3261	1.16225e-09	1.63642e-07	HSD17B14	hydroxysteroid (17-beta) dehydrogenase 14 [Source:HGNC Symbol;Acc:23238]
ENSCPOG00000009536	256.873	358.199	155.547	0.434246	-1.20342	1.30882e-09	1.82743e-07	LRRC40	leucine rich repeat containing 40 [Source:HGNC Symbol;Acc:26004]
ENSCPOG00000024153	66.5967	30.6941	102.499	3.33939	1.73958	1.41939e-09	1.96545e-07
ENSCPOG00000023910	4.0538	0	8.10759	Inf	Inf	1.47232e-09	2.02203e-07
ENSCPOG00000024803	23.917	41.0746	6.75931	0.164562	-2.6033	1.51876e-09	2.06885e-07	ALS2CR12	amyotrophic lateral sclerosis 2 (juvenile) chromosome region, candidate 12 [Source:HGNC Symbol;Acc:14439]
ENSCPOG00000009741	10.4974	19.3011	1.69368	0.0877505	-3.51045	1.82426e-09	2.46495e-07	ODF3	outer dense fiber of sperm tails 3 [Source:HGNC Symbol;Acc:19905]
ENSCPOG00000005057	11.2056	21.157	1.25424	0.0592827	-4.07624	1.85373e-09	2.47613e-07		beta-3 adrenergic receptor [Source:RefSeq peptide;Acc:NP_001166358]
ENSCPOG00000022135	239.819	346.485	133.154	0.384299	-1.3797	1.86208e-09	2.47613e-07
ENSCPOG00000004264	92.7826	140.547	45.0177	0.320303	-1.64249	1.96253e-09	2.57846e-07	GLDN	gliomedin [Source:HGNC Symbol;Acc:29514]
ENSCPOG00000010415	381.022	162.578	599.465	3.68725	1.88255	1.96982e-09	2.57846e-07	Serpinf1	pigment epithelium-derived factor [Source:RefSeq peptide;Acc:NP_001166531]
ENSCPOG00000003588	11.9083	21.8642	1.95234	0.0892938	-3.4853	2.20239e-09	2.86055e-07	SPATS1	spermatogenesis associated, serine-rich 1 [Source:HGNC Symbol;Acc:22957]
ENSCPOG00000014872	34.3176	58.702	9.93327	0.169215	-2.56307	2.60626e-09	3.35907e-07	ABHD12B	abhydrolase domain containing 12B [Source:HGNC Symbol;Acc:19837]
ENSCPOG00000011536	96.8128	145.824	47.8021	0.327808	-1.60908	2.75631e-09	3.52035e-07	Q8K3M3_CAVPO	Sulphonylurea receptor 2 [Source:UniProtKB/TrEMBL;Acc:Q8K3M3]
ENSCPOG00000021947	76.2057	14.6844	137.727	9.37915	3.22946	2.77342e-09	3.52035e-07
ENSCPOG00000015313	81.4395	122.858	40.0209	0.325749	-1.61817	2.93644e-09	3.68314e-07
ENSCPOG00000012262	96.5206	143.78	49.2614	0.342617	-1.54533	2.94563e-09	3.68314e-07
ENSCPOG00000020197	376.662	241.551	511.774	2.1187	1.08318	3.04967e-09	3.78498e-07	DOK7	docking protein 7 [Source:HGNC Symbol;Acc:26594]
ENSCPOG00000002115	506.998	300.38	713.617	2.37571	1.24836	3.3797e-09	4.16374e-07
ENSCPOG00000025035	187.059	301.832	72.2869	0.239494	-2.06194	3.67638e-09	4.49288e-07
ENSCPOG00000020090	57.3381	24.9828	89.6935	3.59021	1.84407	3.70049e-09	4.49288e-07
ENSCPOG00000002661	204.522	291.704	117.339	0.402252	-1.31383	3.87939e-09	4.67619e-07	RTTN	rotatin [Source:HGNC Symbol;Acc:18654]
ENSCPOG00000009718	25.2901	41.2532	9.32701	0.226092	-2.14502	4.03617e-09	4.83043e-07	ACOT12	acyl-CoA thioesterase 12 [Source:HGNC Symbol;Acc:24436]
ENSCPOG00000023919	134.078	193.844	74.3111	0.383354	-1.38325	4.21758e-09	5.01174e-07
ENSCPOG00000010945	6.26354	0.478212	12.0489	25.1957	4.6551	5.13355e-09	6.05723e-07	TNMD	tenomodulin [Source:HGNC Symbol;Acc:17757]
ENSCPOG00000010115	14.963	28.1407	1.7853	0.063442	-3.97842	5.48699e-09	6.42899e-07
ENSCPOG00000008403	115.671	65.4431	165.898	2.535	1.34199	6.07381e-09	7.05946e-07
ENSCPOG00000003629	21.7517	5.81559	37.6878	6.48047	2.6961	6.10935e-09	7.05946e-07
ENSCPOG00000002834	60.8327	91.6837	29.9817	0.327012	-1.61258	6.29338e-09	7.17489e-07	C8G	complement component 8, gamma polypeptide [Source:HGNC Symbol;Acc:1354]
ENSCPOG00000011649	5.2981	10.5962	0	0	#NAME?	6.29489e-09	7.17489e-07	LRRIQ4	leucine-rich repeats and IQ motif containing 4 [Source:HGNC Symbol;Acc:34298]
ENSCPOG00000006873	75.2346	114.655	35.8146	0.312369	-1.67868	7.50881e-09	8.50069e-07	ABCC12	ATP-binding cassette, sub-family C (CFTR/MRP), member 12 [Source:HGNC Symbol;Acc:14640]
ENSCPOG00000000941	56.2944	93.1481	19.4406	0.208707	-2.26045	7.84235e-09	8.81869e-07	GLB1L3	galactosidase, beta 1-like 3 [Source:HGNC Symbol;Acc:25147]
ENSCPOG00000003754	5.80498	11.61	0	0	#NAME?	8.51172e-09	9.50759e-07	C2orf70	chromosome 2 open reading frame 70 [Source:HGNC Symbol;Acc:27938]
ENSCPOG00000009624	87.3242	129.51	45.1388	0.348536	-1.52062	8.57738e-09	9.51748e-07	C12orf55	chromosome 12 open reading frame 55 [Source:HGNC Symbol;Acc:26456]
ENSCPOG00000008366	1468.56	1996.47	940.648	0.471156	-1.08572	8.98387e-09	9.90295e-07	DOCK8	dedicator of cytokinesis 8 [Source:HGNC Symbol;Acc:19191]
ENSCPOG00000009723	213.923	296.447	131.398	0.443244	-1.17383	1.29652e-08	1.41981e-06	PLCE1	phospholipase C, epsilon 1 [Source:HGNC Symbol;Acc:17175]
ENSCPOG00000000571	32.8362	13.4473	52.2252	3.88368	1.95742	1.3554e-08	1.47466e-06	SDR16C5	short chain dehydrogenase/reductase family 16C, member 5 [Source:HGNC Symbol;Acc:30311]
ENSCPOG00000019668	603.143	830.604	375.682	0.4523	-1.14465	1.38427e-08	1.49635e-06	Q91Y83_CAVPO	glutathione S-transferase Mu 2 [Source:RefSeq peptide;Acc:NP_001166305]
ENSCPOG00000024598	82.0217	37.0296	127.014	3.43006	1.77823	1.50916e-08	1.61932e-06	HSPB8	heat shock 22kDa protein 8 [Source:HGNC Symbol;Acc:30171]
ENSCPOG00000020566	236.088	332.355	139.821	0.420698	-1.24914	1.51736e-08	1.61932e-06
ENSCPOG00000024199	122.93	67.5622	178.298	2.63902	1.4	1.68785e-08	1.7845e-06	HIF3A	hypoxia inducible factor 3, alpha subunit [Source:HGNC Symbol;Acc:15825]
ENSCPOG00000013015	209.015	299.843	118.187	0.394164	-1.34313	1.70831e-08	1.7845e-06	CP	ceruloplasmin (ferroxidase) [Source:HGNC Symbol;Acc:2295]
ENSCPOG00000024647	25.3258	46.9233	3.72833	0.0794558	-3.6537	1.71019e-08	1.7845e-06	PRR22	proline rich 22 [Source:HGNC Symbol;Acc:28354]
ENSCPOG00000013257	313.124	425.233	201.015	0.472717	-1.08095	1.71474e-08	1.7845e-06	GPR45	G protein-coupled receptor 45 [Source:HGNC Symbol;Acc:4503]
ENSCPOG00000009350	475.591	642.307	308.876	0.480886	-1.05623	1.78642e-08	1.84762e-06	ARHGAP17	Rho GTPase activating protein 17 [Source:HGNC Symbol;Acc:18239]
ENSCPOG00000010480	59.7333	92.3053	27.1614	0.294256	-1.76486	1.81976e-08	1.87056e-06	VEPH1	ventricular zone expressed PH domain homolog 1 (zebrafish) [Source:HGNC Symbol;Acc:25735]
ENSCPOG00000023671	5.59445	10.974	0.214909	0.0195835	-5.67422	1.93723e-08	1.97916e-06
ENSCPOG00000025373	89.0552	45.3038	132.807	2.93147	1.55162	1.96779e-08	1.99821e-06
ENSCPOG00000012742	9.63509	1.76183	17.5084	9.93759	3.3129	2.00443e-08	2.02315e-06	ODF1	outer dense fiber of sperm tails 1 [Source:HGNC Symbol;Acc:8113]
ENSCPOG00000010817	39.4289	61.709	17.1488	0.277898	-1.84737	2.02927e-08	2.03595e-06	PLB1_CAVPO	Phospholipase B1, membrane-associated Phospholipase A2 Lysophospholipase [Source:UniProtKB/Swiss-Prot;Acc:O70320]
ENSCPOG00000006716	1566.38	2067.05	1065.7	0.515567	-0.955769	2.46867e-08	2.45814e-06
ENSCPOG00000013075	40.3051	5.83799	74.7722	12.8079	3.67896	2.47942e-08	2.45814e-06	MUSK	muscle, skeletal, receptor tyrosine kinase [Source:HGNC Symbol;Acc:7525]
ENSCPOG00000022711	182.452	247.976	116.929	0.471533	-1.08457	2.78975e-08	2.73674e-06
ENSCPOG00000023389	21.03	6.27401	35.7859	5.70384	2.51193	2.79309e-08	2.73674e-06	TMEM119	transmembrane protein 119 [Source:HGNC Symbol;Acc:27884]
ENSCPOG00000025545	25.1819	7.63815	42.7258	5.59373	2.48381	2.83382e-08	2.7605e-06	CASP14	caspase 14, apoptosis-related cysteine peptidase [Source:HGNC Symbol;Acc:1502]
ENSCPOG00000000508	74.2109	112.042	36.3797	0.324696	-1.62284	2.87607e-08	2.78547e-06	TRAF5	TNF receptor-associated factor 5 [Source:HGNC Symbol;Acc:12035]
ENSCPOG00000011737	19.8632	5.59903	34.1273	6.09522	2.60768	3.11062e-08	2.99531e-06	C11orf70	chromosome 11 open reading frame 70 [Source:HGNC Symbol;Acc:28188]
ENSCPOG00000012896	124.451	69.0386	179.863	2.60525	1.38142	3.36464e-08	3.2214e-06	CREB3L4	cAMP responsive element binding protein 3-like 4 [Source:HGNC Symbol;Acc:18854]
ENSCPOG00000001541	39.0997	59.0039	19.1955	0.325326	-1.62004	3.52542e-08	3.35616e-06	ARID3C	AT rich interactive domain 3C (BRIGHT-like) [Source:HGNC Symbol;Acc:21209]
ENSCPOG00000010052	333.078	462.456	203.699	0.440473	-1.18288	3.75872e-08	3.55804e-06	TCAP	titin-cap (telethonin) [Source:HGNC Symbol;Acc:11610]
ENSCPOG00000012992	50.1342	23.4685	76.7999	3.27247	1.71038	3.96113e-08	3.72858e-06	ZMYND12	zinc finger, MYND-type containing 12 [Source:HGNC Symbol;Acc:21192]
ENSCPOG00000010905	20.0588	4.80188	35.3158	7.35457	2.87864	4.02871e-08	3.77101e-06	LTF	lactotransferrin [Source:HGNC Symbol;Acc:6720]
ENSCPOG00000005033	229.118	320.562	137.673	0.429476	-1.21935	4.38827e-08	4.08475e-06	STX3	syntaxin 3 [Source:HGNC Symbol;Acc:11438]
ENSCPOG00000023422	18.3269	30.7722	5.88166	0.191135	-2.38733	4.46671e-08	4.11355e-06
ENSCPOG00000026070	62.5459	29.2082	95.8836	3.28277	1.71491	4.46831e-08	4.11355e-06	RABEPK	Rab9 effector protein with kelch motifs [Source:HGNC Symbol;Acc:16896]
ENSCPOG00000024348	14.9948	25.6731	4.31656	0.168136	-2.5723	4.51093e-08	4.13009e-06
ENSCPOG00000011555	94.7693	51.1009	138.438	2.70911	1.43782	4.57845e-08	4.16912e-06	CCDC80	coiled-coil domain containing 80 [Source:HGNC Symbol;Acc:30649]
ENSCPOG00000005850	351.874	472.7	231.049	0.488785	-1.03273	4.7858e-08	4.32821e-06
ENSCPOG00000008443	8.40104	15.0777	1.72433	0.114363	-3.12831	4.80482e-08	4.32821e-06
ENSCPOG00000020410	12.1916	22.1734	2.20981	0.0996607	-3.32683	5.79066e-08	5.18837e-06
ENSCPOG00000011490	5.63423	0.547149	10.7213	19.5949	4.2924	5.88019e-08	5.23539e-06
ENSCPOG00000004440	136.125	194.329	77.922	0.40098	-1.3184	5.90563e-08	5.23539e-06	NEK10	NIMA (never in mitosis gene a)- related kinase 10 [Source:HGNC Symbol;Acc:18592]
ENSCPOG00000011143	162.133	100.147	224.118	2.23788	1.16214	6.50307e-08	5.73468e-06	MEGF6	multiple EGF-like-domains 6 [Source:HGNC Symbol;Acc:3232]
ENSCPOG00000015130	325.186	201.073	449.3	2.23452	1.15996	6.60307e-08	5.79237e-06	TRIM65	tripartite motif containing 65 [Source:HGNC Symbol;Acc:27316]
ENSCPOG00000002848	143.363	85.0002	201.726	2.37324	1.24686	6.69664e-08	5.84387e-06	GPN2	GPN-loop GTPase 2 [Source:HGNC Symbol;Acc:25513]
ENSCPOG00000010225	8.88616	16.0868	1.68552	0.104776	-3.25461	6.73753e-08	5.84909e-06	C14orf159	chromosome 14 open reading frame 159 [Source:HGNC Symbol;Acc:20498]
ENSCPOG00000027142	15.3953	0.57365	30.217	52.675	5.71905	6.91791e-08	5.97472e-06	MPO	myeloperoxidase [Source:HGNC Symbol;Acc:7218]
ENSCPOG00000012270	127	181.454	72.5453	0.3998	-1.32265	6.97584e-08	5.99386e-06	C1orf112	chromosome 1 open reading frame 112 [Source:HGNC Symbol;Acc:25565]
ENSCPOG00000005826	498.136	146.972	849.3	5.77866	2.53073	7.04817e-08	6.01553e-06	S100A1	S100 calcium binding protein A1 [Source:HGNC Symbol;Acc:10486]
ENSCPOG00000000070	100.581	56.9975	144.165	2.52932	1.33875	7.07287e-08	6.01553e-06	PIWIL4	piwi-like 4 (Drosophila) [Source:HGNC Symbol;Acc:18444]
ENSCPOG00000006680	95.9187	54.8276	137.01	2.49892	1.32131	7.197e-08	6.09019e-06
ENSCPOG00000025284	1442.96	1871.64	1014.27	0.541915	-0.883861	7.25009e-08	6.10429e-06	CCKBR	cholecystokinin B receptor [Source:HGNC Symbol;Acc:1571]
ENSCPOG00000027258	14.1653	4.33631	23.9942	5.53334	2.46815	7.30518e-08	6.11991e-06	MIS18A	MIS18 kinetochore protein homolog A (S. pombe) [Source:HGNC Symbol;Acc:1286]
ENSCPOG00000011177	356.387	234.008	478.765	2.04593	1.03276	7.47178e-08	6.22834e-06	MRC2	mannose receptor, C type 2 [Source:HGNC Symbol;Acc:16875]
ENSCPOG00000003616	61.7034	10.6833	112.724	10.5513	3.39935	7.56435e-08	6.27429e-06	SPATA9	spermatogenesis associated 9 [Source:HGNC Symbol;Acc:22988]
ENSCPOG00000017432	46885.1	23548.7	70221.6	2.98197	1.57627	7.91862e-08	6.4973e-06	Q9TEF9_CAVPO	cytochrome b [Source:RefSeq peptide;Acc:NP_008763]
ENSCPOG00000014146	71.6815	106.012	37.3508	0.352326	-1.50502	7.92563e-08	6.4973e-06	C11orf54	chromosome 11 open reading frame 54 [Source:HGNC Symbol;Acc:30204]
ENSCPOG00000019997	5.84626	0.599575	11.0929	18.5014	4.20956	7.94955e-08	6.4973e-06	5S_rRNA	5S ribosomal RNA [Source:RFAM;Acc:RF00001]
ENSCPOG00000014843	24.7006	41.1248	8.27649	0.201253	-2.31292	8.05844e-08	6.55433e-06	ST8SIA6	ST8 alpha-N-acetyl-neuraminide alpha-2,8-sialyltransferase 6 [Source:HGNC Symbol;Acc:23317]
ENSCPOG00000013438	5.01834	9.87369	0.162999	0.0165084	-5.92066	8.15692e-08	6.60238e-06	TGM5	transglutaminase 5 [Source:HGNC Symbol;Acc:11781]
ENSCPOG00000001259	333.049	478.614	187.485	0.391725	-1.35209	8.60848e-08	6.93438e-06	COL24A1	collagen, type XXIV, alpha 1 [Source:HGNC Symbol;Acc:20821]
ENSCPOG00000004776	872.845	371.139	1374.55	3.7036	1.88893	8.82838e-08	7.07748e-06	ABCD4	ATP-binding cassette, sub-family D (ALD), member 4 [Source:HGNC Symbol;Acc:68]
ENSCPOG00000022117	111.742	162.882	60.602	0.37206	-1.42639	9.1371e-08	7.2901e-06
ENSCPOG00000023122	56.5447	4.03287	109.057	27.042	4.75713	9.22246e-08	7.32333e-06	CCDC73	coiled-coil domain containing 73 [Source:HGNC Symbol;Acc:23261]
ENSCPOG00000020035	169.666	99.7256	239.607	2.40267	1.26464	9.50315e-08	7.51063e-06	ARL16	ADP-ribosylation factor-like 16 [Source:HGNC Symbol;Acc:27902]
ENSCPOG00000012251	79.9734	41.3832	118.564	2.86502	1.51854	9.95101e-08	7.82766e-06	SARDH	sarcosine dehydrogenase [Source:HGNC Symbol;Acc:10536]
ENSCPOG00000003371	115.447	59.2787	171.616	2.89508	1.5336	1.20323e-07	9.42062e-06	STAB2	stabilin 2 [Source:HGNC Symbol;Acc:18629]
ENSCPOG00000026977	47.8481	8.10193	87.5943	10.8115	3.4345	1.32673e-07	1.03392e-05	CCNB2	cyclin B2 [Source:HGNC Symbol;Acc:1580]
ENSCPOG00000014866	179.948	253.673	106.223	0.418741	-1.25587	1.54644e-07	1.19957e-05	PRKCQ	protein kinase C, theta [Source:HGNC Symbol;Acc:9410]
ENSCPOG00000015020	33.6277	57.2412	10.0141	0.174946	-2.51501	1.58866e-07	1.22663e-05
ENSCPOG00000020673	4.69424	9.17357	0.214909	0.0234269	-5.41569	1.618e-07	1.24356e-05
ENSCPOG00000003356	72.7645	33.3644	112.165	3.3618	1.74924	1.69311e-07	1.29534e-05	RP1L1	retinitis pigmentosa 1-like 1 [Source:HGNC Symbol;Acc:15946]
ENSCPOG00000006209	180.155	245.017	115.293	0.470553	-1.08757	1.79372e-07	1.36608e-05	HMGCLL1	3-hydroxymethyl-3-methylglutaryl-CoA lyase-like 1 [Source:HGNC Symbol;Acc:21359]
ENSCPOG00000001245	255.343	84.8086	425.878	5.02164	2.32816	1.85004e-07	1.4026e-05	LCTL	lactase-like [Source:HGNC Symbol;Acc:15583]
ENSCPOG00000022977	46.875	75.9777	17.7723	0.233915	-2.09595	1.96511e-07	1.48313e-05
ENSCPOG00000013021	14.6697	25.196	4.14353	0.164452	-2.60426	1.98634e-07	1.49243e-05	TM4SF18	transmembrane 4 L six family member 18 [Source:HGNC Symbol;Acc:25181]
ENSCPOG00000003656	60.4014	88.2949	32.5079	0.368174	-1.44154	2.08629e-07	1.56052e-05	SYTL4	synaptotagmin-like 4 [Source:HGNC Symbol;Acc:15588]
ENSCPOG00000007450	132.818	82.0895	183.546	2.23592	1.16087	2.47966e-07	1.84652e-05	LRRC6	leucine rich repeat containing 6 [Source:HGNC Symbol;Acc:16725]
ENSCPOG00000003346	63.3889	33.8651	92.9127	2.74361	1.45608	2.55544e-07	1.89453e-05	NKD2	naked cuticle homolog 2 (Drosophila) [Source:HGNC Symbol;Acc:17046]
ENSCPOG00000004029	150.207	205.984	94.4295	0.458432	-1.12522	2.58428e-07	1.90747e-05	ACSM5	acyl-CoA synthetase medium-chain family member 5 [Source:HGNC Symbol;Acc:26060]
ENSCPOG00000019958	244.045	336.335	151.755	0.451201	-1.14816	2.82757e-07	2.07789e-05	WDR17	WD repeat domain 17 [Source:HGNC Symbol;Acc:16661]
ENSCPOG00000018758	25.836	10.8056	40.8664	3.78198	1.91914	2.97939e-07	2.1799e-05	SNORD91	Small nucleolar RNA SNORD91 family [Source:RFAM;Acc:RF00580]
ENSCPOG00000002615	22.1343	36.8825	7.38611	0.20026	-2.32005	3.02049e-07	2.20036e-05
ENSCPOG00000015458	156.631	95.0504	218.211	2.29574	1.19896	3.19904e-07	2.32035e-05	EFCAB7	EF-hand calcium binding domain 7 [Source:HGNC Symbol;Acc:29379]
ENSCPOG00000025631	990.289	1275.69	704.887	0.552552	-0.855817	3.23902e-07	2.33922e-05	SLC48A1	solute carrier family 48 (heme transporter), member 1 [Source:HGNC Symbol;Acc:26035]
ENSCPOG00000026067	6.48772	0.643084	12.3324	19.1769	4.2613	3.35216e-07	2.41053e-05
ENSCPOG00000004786	198.046	270.297	125.794	0.465394	-1.10348	3.57796e-07	2.56191e-05
ENSCPOG00000021624	19.6904	6.86605	32.5147	4.73557	2.24354	3.72578e-07	2.6564e-05	COL20A1	collagen, type XX, alpha 1 [Source:HGNC Symbol;Acc:14670]
ENSCPOG00000025515	440.703	657.366	224.04	0.340815	-1.55294	3.86263e-07	2.74231e-05	CIDEA	cell death-inducing DFFA-like effector a [Source:HGNC Symbol;Acc:1976]
ENSCPOG00000022824	390.642	515.332	265.951	0.516077	-0.954341	4.12828e-07	2.91853e-05
ENSCPOG00000007014	109.195	66.8103	151.58	2.26881	1.18194	4.1981e-07	2.95542e-05
ENSCPOG00000007799	38.8136	18.8871	58.74	3.11006	1.63694	4.25844e-07	2.98536e-05	AMPD3	adenosine monophosphate deaminase 3 [Source:HGNC Symbol;Acc:470]
ENSCPOG00000008124	147.101	207.745	86.456	0.416164	-1.26478	4.29633e-07	2.98702e-05	C1QB	complement component 1, q subcomponent, B chain [Source:HGNC Symbol;Acc:1242]
ENSCPOG00000026259	25.2605	5.73614	44.7848	7.80749	2.96486	4.29646e-07	2.98702e-05	STRA6	stimulated by retinoic acid gene 6 homolog (mouse) [Source:HGNC Symbol;Acc:30650]
ENSCPOG00000014157	58.087	30.2816	85.8924	2.83646	1.50409	4.58211e-07	3.17245e-05	WDR78	WD repeat domain 78 [Source:HGNC Symbol;Acc:26252]
ENSCPOG00000013000	95.1386	58.9439	131.333	2.22811	1.15582	4.81496e-07	3.31994e-05	CASR	calcium-sensing receptor [Source:HGNC Symbol;Acc:1514]
ENSCPOG00000023960	140.151	86.0733	194.228	2.25654	1.17411	4.91329e-07	3.37386e-05
ENSCPOG00000004148	259.92	165.094	354.745	2.14874	1.10349	5.02042e-07	3.43336e-05	SLC6A16	solute carrier family 6, member 16 [Source:HGNC Symbol;Acc:13622]
ENSCPOG00000002058	95.0501	133.216	56.884	0.427005	-1.22768	5.12792e-07	3.49261e-05	KL	klotho [Source:HGNC Symbol;Acc:6344]
ENSCPOG00000008105	167.722	105.401	230.043	2.18255	1.12602	5.24223e-07	3.55601e-05	FYCO1	FYVE and coiled-coil domain containing 1 [Source:HGNC Symbol;Acc:14673]
ENSCPOG00000002923	186.148	67.9134	304.382	4.48191	2.16411	5.3368e-07	3.60557e-05	TRPT1	tRNA phosphotransferase 1 [Source:HGNC Symbol;Acc:20316]
ENSCPOG00000014611	18.0906	27.9947	8.18653	0.292432	-1.77383	5.41055e-07	3.64072e-05	C22orf15	chromosome 22 open reading frame 15 [Source:HGNC Symbol;Acc:15558]
ENSCPOG00000004895	26.3403	6.22564	46.4549	7.46186	2.89954	5.47409e-07	3.66874e-05	EPOR	erythropoietin receptor [Source:HGNC Symbol;Acc:3416]
ENSCPOG00000008326	17.7154	29.4584	5.97241	0.202741	-2.30229	6.45495e-07	4.30887e-05	DDX60	DEAD (Asp-Glu-Ala-Asp) box polypeptide 60 [Source:HGNC Symbol;Acc:25942]
ENSCPOG00000019665	146.42	202.242	90.598	0.447968	-1.15853	6.63475e-07	4.41132e-05
ENSCPOG00000009541	8.01417	0.402931	15.6254	38.7794	5.27722	6.71244e-07	4.44534e-05	ACTL8	actin-like 8 [Source:HGNC Symbol;Acc:24018]
ENSCPOG00000021309	32.3187	49.6355	15.0019	0.302242	-1.72623	6.75337e-07	4.45483e-05	TMEM44	transmembrane protein 44 [Source:HGNC Symbol;Acc:25120]
ENSCPOG00000005613	269.615	181.604	357.626	1.96926	0.977655	6.84185e-07	4.4955e-05	IGFBP6	insulin-like growth factor binding protein 6 [Source:HGNC Symbol;Acc:5475]
ENSCPOG00000005962	18.6468	31.2164	6.07723	0.194681	-2.36082	7.16711e-07	4.69082e-05	KIF6	kinesin family member 6 [Source:HGNC Symbol;Acc:21202]
ENSCPOG00000005634	56.244	30.7194	81.7687	2.66179	1.4124	7.61435e-07	4.96414e-05	Q0PIU3_CAVPO	Transforming growth factor b3 [Source:UniProtKB/TrEMBL;Acc:Q0PIU3]
ENSCPOG00000015047	129.07	174.788	83.3516	0.476874	-1.06832	7.7641e-07	5.04215e-05	A4L9L7_CAVPO	gamma-crystallin A [Source:RefSeq peptide;Acc:NP_001166565]
ENSCPOG00000013646	80.8988	118.281	43.5165	0.367907	-1.44259	8.07729e-07	5.22529e-05	KCNS1	potassium voltage-gated channel, delayed-rectifier, subfamily S, member 1 [Source:HGNC Symbol;Acc:6300]
ENSCPOG00000012803	57.0171	29.0333	85.001	2.92771	1.54977	8.19047e-07	5.27813e-05	AGTRAP	angiotensin II receptor-associated protein [Source:HGNC Symbol;Acc:13539]
ENSCPOG00000021098	64.8337	90.3504	39.317	0.435161	-1.20038	8.27228e-07	5.31042e-05
ENSCPOG00000023406	72.0267	105.979	38.0747	0.359268	-1.47687	9.42323e-07	6.02619e-05
ENSCPOG00000014782	39.7439	59.2239	20.264	0.342158	-1.54726	1.07401e-06	6.84221e-05	SLC44A4	solute carrier family 44, member 4 [Source:HGNC Symbol;Acc:13941]
ENSCPOG00000007491	11.5101	3.30224	19.7179	5.97107	2.57799	1.18449e-06	7.51745e-05	FOSL1	FOS-like antigen 1 [Source:HGNC Symbol;Acc:13718]
ENSCPOG00000014563	66.653	97.0674	36.2385	0.373334	-1.42146	1.24531e-06	7.87363e-05	MRE11A	MRE11 meiotic recombination 11 homolog A (S. cerevisiae) [Source:HGNC Symbol;Acc:7230]
ENSCPOG00000014887	34.4856	15.915	53.0562	3.33373	1.73714	1.27329e-06	8.02027e-05	SLC26A8	solute carrier family 26, member 8 [Source:HGNC Symbol;Acc:14468]
ENSCPOG00000010556	8.97296	16.1752	1.77075	0.109473	-3.19135	1.28815e-06	8.08348e-05	STEAP4	STEAP family member 4 [Source:HGNC Symbol;Acc:21923]
ENSCPOG00000010402	494.561	629.357	359.764	0.571637	-0.806828	1.30937e-06	8.18603e-05	SHFM1	split hand/foot malformation (ectrodactyly) type 1 [Source:HGNC Symbol;Acc:10845]
ENSCPOG00000006086	44.7942	18.4003	71.1882	3.86886	1.95191	1.36719e-06	8.51569e-05	MPL	myeloproliferative leukemia virus oncogene [Source:HGNC Symbol;Acc:7217]
ENSCPOG00000019927	216.4	118.455	314.346	2.65373	1.40802	1.40502e-06	8.71894e-05
ENSCPOG00000029273	42.1696	63.3641	20.9751	0.331025	-1.59499	1.42553e-06	8.81355e-05	U6	U6 spliceosomal RNA [Source:RFAM;Acc:RF00026]
ENSCPOG00000009466	251.078	165.985	336.172	2.02531	1.01815	1.43601e-06	8.84571e-05	SLC27A3	solute carrier family 27 (fatty acid transporter), member 3 [Source:HGNC Symbol;Acc:10997]
ENSCPOG00000025708	24.842	10.4956	39.1883	3.73378	1.90064	1.44402e-06	8.86247e-05	CCDC48	coiled-coil domain containing 48 [Source:HGNC Symbol;Acc:25692]
ENSCPOG00000003223	38.2736	59.9859	16.5612	0.276084	-1.85682	1.56949e-06	9.59736e-05	DNAH1	dynein, axonemal, heavy chain 1 [Source:HGNC Symbol;Acc:2940]
ENSCPOG00000006835	49.0571	19.6777	78.4364	3.98605	1.99496	1.5826e-06	9.64237e-05	EPS8L1	EPS8-like 1 [Source:HGNC Symbol;Acc:21295]
ENSCPOG00000024286	163.42	217.032	109.808	0.505952	-0.982928	1.69541e-06	0.000102922	ALS2CL	ALS2 C-terminal like [Source:HGNC Symbol;Acc:20605]
ENSCPOG00000008387	1719.4	1198.82	2239.98	1.86849	0.901871	1.74432e-06	0.00010551	GSN	gelsolin [Source:HGNC Symbol;Acc:4620]
ENSCPOG00000026066	2.89188	5.78377	0	0	#NAME?	1.75862e-06	0.000105992	SNORA12	Small nucleolar RNA SNORA12 [Source:RFAM;Acc:RF00586]
ENSCPOG00000006435	27.4585	4.22343	50.6936	12.0029	3.58531	1.78261e-06	0.000107052
ENSCPOG00000003525	101.771	144.957	58.5854	0.404157	-1.30701	1.80361e-06	0.000107927	PLEK	pleckstrin [Source:HGNC Symbol;Acc:9070]
ENSCPOG00000007086	21.9716	8.5743	35.3689	4.12499	2.04439	1.87946e-06	0.000112065	AIM1L	absent in melanoma 1-like [Source:HGNC Symbol;Acc:17295]
ENSCPOG00000008531	36.6531	55.5696	17.7366	0.319178	-1.64757	1.90171e-06	0.00011299	IFIT5	interferon-induced protein with tetratricopeptide repeats 5 [Source:HGNC Symbol;Acc:13328]
ENSCPOG00000026710	5.90582	10.9275	0.884174	0.080913	-3.62748	1.95149e-06	0.000115538
ENSCPOG00000002324	20.9235	34.3569	7.49001	0.218006	-2.19756	1.9586e-06	0.000115551
ENSCPOG00000009066	655.823	315.796	995.851	3.15347	1.65694	2.11484e-06	0.00012433	NUP210	nucleoporin 210kDa [Source:HGNC Symbol;Acc:30052]
ENSCPOG00000026325	1583.65	1109.34	2057.95	1.85511	0.891507	2.27542e-06	0.000133303	PIGT	phosphatidylinositol glycan anchor biosynthesis, class T [Source:HGNC Symbol;Acc:14938]
ENSCPOG00000005346	437.787	250.393	625.182	2.4968	1.32008	2.41937e-06	0.000141242	RPRML	reprimo-like [Source:HGNC Symbol;Acc:32422]
ENSCPOG00000004257	25.5918	44.5701	6.61351	0.148384	-2.75259	2.47107e-06	0.000143432	SLC25A47	solute carrier family 25, member 47 [Source:HGNC Symbol;Acc:20115]
ENSCPOG00000006748	600.104	420.377	779.831	1.85508	0.891478	2.47399e-06	0.000143432	URB1	URB1 ribosome biogenesis 1 homolog (S. cerevisiae) [Source:HGNC Symbol;Acc:17344]
ENSCPOG00000012792	238.055	164.679	311.431	1.89114	0.919253	2.64538e-06	0.000152839	MYOM1	myomesin 1, 185kDa [Source:HGNC Symbol;Acc:7613]
ENSCPOG00000007421	27.9039	42.6942	13.1136	0.307151	-1.70298	2.66037e-06	0.000153177	HFM1	HFM1, ATP-dependent DNA helicase homolog (S. cerevisiae) [Source:HGNC Symbol;Acc:20193]
ENSCPOG00000012848	7.81439	14.0911	1.5377	0.109126	-3.19593	2.89941e-06	0.000166368	BET3L	BET3 like (S. cerevisiae) [Source:HGNC Symbol;Acc:21090]
ENSCPOG00000004283	152.969	102.773	203.165	1.97683	0.98319	2.94367e-06	0.000168332	MRM1	mitochondrial rRNA methyltransferase 1 homolog (S. cerevisiae) [Source:HGNC Symbol;Acc:26202]
ENSCPOG00000002539	1233.76	858.543	1608.97	1.87408	0.906179	3.03843e-06	0.000173159	ZNF142	zinc finger protein 142 [Source:HGNC Symbol;Acc:12927]
ENSCPOG00000014458	26.3359	9.22623	43.4456	4.70892	2.2354	3.04898e-06	0.000173172	RANBP3L	RAN binding protein 3-like [Source:HGNC Symbol;Acc:26353]
ENSCPOG00000006998	217.499	144.494	290.504	2.01049	1.00755	3.06927e-06	0.000173735
ENSCPOG00000014115	19.2128	5.3901	33.0356	6.12894	2.61564	3.14538e-06	0.000177444
ENSCPOG00000004326	49.6905	27.5766	71.8043	2.60381	1.38063	3.29782e-06	0.000185419	SLC1A5	solute carrier family 1 (neutral amino acid transporter), member 5 [Source:HGNC Symbol;Acc:10943]
ENSCPOG00000007826	30.8736	46.3092	15.438	0.333367	-1.58482	3.38338e-06	0.000189593	ADAM32	ADAM metallopeptidase domain 32 [Source:HGNC Symbol;Acc:15479]
ENSCPOG00000026708	23.5993	41.4063	5.79233	0.13989	-2.83763	3.42199e-06	0.000191118
ENSCPOG00000024741	939.665	1243.45	635.883	0.511387	-0.967512	3.51631e-06	0.000195733
ENSCPOG00000010344	75.0041	110.485	39.523	0.357722	-1.48309	3.55235e-06	0.000197085	HK3	hexokinase 3 (white cell) [Source:HGNC Symbol;Acc:4925]
ENSCPOG00000004747	194.205	250.072	138.338	0.553193	-0.854146	3.58102e-06	0.00019802	SH3TC1	SH3 domain and tetratricopeptide repeats 1 [Source:HGNC Symbol;Acc:26009]
ENSCPOG00000015448	124.3	83.3268	165.273	1.98343	0.987996	3.88572e-06	0.000214162	LMLN	leishmanolysin-like (metallopeptidase M8 family) [Source:HGNC Symbol;Acc:15991]
ENSCPOG00000026399	214.736	142.904	286.568	2.00532	1.00384	4.03715e-06	0.000221779	MCAT	malonyl CoA:ACP acyltransferase (mitochondrial) [Source:HGNC Symbol;Acc:29622]
ENSCPOG00000000728	713.418	910.647	516.189	0.566837	-0.818994	4.18053e-06	0.000228905
ENSCPOG00000026738	160.873	107.819	213.928	1.98413	0.988507	4.19434e-06	0.000228913	MFAP4	microfibrillar-associated protein 4 [Source:HGNC Symbol;Acc:7035]
ENSCPOG00000023423	28.5393	43.9656	13.113	0.298257	-1.74537	4.26727e-06	0.000232137
ENSCPOG00000001598	193.266	127.738	258.793	2.02597	1.01861	4.32287e-06	0.0002344	DDX58	DEAD (Asp-Glu-Ala-Asp) box polypeptide 58 [Source:HGNC Symbol;Acc:19102]
ENSCPOG00000015195	206.285	145.856	266.715	1.82862	0.870752	4.37826e-06	0.000236638	SLC22A6	solute carrier family 22 (organic anion transporter), member 6 [Source:HGNC Symbol;Acc:10970]
ENSCPOG00000019478	211.221	139.628	282.815	2.02549	1.01827	4.61593e-06	0.000248222	MRPL41	mitochondrial ribosomal protein L41 [Source:HGNC Symbol;Acc:14492]
ENSCPOG00000017413	58847	37842.9	79851.2	2.11007	1.07729	4.62221e-06	0.000248222	Q9TEG9_CAVPO	cytochrome c oxidase subunit I [Source:RefSeq peptide;Acc:NP_008753]
ENSCPOG00000005895	75.039	107.644	42.4345	0.394213	-1.34295	4.8307e-06	0.000258589
ENSCPOG00000025294	15.413	1.93414	28.8919	14.9379	3.9009	4.89842e-06	0.000261379
ENSCPOG00000010780	330.382	433.392	227.372	0.524633	-0.930621	4.96269e-06	0.000263968	TAF1B	TATA box binding protein (TBP)-associated factor, RNA polymerase I, B, 63kDa [Source:HGNC Symbol;Acc:11533]
ENSCPOG00000011578	246.945	323.008	170.883	0.529037	-0.91856	5.0351e-06	0.000266972	STAMBPL1	STAM binding protein-like 1 [Source:HGNC Symbol;Acc:24105]
ENSCPOG00000013407	319.098	438.562	199.634	0.455202	-1.13542	5.2323e-06	0.000276553	PPP2R1B	protein phosphatase 2, regulatory subunit A, beta [Source:HGNC Symbol;Acc:9303]
ENSCPOG00000005032	32.5459	15.4572	49.6345	3.21108	1.68306	5.47245e-06	0.000288336	QRICH2	glutamine rich 2 [Source:HGNC Symbol;Acc:25326]
ENSCPOG00000026904	94.781	56.6669	132.895	2.3452	1.22971	5.63801e-06	0.000296128	MYO7A	myosin VIIA [Source:HGNC Symbol;Acc:7606]
ENSCPOG00000011758	1165.1	1509.72	820.49	0.543473	-0.879721	5.76975e-06	0.000302101
ENSCPOG00000000492	8.52793	14.7521	2.30371	0.156161	-2.67889	6.05281e-06	0.000315934	CCDC147	coiled-coil domain containing 147 [Source:HGNC Symbol;Acc:26676]
ENSCPOG00000001962	28.7288	43.3311	14.1265	0.326012	-1.617	6.16764e-06	0.000320928	PDE6A	phosphodiesterase 6A, cGMP-specific, rod, alpha [Source:HGNC Symbol;Acc:8785]
ENSCPOG00000005365	245.199	327.534	162.864	0.497242	-1.00798	6.30965e-06	0.000327301	KIAA0146	KIAA0146 [Source:HGNC Symbol;Acc:28971]
ENSCPOG00000011193	9.14241	3.17656	15.1083	4.75617	2.2498	6.67258e-06	0.000345059	2012-03-10	membrane-associated ring finger (C3HC4) 10, E3 ubiquitin protein ligase [Source:HGNC Symbol;Acc:26655]
ENSCPOG00000007549	355.503	464.547	246.46	0.530538	-0.914471	6.7783e-06	0.000349447	BAG3	BCL2-associated athanogene 3 [Source:HGNC Symbol;Acc:939]
ENSCPOG00000013913	6.06084	10.8021	1.31959	0.122161	-3.03315	6.80606e-06	0.000349802	MAGIX	MAGI family member, X-linked [Source:HGNC Symbol;Acc:30006]
ENSCPOG00000020126	16.1537	25.8104	6.49698	0.25172	-1.99011	6.8518e-06	0.000350016
ENSCPOG00000019637	17.6416	6.58008	28.7032	4.36213	2.12503	6.86156e-06	0.000350016
ENSCPOG00000002481	137.85	184.494	91.2072	0.494365	-1.01635	6.87496e-06	0.000350016
ENSCPOG00000013839	18.8904	30.2977	7.48312	0.246986	-2.0175	6.89378e-06	0.000350016	DEPDC1	DEP domain containing 1 [Source:HGNC Symbol;Acc:22949]
ENSCPOG00000000620	11.5294	3.4588	19.6	5.66669	2.50251	6.97445e-06	0.000353042
ENSCPOG00000014114	21.5167	9.53788	33.4954	3.51183	1.81222	7.18736e-06	0.000362723
ENSCPOG00000012749	116.526	166.598	66.4531	0.398882	-1.32597	7.32651e-06	0.000367922	ETAA1	Ewing tumor-associated antigen 1 [Source:HGNC Symbol;Acc:24648]
ENSCPOG00000007526	266.557	160.334	372.781	2.32503	1.21725	7.3343e-06	0.000367922	MSRB2	methionine sulfoxide reductase B2 [Source:HGNC Symbol;Acc:17061]
ENSCPOG00000008437	75.2493	106.134	44.3643	0.418002	-1.25842	7.48233e-06	0.000374228	SNAPC1	small nuclear RNA activating complex, polypeptide 1, 43kDa [Source:HGNC Symbol;Acc:11134]
ENSCPOG00000025782	34.7193	65.3709	4.06766	0.0622243	-4.00638	7.59221e-06	0.00037791	WFIKKN1	WAP, follistatin/kazal, immunoglobulin, kunitz and netrin domain containing 1 [Source:HGNC Symbol;Acc:30912]
ENSCPOG00000001729	16.1508	6.56647	25.7352	3.91919	1.97056	7.60105e-06	0.00037791	LGALS12	lectin, galactoside-binding, soluble, 12 [Source:HGNC Symbol;Acc:15788]
ENSCPOG00000009098	893.486	1129.83	657.144	0.581632	-0.781821	7.7394e-06	0.00038365	ELAC2	elaC homolog 2 (E. coli) [Source:HGNC Symbol;Acc:14198]
ENSCPOG00000007409	12.0421	19.6069	4.47726	0.228352	-2.13067	7.81422e-06	0.000386216	TMEM211	transmembrane protein 211 [Source:HGNC Symbol;Acc:33725]
ENSCPOG00000020906	45.6954	10.6502	80.7407	7.58116	2.92242	7.95235e-06	0.000391887
ENSCPOG00000004804	116.277	159.563	72.9905	0.45744	-1.12835	8.20277e-06	0.000403042	ZAP70	zeta-chain (TCR) associated protein kinase 70kDa [Source:HGNC Symbol;Acc:12858]
ENSCPOG00000004494	228.158	104.567	351.75	3.36387	1.75012	8.23318e-06	0.000403353	RHBDD2	rhomboid domain containing 2 [Source:HGNC Symbol;Acc:23082]
ENSCPOG00000006828	8.2147	2.31279	14.1166	6.10372	2.60969	8.26638e-06	0.0004038	UTS2R	urotensin 2 receptor [Source:HGNC Symbol;Acc:4468]
ENSCPOG00000011316	42.9896	63.0396	22.9396	0.363891	-1.45842	8.31746e-06	0.000405113	RINL	Ras and Rab interactor-like [Source:HGNC Symbol;Acc:24795]
ENSCPOG00000014841	49.6853	74.6176	24.7531	0.331734	-1.5919	8.4787e-06	0.00041177	SOSTDC1	sclerostin domain containing 1 [Source:HGNC Symbol;Acc:21748]
ENSCPOG00000002266	58.0713	32.3718	83.7708	2.58777	1.37171	8.73133e-06	0.000422813	RSPH1	radial spoke head 1 homolog (Chlamydomonas) [Source:HGNC Symbol;Acc:12371]
ENSCPOG00000024918	42.8705	64.2144	21.5266	0.335229	-1.57678	8.87761e-06	0.000428658
ENSCPOG00000027379	8.67702	16.7503	0.603708	0.0360416	-4.7942	8.95577e-06	0.000431189	FAM83C	family with sequence similarity 83, member C [Source:HGNC Symbol;Acc:16121]
ENSCPOG00000011390	420.738	547.634	293.842	0.536567	-0.898171	9.08088e-06	0.00043596	TRPM3	transient receptor potential cation channel, subfamily M, member 3 [Source:HGNC Symbol;Acc:17992]
ENSCPOG00000010266	26.0779	11.0254	41.1303	3.73051	1.89937	9.33033e-06	0.000446656
ENSCPOG00000009448	48.7442	21.9442	75.5443	3.44257	1.78348	9.64381e-06	0.000460348	HAPLN3	hyaluronan and proteoglycan link protein 3 [Source:HGNC Symbol;Acc:21446]
ENSCPOG00000021670	181.249	234.234	128.264	0.547589	-0.868835	9.82601e-06	0.000467384	QRSL1	glutaminyl-tRNA synthase (glutamine-hydrolyzing)-like 1 [Source:HGNC Symbol;Acc:21020]
ENSCPOG00000017419	49880.5	24115.1	75645.8	3.13687	1.64933	9.847e-06	0.000467384	Q9TEG6_CAVPO	ATP synthase F0 subunit 6 [Source:RefSeq peptide;Acc:NP_008756]
ENSCPOG00000019445	61.1343	35.3099	86.9587	2.46273	1.30026	9.96929e-06	0.000471852	ORAI1	ORAI calcium release-activated calcium modulator 1 [Source:HGNC Symbol;Acc:25896]
ENSCPOG00000002589	848.397	605.044	1091.75	1.80441	0.851528	1.03104e-05	0.000486621	RNPEP	arginyl aminopeptidase (aminopeptidase B) [Source:HGNC Symbol;Acc:10078]
ENSCPOG00000007206	122.48	166.161	78.7992	0.474234	-1.07633	1.0754e-05	0.000506133	PRPS2	phosphoribosyl pyrophosphate synthetase 2 [Source:HGNC Symbol;Acc:9465]
ENSCPOG00000000555	133.142	91.7357	174.548	1.90273	0.928069	1.08138e-05	0.00050752	PMS2	PMS2 postmeiotic segregation increased 2 (S. cerevisiae) [Source:HGNC Symbol;Acc:9122]
ENSCPOG00000007840	32.9485	49.9657	15.9314	0.318846	-1.64907	1.09796e-05	0.000513863	ERMAP	erythroblast membrane-associated protein (Scianna blood group) [Source:HGNC Symbol;Acc:15743]
ENSCPOG00000010916	58.6474	33.4132	83.8816	2.51043	1.32793	1.10467e-05	0.000515565	TSSK4	testis-specific serine kinase 4 [Source:HGNC Symbol;Acc:19825]
ENSCPOG00000001780	326.28	235.862	416.698	1.7667	0.82106	1.11907e-05	0.000520833
ENSCPOG00000001012	72.6043	101.558	43.6507	0.429811	-1.21822	1.12612e-05	0.000522299	O88976_CAVPO	Calcitonin receptor-like receptor [Source:UniProtKB/TrEMBL;Acc:O88976]
ENSCPOG00000023657	79.3462	47.9493	110.743	2.30958	1.20763	1.12845e-05	0.000522299	KIAA1683	KIAA1683 [Source:HGNC Symbol;Acc:29350]
ENSCPOG00000010436	218.897	148.205	289.588	1.95397	0.966407	1.14763e-05	0.00052971	BAIAP3	BAI1-associated protein 3 [Source:HGNC Symbol;Acc:948]
ENSCPOG00000007611	66.5287	40.8309	92.2265	2.25874	1.17552	1.18098e-05	0.000543608	ANKRD29	ankyrin repeat domain 29 [Source:HGNC Symbol;Acc:27110]
ENSCPOG00000026323	44.4521	63.5073	25.3969	0.399905	-1.32227	1.19296e-05	0.000547616
ENSCPOG00000004998	60.5874	86.8631	34.3118	0.39501	-1.34004	1.22366e-05	0.000560176	BCHE	butyrylcholinesterase [Source:HGNC Symbol;Acc:983]
ENSCPOG00000000380	9.4472	2.6885	16.2059	6.02785	2.59164	1.22965e-05	0.000561382	C4BPB	complement component 4 binding protein, beta [Source:HGNC Symbol;Acc:1328]
ENSCPOG00000003481	90.8001	56.431	125.169	2.21809	1.14932	1.23449e-05	0.000562061	SDR42E1	short chain dehydrogenase/reductase family 42E, member 1 [Source:HGNC Symbol;Acc:29834]
ENSCPOG00000003337	286.805	200.25	373.361	1.86447	0.898767	1.26853e-05	0.000575993	MKNK1	MAP kinase interacting serine/threonine kinase 1 [Source:HGNC Symbol;Acc:7110]
ENSCPOG00000002763	75.3035	101.858	48.7492	0.4786	-1.06311	1.30868e-05	0.000591976
ENSCPOG00000024839	1133.36	1423.7	843.029	0.592141	-0.755987	1.31419e-05	0.000591976	CARS2	cysteinyl-tRNA synthetase 2, mitochondrial (putative) [Source:HGNC Symbol;Acc:25695]
ENSCPOG00000006826	218.607	278.855	158.358	0.567885	-0.816328	1.31432e-05	0.000591976	THNSL2	threonine synthase-like 2 (S. cerevisiae) [Source:HGNC Symbol;Acc:25602]
ENSCPOG00000025922	189.085	239.45	138.719	0.579321	-0.787564	1.36731e-05	0.000614189	ITGB2	integrin, beta 2 (complement component 3 receptor 3 and 4 subunit) [Source:HGNC Symbol;Acc:6155]
ENSCPOG00000022580	61.147	93.4345	28.8595	0.308875	-1.69491	1.37479e-05	0.000615898
ENSCPOG00000001937	148.619	195.85	101.389	0.517685	-0.949853	1.37992e-05	0.000616548	LCP1	lymphocyte cytosolic protein 1 (L-plastin) [Source:HGNC Symbol;Acc:6528]
ENSCPOG00000005734	32.7097	9.5381	55.8813	5.85874	2.55059	1.38566e-05	0.000617468	USH1G	Usher syndrome 1G (autosomal recessive) [Source:HGNC Symbol;Acc:16356]
ENSCPOG00000013150	240.742	156.795	324.689	2.07079	1.05018	1.4251e-05	0.000633357	TPD52L1	tumor protein D52-like 1 [Source:HGNC Symbol;Acc:12006]
ENSCPOG00000010740	79.1177	47.2434	110.992	2.34937	1.23227	1.44851e-05	0.000642057
ENSCPOG00000010852	53.5556	74.8974	32.2138	0.430105	-1.21724	1.46058e-05	0.0006457	ELMO3	engulfment and cell motility 3 [Source:HGNC Symbol;Acc:17289]
ENSCPOG00000010385	102.796	69.702	135.889	1.94958	0.96316	1.52257e-05	0.000671333	ZRANB3	zinc finger, RAN-binding domain containing 3 [Source:HGNC Symbol;Acc:25249]
ENSCPOG00000011220	11.183	19.1047	3.26127	0.170705	-2.55042	1.53114e-05	0.000672448	KYNU	kynureninase [Source:HGNC Symbol;Acc:6469]
ENSCPOG00000010047	3.01439	5.90988	0.118889	0.0201171	-5.63544	1.53312e-05	0.000672448	TMPRSS11D	transmembrane protease, serine 11D [Source:HGNC Symbol;Acc:24059]
ENSCPOG00000003384	278.095	190.034	366.156	1.92679	0.946202	1.54828e-05	0.000677321	ABHD14A	abhydrolase domain containing 14A [Source:HGNC Symbol;Acc:24538]
ENSCPOG00000008150	65.4931	91.6829	39.3032	0.428686	-1.22201	1.56965e-05	0.00068467	KATNAL2	katanin p60 subunit A-like 2 [Source:HGNC Symbol;Acc:25387]
ENSCPOG00000013663	365.729	460.305	271.154	0.589073	-0.763481	1.57325e-05	0.00068467	ADCK4	aarF domain containing kinase 4 [Source:HGNC Symbol;Acc:19041]
ENSCPOG00000009732	115.773	154.95	76.5948	0.494318	-1.01649	1.60962e-05	0.000698683
ENSCPOG00000021071	29.1897	42.9439	15.4355	0.359433	-1.47621	1.63194e-05	0.000706539	C6orf25	chromosome 6 open reading frame 25 [Source:HGNC Symbol;Acc:13937]
ENSCPOG00000011381	24.1328	34.6529	13.6126	0.392828	-1.34803	1.65625e-05	0.000715219	PPP1R36	protein phosphatase 1, regulatory subunit 36 [Source:HGNC Symbol;Acc:20097]
ENSCPOG00000002171	574.9	714.758	435.042	0.608656	-0.716301	1.69459e-05	0.000729895	EIF2B3	eukaryotic translation initiation factor 2B, subunit 3 gamma, 58kDa [Source:HGNC Symbol;Acc:3259]
ENSCPOG00000024224	8.2692	0.946269	15.5921	16.4775	4.04242	1.72332e-05	0.000740367
ENSCPOG00000002766	181.251	123.192	239.31	1.94258	0.957975	1.73308e-05	0.000742654	ANKRD35	ankyrin repeat domain 35 [Source:HGNC Symbol;Acc:26323]
ENSCPOG00000022705	2640.61	1827.24	3453.98	1.89027	0.91859	1.78885e-05	0.000764596
ENSCPOG00000025987	458.795	263.587	654.004	2.48117	1.31102	1.79524e-05	0.000765374	DUSP23	dual specificity phosphatase 23 [Source:HGNC Symbol;Acc:21480]
ENSCPOG00000022155	21.5321	37.8257	5.23845	0.138489	-2.85215	1.84583e-05	0.000784947
ENSCPOG00000005450	689.497	503.576	875.419	1.73841	0.797766	1.87388e-05	0.000794858	TPCN1	two pore segment channel 1 [Source:HGNC Symbol;Acc:18182]
ENSCPOG00000012877	94.5352	56.8875	132.183	2.32358	1.21635	1.89648e-05	0.000802413	ITGA11	integrin, alpha 11 [Source:HGNC Symbol;Acc:6136]
ENSCPOG00000009752	73.194	107.528	38.8598	0.361392	-1.46836	1.96795e-05	0.000830554	ITGA8	integrin, alpha 8 [Source:HGNC Symbol;Acc:6144]
ENSCPOG00000006926	20.6552	31.7419	9.56847	0.301446	-1.73003	2.07378e-05	0.00087167
ENSCPOG00000015175	58.6134	27.9963	89.2305	3.18723	1.6723	2.07578e-05	0.00087167
ENSCPOG00000015347	661.354	490.817	831.89	1.69491	0.761207	2.12418e-05	0.000889764	ALDH9A1	aldehyde dehydrogenase 9 family, member A1 [Source:HGNC Symbol;Acc:412]
ENSCPOG00000024011	420.165	307.451	532.879	1.73322	0.793451	2.14597e-05	0.000894894	HOPX	HOP homeobox [Source:HGNC Symbol;Acc:24961]
ENSCPOG00000022228	57.2947	31.2421	83.3472	2.66778	1.41564	2.14944e-05	0.000894894	TINAGL1	tubulointerstitial nephritis antigen-like 1 [Source:HGNC Symbol;Acc:19168]
ENSCPOG00000011051	9.74718	15.8125	3.68182	0.232842	-2.10258	2.15245e-05	0.000894894	CETP	cholesteryl ester transfer protein, plasma [Source:HGNC Symbol;Acc:1869]
ENSCPOG00000008599	788.322	593.874	982.769	1.65484	0.726696	2.18141e-05	0.000904689	UBAC2	UBA domain containing 2 [Source:HGNC Symbol;Acc:20486]
ENSCPOG00000006694	24.0175	36.1677	11.8674	0.328123	-1.60769	2.27836e-05	0.000942567	KIRREL2	kin of IRRE like 2 (Drosophila) [Source:HGNC Symbol;Acc:18816]
ENSCPOG00000006479	827.867	1042.11	613.628	0.588835	-0.764065	2.30619e-05	0.000951729	DKK3	dickkopf 3 homolog (Xenopus laevis) [Source:HGNC Symbol;Acc:2893]
ENSCPOG00000011425	163.672	219.048	108.296	0.494395	-1.01627	2.31591e-05	0.000953391	CSGALNACT2	chondroitin sulfate N-acetylgalactosaminyltransferase 2 [Source:HGNC Symbol;Acc:24292]
ENSCPOG00000003759	5.6656	0.781684	10.5495	13.4959	3.75445	2.42112e-05	0.00099426	UPK1B	uroplakin 1B [Source:HGNC Symbol;Acc:12578]
ENSCPOG00000018407	25.1166	11.9713	38.262	3.19614	1.67633	2.43609e-05	0.000997965	SNORD91	Small nucleolar RNA SNORD91 family [Source:RFAM;Acc:RF00580]
ENSCPOG00000003488	199.143	264.632	133.654	0.505055	-0.985488	2.4699e-05	0.00100935	SH3BGR	SH3 domain binding glutamic acid-rich protein [Source:HGNC Symbol;Acc:10822]
ENSCPOG00000012420	413.68	526.058	301.302	0.572753	-0.804014	2.48341e-05	0.0010124
ENSCPOG00000011378	175.423	118.461	232.384	1.96169	0.972097	2.57264e-05	0.00104623	FAM188B	family with sequence similarity 188, member B [Source:HGNC Symbol;Acc:21916]
ENSCPOG00000017422	4392.97	2698.73	6087.2	2.25558	1.1735	2.66863e-05	0.00108264	ND3	NADH dehydrogenase subunit 3 [Source:RefSeq peptide;Acc:NP_008758]
ENSCPOG00000000951	443.718	309.745	577.69	1.86505	0.899214	2.67741e-05	0.00108357	LZTS2	leucine zipper, putative tumor suppressor 2 [Source:HGNC Symbol;Acc:29381]
ENSCPOG00000025647	801.055	973.924	628.185	0.645004	-0.632619	2.73257e-05	0.00110323	MPP3	membrane protein, palmitoylated 3 (MAGUK p55 subfamily member 3) [Source:HGNC Symbol;Acc:7221]
ENSCPOG00000013744	269.275	196.446	342.104	1.74147	0.800305	2.74504e-05	0.00110561	SLC6A13	solute carrier family 6 (neurotransmitter transporter, GABA), member 13 [Source:HGNC Symbol;Acc:11046]
ENSCPOG00000026753	14.8231	3.62044	26.0257	7.18857	2.8457	2.79026e-05	0.00112112	B3GNT3	UDP-GlcNAc:betaGal beta-1,3-N-acetylglucosaminyltransferase 3 [Source:HGNC Symbol;Acc:13528]
ENSCPOG00000005510	9.99482	16.2209	3.76872	0.232337	-2.10571	2.90933e-05	0.00116617	C7FFS2_CAVPO	transient receptor potential cation channel subfamily M member 8 [Source:RefSeq peptide;Acc:NP_001166561]
ENSCPOG00000022263	43.0878	22.8016	63.3741	2.77936	1.47475	2.92249e-05	0.00116865
ENSCPOG00000012258	44.7972	62.8218	26.7725	0.426166	-1.23051	2.95699e-05	0.00117963	XRCC4	X-ray repair complementing defective repair in Chinese hamster cells 4 [Source:HGNC Symbol;Acc:12831]
ENSCPOG00000014830	455.419	586.808	324.031	0.552193	-0.856755	2.99581e-05	0.00119228	SRR	serine racemase [Source:HGNC Symbol;Acc:14398]
ENSCPOG00000013881	7.4123	2.12716	12.6975	5.96922	2.57754	3.03975e-05	0.0012069	EGFL6	EGF-like-domain, multiple 6 [Source:HGNC Symbol;Acc:3235]
ENSCPOG00000025135	240.484	313.39	167.577	0.534722	-0.903138	3.05113e-05	0.00120855
ENSCPOG00000001647	43.5073	63.6745	23.34	0.366551	-1.44791	3.08431e-05	0.00121881	LIPM	lipase, family member M [Source:HGNC Symbol;Acc:23455]
ENSCPOG00000021857	284.119	400.314	167.924	0.419482	-1.25332	3.19852e-05	0.00126097
ENSCPOG00000008855	463.16	278.44	647.88	2.32682	1.21836	3.2233e-05	0.00126775	PRKCDBP	protein kinase C, delta binding protein [Source:HGNC Symbol;Acc:9400]
ENSCPOG00000022420	58.7472	35.5466	81.9477	2.30536	1.20499	3.26041e-05	0.00127935	S100P	S100 calcium binding protein P [Source:HGNC Symbol;Acc:10504]
ENSCPOG00000002929	794.846	1002.2	587.496	0.586209	-0.770514	3.27175e-05	0.0012808	B2MG_CAVPO	Beta-2-microglobulin [Source:UniProtKB/Swiss-Prot;Acc:P01886]
ENSCPOG00000004739	18.8906	29.1462	8.63497	0.296264	-1.75505	3.33929e-05	0.00130419	MATN3	matrilin 3 [Source:HGNC Symbol;Acc:6909]
ENSCPOG00000005944	89.9948	121.653	58.3362	0.479528	-1.06031	3.35349e-05	0.00130669	DOCK11	dedicator of cytokinesis 11 [Source:HGNC Symbol;Acc:23483]
ENSCPOG00000008879	370.28	475.204	265.357	0.558407	-0.840612	3.3663e-05	0.00130864	HIBCH	3-hydroxyisobutyryl-CoA hydrolase [Source:HGNC Symbol;Acc:4908]
ENSCPOG00000007021	8.25166	14.1645	2.33885	0.165121	-2.59841	3.4993e-05	0.00135719
ENSCPOG00000021758	127.641	164.172	91.1104	0.55497	-0.849518	3.55529e-05	0.00137573
ENSCPOG00000021534	491.817	358.087	625.547	1.74691	0.804809	3.61023e-05	0.00139377	PRODH	proline dehydrogenase (oxidase) 1 [Source:HGNC Symbol;Acc:9453]
ENSCPOG00000009816	3911.86	4946.31	2877.41	0.581728	-0.781584	3.65465e-05	0.00140767	DDX1	DEAD (Asp-Glu-Ala-Asp) box helicase 1 [Source:HGNC Symbol;Acc:2734]
ENSCPOG00000007681	96.4596	126.592	66.3275	0.523949	-0.932502	3.72494e-05	0.00142658	NLRP3	NLR family, pyrin domain containing 3 [Source:HGNC Symbol;Acc:16400]
ENSCPOG00000001182	7.79792	13.2608	2.33509	0.176091	-2.50561	3.72622e-05	0.00142658	ANKRD5	ankyrin repeat domain 5 [Source:HGNC Symbol;Acc:15803]
ENSCPOG00000008375	12.477	20.8418	4.11222	0.197306	-2.34149	3.72929e-05	0.00142658	C2orf40	chromosome 2 open reading frame 40 [Source:HGNC Symbol;Acc:24642]
ENSCPOG00000017430	4599.03	6527.49	2670.57	0.409126	-1.28938	3.7705e-05	0.00143906	ND6	NADH dehydrogenase subunit 6 [Source:RefSeq peptide;Acc:NP_008762]
ENSCPOG00000006630	46.686	28.141	65.2311	2.31801	1.21289	3.82482e-05	0.00145449	FAM210B	family with sequence similarity 210, member B [Source:HGNC Symbol;Acc:16102]
ENSCPOG00000009935	9.13395	15.4093	2.8586	0.185511	-2.43042	3.82829e-05	0.00145449
ENSCPOG00000012831	282.486	353.668	211.304	0.597464	-0.743077	3.85876e-05	0.00146275	FRAS1	Fraser syndrome 1 [Source:HGNC Symbol;Acc:19185]
ENSCPOG00000010775	262.756	339.164	186.347	0.549431	-0.863991	3.97102e-05	0.00150191	LNX1	ligand of numb-protein X 1, E3 ubiquitin protein ligase [Source:HGNC Symbol;Acc:6657]
ENSCPOG00000007471	70.1026	35.826	104.379	2.91351	1.54276	4.16773e-05	0.00157276	GLYCTK	glycerate kinase [Source:HGNC Symbol;Acc:24247]
ENSCPOG00000015050	193.986	246.171	141.8	0.576023	-0.795802	4.17846e-05	0.00157326	C2orf80	chromosome 2 open reading frame 80 [Source:HGNC Symbol;Acc:34352]
ENSCPOG00000012100	80.8124	114.585	47.0394	0.410518	-1.28448	4.23942e-05	0.00159263	CDH1	cadherin 1, type 1, E-cadherin (epithelial) [Source:HGNC Symbol;Acc:1748]
ENSCPOG00000026889	2.72647	5.23803	0.214909	0.0410285	-4.60723	4.27646e-05	0.00160296
ENSCPOG00000000102	1610.26	2099.77	1120.74	0.533745	-0.905778	4.28666e-05	0.00160319
ENSCPOG00000011266	60.012	84.5826	35.4415	0.419016	-1.25492	4.34637e-05	0.0016219	RRAGB	Ras-related GTP binding B [Source:HGNC Symbol;Acc:19901]
ENSCPOG00000008885	699.755	508.547	890.964	1.75198	0.808986	4.44962e-05	0.00165604	RNH1	ribonuclease/angiogenin inhibitor 1 [Source:HGNC Symbol;Acc:10074]
ENSCPOG00000025000	58.8443	80.6369	37.0517	0.459488	-1.1219	4.46899e-05	0.00165604
ENSCPOG00000007507	264.989	198.231	331.747	1.67353	0.742896	4.47174e-05	0.00165604	NR2C1	nuclear receptor subfamily 2, group C, member 1 [Source:HGNC Symbol;Acc:7971]
ENSCPOG00000008405	47.4306	24.6417	70.2195	2.84962	1.51077	4.47738e-05	0.00165604
ENSCPOG00000004369	56.5093	78.949	34.0695	0.431539	-1.21244	4.53901e-05	0.00167514	ADAP2	ArfGAP with dual PH domains 2 [Source:HGNC Symbol;Acc:16487]
ENSCPOG00000002674	56.9009	80.712	33.0897	0.409972	-1.2864	4.56371e-05	0.00168055	AGA	aspartylglucosaminidase [Source:HGNC Symbol;Acc:318]
ENSCPOG00000026404	41.9198	61.2442	22.5954	0.368939	-1.43855	4.58267e-05	0.00168383	C6orf162	chromosome 6 open reading frame 162 [Source:HGNC Symbol;Acc:21401]
ENSCPOG00000003753	87.711	21.7392	153.683	7.06937	2.82158	4.62669e-05	0.00169464	NUPR1	nuclear protein, transcriptional regulator, 1 [Source:HGNC Symbol;Acc:29990]
ENSCPOG00000013286	151.479	196.131	106.828	0.544674	-0.876536	4.63231e-05	0.00169464	LAMA1	laminin, alpha 1 [Source:HGNC Symbol;Acc:6481]
ENSCPOG00000026754	186.002	256.166	115.837	0.452197	-1.14498	4.71535e-05	0.00172126
ENSCPOG00000001374	233.128	169.074	297.183	1.75771	0.813696	4.75277e-05	0.0017309	FAM175A	family with sequence similarity 175, member A [Source:HGNC Symbol;Acc:25829]
ENSCPOG00000015613	29.2389	42.8443	15.6336	0.364893	-1.45445	4.77736e-05	0.0017309	C2orf77	chromosome 2 open reading frame 77 [Source:HGNC Symbol;Acc:25064]
ENSCPOG00000014630	17.4804	28.1967	6.76404	0.239887	-2.05957	4.77816e-05	0.0017309	SH2D3A	SH2 domain containing 3A [Source:HGNC Symbol;Acc:16885]
ENSCPOG00000025378	47.3494	65.0927	29.6062	0.454831	-1.1366	4.7831e-05	0.0017309	FBXO36	F-box protein 36 [Source:HGNC Symbol;Acc:27020]
ENSCPOG00000001975	13.6746	22.6393	4.70981	0.208037	-2.26509	4.83587e-05	0.0017445	IL1B_CAVPO	Interleukin-1 beta [Source:UniProtKB/Swiss-Prot;Acc:Q9WVG1]
ENSCPOG00000000504	56.7976	79.3424	34.2528	0.431709	-1.21187	4.8415e-05	0.0017445
ENSCPOG00000029565	3.67066	6.8839	0.457422	0.0664482	-3.91163	5.04407e-05	0.00181359	SNORA2	Small nucleolar RNA SNORA2/SNORA34 family [Source:RFAM;Acc:RF00410]
ENSCPOG00000007124	48.0988	67.9823	28.2153	0.415038	-1.26868	5.06105e-05	0.0018158	POLG2	polymerase (DNA directed), gamma 2, accessory subunit [Source:HGNC Symbol;Acc:9180]
ENSCPOG00000010132	52.7525	83.6284	21.8765	0.261592	-1.93461	5.25299e-05	0.0018775	VWA3B	von Willebrand factor A domain containing 3B [Source:HGNC Symbol;Acc:28385]
ENSCPOG00000005201	13.2153	20.8882	5.54227	0.265329	-1.91414	5.25544e-05	0.0018775	TSPAN1	tetraspanin 1 [Source:HGNC Symbol;Acc:20657]
ENSCPOG00000024876	6.80654	1.747	11.8661	6.79226	2.76389	5.28923e-05	0.00188556	MC3R	melanocortin 3 receptor [Source:HGNC Symbol;Acc:6931]
ENSCPOG00000025067	650.921	380.283	921.56	2.42335	1.277	5.42678e-05	0.00192397	CPNE7	copine VII [Source:HGNC Symbol;Acc:2320]
ENSCPOG00000004636	807.569	1019.17	595.966	0.584755	-0.774095	5.44522e-05	0.00192397	VWA5A	von Willebrand factor A domain containing 5A [Source:HGNC Symbol;Acc:6658]
ENSCPOG00000017414	4347.78	751.858	7943.69	10.5654	3.40128	5.44703e-05	0.00192397
ENSCPOG00000024721	32.698	51.2173	14.1787	0.276835	-1.8529	5.45064e-05	0.00192397
ENSCPOG00000020485	152.236	217.684	86.7884	0.39869	-1.32666	5.4544e-05	0.00192397
ENSCPOG00000011693	242.132	308.081	176.182	0.57187	-0.806242	5.48734e-05	0.00192848	LYN	v-yes-1 Yamaguchi sarcoma viral related oncogene homolog [Source:HGNC Symbol;Acc:6735]
ENSCPOG00000004710	479.418	288.94	669.897	2.31847	1.21317	5.49022e-05	0.00192848	C9orf114	chromosome 9 open reading frame 114 [Source:HGNC Symbol;Acc:26933]
ENSCPOG00000002796	38.0636	56.2588	19.8684	0.353161	-1.5016	5.55071e-05	0.00194565
ENSCPOG00000008136	311.126	229.618	392.635	1.70995	0.773951	5.56427e-05	0.00194633	BLVRA	biliverdin reductase A [Source:HGNC Symbol;Acc:1062]
ENSCPOG00000007966	51.4315	26.5432	76.3197	2.8753	1.52371	5.62389e-05	0.00196309
ENSCPOG00000001419	292.875	209.379	376.371	1.79755	0.846035	5.72536e-05	0.00199411	ZNF839	zinc finger protein 839 [Source:HGNC Symbol;Acc:20345]
ENSCPOG00000005000	370.8	510.113	231.487	0.453796	-1.13988	5.73655e-05	0.00199411	SLCO1C1	solute carrier organic anion transporter family, member 1C1 [Source:HGNC Symbol;Acc:13819]
ENSCPOG00000006105	125.78	79.1156	172.445	2.17965	1.1241	5.76427e-05	0.00199959	BEST1	bestrophin 1 [Source:HGNC Symbol;Acc:12703]
ENSCPOG00000026870	17.782	2.14321	33.4207	15.5938	3.9629	5.87337e-05	0.00203078
ENSCPOG00000005619	5.6984	9.94137	1.45543	0.146401	-2.772	5.87842e-05	0.00203078	SOAT2	sterol O-acyltransferase 2 [Source:HGNC Symbol;Acc:11178]
ENSCPOG00000009203	111.09	146.328	75.8522	0.518373	-0.947939	6.03072e-05	0.00207911
ENSCPOG00000022527	22.1855	11.413	32.958	2.88775	1.52995	6.21809e-05	0.00213784
ENSCPOG00000027120	69.4251	104.308	34.542	0.331154	-1.59443	6.22658e-05	0.00213784	HDC	histidine decarboxylase [Source:HGNC Symbol;Acc:4855]
ENSCPOG00000011275	18.3662	27.4411	9.29128	0.338589	-1.56239	6.26674e-05	0.00214722
ENSCPOG00000009943	10.7241	3.70858	17.7397	4.78342	2.25804	6.44335e-05	0.00220323	VWCE	von Willebrand factor C and EGF domains [Source:HGNC Symbol;Acc:26487]
ENSCPOG00000010039	639.785	819.175	460.395	0.562023	-0.831298	6.50287e-05	0.00221905	ROBO1	roundabout, axon guidance receptor, homolog 1 (Drosophila) [Source:HGNC Symbol;Acc:10249]
ENSCPOG00000005375	5.33856	9.56463	1.11248	0.116312	-3.10393	6.58416e-05	0.00224223	DSG1	desmoglein 1 [Source:HGNC Symbol;Acc:3048]
ENSCPOG00000010240	37.9209	16.0257	59.8161	3.73252	1.90015	6.695e-05	0.00227535
ENSCPOG00000013098	242.275	167.142	317.407	1.89902	0.925256	6.72539e-05	0.00227729	APOPT1	apoptogenic 1 [Source:HGNC Symbol;Acc:20492]
ENSCPOG00000020951	24.0858	35.013	13.1586	0.37582	-1.41189	6.72788e-05	0.00227729	CLDN7	claudin 7 [Source:HGNC Symbol;Acc:2049]
ENSCPOG00000021193	36.8887	21.9439	51.8336	2.3621	1.24007	6.8613e-05	0.00231776
ENSCPOG00000014664	64.446	40.7286	88.1634	2.16466	1.11414	6.92267e-05	0.00233379	MYO1H	myosin IH [Source:HGNC Symbol;Acc:13879]
ENSCPOG00000006041	73.0754	47.2073	98.9435	2.09594	1.0676	7.0092e-05	0.00235822	TTC38	tetratricopeptide repeat domain 38 [Source:HGNC Symbol;Acc:26082]
ENSCPOG00000022833	1.87027	3.74054	0	0	#NAME?	7.07063e-05	0.00237412	SNORA2	Small nucleolar RNA SNORA2/SNORA34 family [Source:RFAM;Acc:RF00410]
ENSCPOG00000026682	43.4284	23.0631	63.7937	2.76605	1.46783	7.18794e-05	0.00240868	F2	coagulation factor II (thrombin) [Source:HGNC Symbol;Acc:3535]
ENSCPOG00000002402	28.2634	14.177	42.3499	2.98723	1.57881	7.42301e-05	0.00247643	MYOM2	myomesin (M-protein) 2, 165kDa [Source:HGNC Symbol;Acc:7614]
ENSCPOG00000015356	41.2163	56.9579	25.4747	0.447256	-1.16083	7.43301e-05	0.00247643	SPTBN5	spectrin, beta, non-erythrocytic 5 [Source:HGNC Symbol;Acc:15680]
ENSCPOG00000005056	143.65	96.9872	190.313	1.96225	0.972511	7.43447e-05	0.00247643
ENSCPOG00000026144	185.903	96.9159	274.89	2.83638	1.50405	7.5013e-05	0.00249374	BOK	BCL2-related ovarian killer [Source:HGNC Symbol;Acc:1087]
ENSCPOG00000004690	10.7458	3.98184	17.5098	4.39743	2.13666	7.53459e-05	0.00249984
ENSCPOG00000004527	330.376	422.824	237.928	0.562713	-0.829529	7.60654e-05	0.00251873	ARSB	arylsulfatase B [Source:HGNC Symbol;Acc:714]
ENSCPOG00000014875	407.513	504.897	310.128	0.614241	-0.703123	8.0577e-05	0.00266285	ULK4	unc-51-like kinase 4 (C. elegans) [Source:HGNC Symbol;Acc:15784]
ENSCPOG00000005608	71.7378	45.5408	97.9348	2.15049	1.10466	8.10586e-05	0.0026735	MDH1B	malate dehydrogenase 1B, NAD (soluble) [Source:HGNC Symbol;Acc:17836]
ENSCPOG00000012622	440.216	541.532	338.901	0.625818	-0.676184	8.13496e-05	0.00267782	RAB3IL1	RAB3A interacting protein (rabin3)-like 1 [Source:HGNC Symbol;Acc:9780]
ENSCPOG00000005916	55.7755	35.1829	76.368	2.1706	1.11809	8.51504e-05	0.00279744	ERN2	endoplasmic reticulum to nucleus signaling 2 [Source:HGNC Symbol;Acc:16942]
ENSCPOG00000001094	232.84	302.891	162.789	0.537451	-0.895795	8.66663e-05	0.00284167	NT5E	5'-nucleotidase, ecto (CD73) [Source:HGNC Symbol;Acc:8021]
ENSCPOG00000020193	492.937	620.896	364.977	0.587824	-0.766545	8.68859e-05	0.00284331	SARM1	sterile alpha and TIR motif containing 1 [Source:HGNC Symbol;Acc:17074]
ENSCPOG00000023566	4.88752	0.914579	8.86046	9.68801	3.2762	8.71057e-05	0.00284494	UMODL1	uromodulin-like 1 [Source:HGNC Symbol;Acc:12560]
ENSCPOG00000017938	16.5473	7.14958	25.9451	3.6289	1.85953	8.78578e-05	0.00285931	SNORA40	Small nucleolar RNA SNORA40 [Source:RFAM;Acc:RF00561]
ENSCPOG00000010809	779.822	496.212	1063.43	2.1431	1.0997	8.7887e-05	0.00285931	MAN2C1	mannosidase, alpha, class 2C, member 1 [Source:HGNC Symbol;Acc:6827]
ENSCPOG00000007432	95.5851	55.9123	135.258	2.41911	1.27447	8.82129e-05	0.00286435	SEC31B	SEC31 homolog B (S. cerevisiae) [Source:HGNC Symbol;Acc:23197]
ENSCPOG00000001272	576.765	400.747	752.784	1.87845	0.909545	8.92429e-05	0.0028922	DDRGK1	DDRGK domain containing 1 [Source:HGNC Symbol;Acc:16110]
ENSCPOG00000005168	3.41959	6.29771	0.541463	0.0859778	-3.53989	9.01598e-05	0.00291627	GALNTL5	UDP-N-acetyl-alpha-D-galactosamine:polypeptide N-acetylgalactosaminyltransferase-like 5 [Source:HGNC Symbol;Acc:21725]
ENSCPOG00000008836	73.4496	95.4978	51.4013	0.538246	-0.893662	9.05223e-05	0.00292235	TEC	tec protein tyrosine kinase [Source:HGNC Symbol;Acc:11719]
ENSCPOG00000014443	56.8039	33.4783	80.1295	2.39348	1.25911	9.10582e-05	0.002934	FHDC1	FH2 domain containing 1 [Source:HGNC Symbol;Acc:29363]
ENSCPOG00000024557	279.164	159.852	398.475	2.49278	1.31775	9.13804e-05	0.00293873
ENSCPOG00000014463	59.2994	92.4686	26.1301	0.282584	-1.82325	9.20854e-05	0.00295573
ENSCPOG00000015368	80.4939	54.3519	106.636	1.96195	0.972288	9.24879e-05	0.00295827	AGXT2L1	alanine-glyoxylate aminotransferase 2-like 1 [Source:HGNC Symbol;Acc:14404]
ENSCPOG00000009167	149.877	192.143	107.611	0.560057	-0.836354	9.25874e-05	0.00295827	DEM1	defects in morphology 1 homolog (S. cerevisiae) [Source:HGNC Symbol;Acc:26115]
ENSCPOG00000015148	10.3561	16.751	3.96117	0.236473	-2.08025	9.28535e-05	0.00295827	TRPV3	transient receptor potential cation channel, subfamily V, member 3 [Source:HGNC Symbol;Acc:18084]
ENSCPOG00000014674	5.71735	9.96159	1.47312	0.14788	-2.7575	9.29791e-05	0.00295827
ENSCPOG00000006157	1120.71	824.509	1416.92	1.7185	0.781146	9.31816e-05	0.00295827	PKIG	protein kinase (cAMP-dependent, catalytic) inhibitor gamma [Source:HGNC Symbol;Acc:9019]
ENSCPOG00000027496	2.95754	5.67731	0.237779	0.0418823	-4.57751	9.32238e-05	0.00295827
ENSCPOG00000024986	19.2785	1.98721	36.5697	18.4025	4.20183	9.40175e-05	0.00297781	GP9	glycoprotein IX (platelet) [Source:HGNC Symbol;Acc:4444]
ENSCPOG00000013428	70.4794	94.145	46.8139	0.497253	-1.00795	9.48875e-05	0.0029997	ATG10	ATG10 autophagy related 10 homolog (S. cerevisiae) [Source:HGNC Symbol;Acc:20315]
ENSCPOG00000020548	459.369	343.164	575.574	1.67726	0.746105	9.5229e-05	0.00300349	SYNPO2	synaptopodin 2 [Source:HGNC Symbol;Acc:17732]
ENSCPOG00000029019	22.4242	32.6679	12.1805	0.37286	-1.42329	9.53659e-05	0.00300349	7SK	7SK RNA [Source:RFAM;Acc:RF00100]
ENSCPOG00000013336	43.4808	24.8912	62.0705	2.49367	1.31827	9.61369e-05	0.00302209	PIEZO2	piezo-type mechanosensitive ion channel component 2 [Source:HGNC Symbol;Acc:26270]
ENSCPOG00000013007	346.694	439.73	253.657	0.576848	-0.793737	9.63233e-05	0.00302228	HPS3	Hermansky-Pudlak syndrome 3 [Source:HGNC Symbol;Acc:15597]
ENSCPOG00000012418	42.3328	60.5059	24.1596	0.399294	-1.32448	9.76966e-05	0.00305964	GALNT12	UDP-N-acetyl-alpha-D-galactosamine:polypeptide N-acetylgalactosaminyltransferase 12 (GalNAc-T12) [Source:HGNC Symbol;Acc:19877]
ENSCPOG00000015518	45.6174	64.9809	26.254	0.404026	-1.30748	9.90133e-05	0.00309509	ITGAX	integrin, alpha X (complement component 3 receptor 4 subunit) [Source:HGNC Symbol;Acc:6152]
ENSCPOG00000021598	13.885	21.5172	6.25268	0.290589	-1.78295	0.000100532	0.00313672	RASSF9	Ras association (RalGDS/AF-6) domain family (N-terminal) member 9 [Source:HGNC Symbol;Acc:15739]
ENSCPOG00000001495	148.779	106.86	190.698	1.78457	0.835576	0.000101085	0.00314809	RDM1	RAD52 motif 1 [Source:HGNC Symbol;Acc:19950]
ENSCPOG00000000726	39.3644	60.9725	17.7563	0.291218	-1.77983	0.000102585	0.00318888	FBN2	fibrillin 2 [Source:HGNC Symbol;Acc:3604]
ENSCPOG00000020202	27.4158	14.2359	40.5957	2.85165	1.5118	0.000103081	0.00319838	IZUMO4	IZUMO family member 4 [Source:HGNC Symbol;Acc:26950]
ENSCPOG00000002063	334.189	424.363	244.015	0.575015	-0.798328	0.000104015	0.00321818	IFNAR2	interferon (alpha, beta and omega) receptor 2 [Source:HGNC Symbol;Acc:5433]
ENSCPOG00000008255	1.71743	3.43487	0	0	#NAME?	0.000104104	0.00321818
ENSCPOG00000029494	1.8653	3.7306	0	0	#NAME?	0.000104567	0.00322656	SNORA2	Small nucleolar RNA SNORA2/SNORA34 family [Source:RFAM;Acc:RF00410]
ENSCPOG00000023463	74.8748	100.193	49.5562	0.494605	-1.01565	0.000106687	0.00328592	SNCG	synuclein, gamma (breast cancer-specific protein 1) [Source:HGNC Symbol;Acc:11141]
ENSCPOG00000002546	507.288	336.8	677.776	2.0124	1.00892	0.00010845	0.0033341	RNF25	ring finger protein 25 [Source:HGNC Symbol;Acc:14662]
ENSCPOG00000002759	185.589	81.1683	290.01	3.57295	1.83712	0.000111816	0.00343128	C14orf2	chromosome 14 open reading frame 2 [Source:HGNC Symbol;Acc:1188]
ENSCPOG00000027502	495.571	617.971	373.17	0.603863	-0.727707	0.000116452	0.00356702	TBC1D8	TBC1 domain family, member 8 (with GRAM domain) [Source:HGNC Symbol;Acc:17791]
ENSCPOG00000014151	209.411	148.923	269.899	1.81234	0.857852	0.000117198	0.00357935	EBP_CAVPO	3-beta-hydroxysteroid-Delta(8),Delta(7)-isomerase [Source:UniProtKB/Swiss-Prot;Acc:Q60490]
ENSCPOG00000012968	8.5579	13.9587	3.1571	0.226175	-2.14449	0.000117282	0.00357935	CCDC154	coiled-coil domain containing 154 [Source:HGNC Symbol;Acc:34454]
ENSCPOG00000008761	354.632	249.445	459.82	1.84337	0.882348	0.000118212	0.00360118	MRPS23	mitochondrial ribosomal protein S23 [Source:HGNC Symbol;Acc:14509]
ENSCPOG00000005575	104.995	139.876	70.1152	0.501268	-0.996347	0.00011867	0.00360857	MMRN1	multimerin 1 [Source:HGNC Symbol;Acc:7178]
ENSCPOG00000021950	46.7142	66.9665	26.4619	0.395152	-1.33952	0.000120402	0.00365003	SFT2D2	SFT2 domain containing 2 [Source:HGNC Symbol;Acc:25140]
ENSCPOG00000012317	61.6141	82.5828	40.6455	0.492179	-1.02275	0.00012047	0.00365003	AP5S1	adaptor-related protein complex 5, sigma 1 subunit [Source:HGNC Symbol;Acc:15875]
ENSCPOG00000025157	95.545	67.0303	124.06	1.8508	0.888149	0.000122541	0.00370222
ENSCPOG00000020699	13.3322	20.632	6.03238	0.29238	-1.77408	0.000122634	0.00370222	PNMT	phenylethanolamine N-methyltransferase [Source:HGNC Symbol;Acc:9160]
ENSCPOG00000015567	224.844	166.222	283.466	1.70534	0.770063	0.000125807	0.00379118	DFNA5	deafness, autosomal dominant 5 [Source:HGNC Symbol;Acc:2810]
ENSCPOG00000015393	28.5146	14.6666	42.3625	2.88836	1.53025	0.000127917	0.00384785	LRIT1	leucine-rich repeat, immunoglobulin-like and transmembrane domains 1 [Source:HGNC Symbol;Acc:23404]
ENSCPOG00000009695	354.749	452.911	256.588	0.566531	-0.819774	0.000130324	0.00390775	CCBL2	cysteine conjugate-beta lyase 2 [Source:HGNC Symbol;Acc:33238]
ENSCPOG00000000907	148.363	102.527	194.199	1.89412	0.921527	0.000130375	0.00390775	SERGEF	secretion regulating guanine nucleotide exchange factor [Source:HGNC Symbol;Acc:17499]
ENSCPOG00000008588	1216.5	502.819	1930.18	3.83872	1.94063	0.000131177	0.00392477	CDK20	cyclin-dependent kinase 20 [Source:HGNC Symbol;Acc:21420]
ENSCPOG00000003519	40.6183	10.588	70.6485	6.6725	2.73823	0.000131575	0.00392965	UPK1A	uroplakin 1A [Source:HGNC Symbol;Acc:12577]
ENSCPOG00000014512	185.635	236.201	135.069	0.571838	-0.806321	0.000134848	0.00401321
ENSCPOG00000012242	159.68	204.202	115.157	0.563936	-0.826396	0.000134851	0.00401321	MTFMT	mitochondrial methionyl-tRNA formyltransferase [Source:HGNC Symbol;Acc:29666]
ENSCPOG00000006217	139.838	98.6313	181.044	1.83557	0.876226	0.000135177	0.00401577	PTCD2	pentatricopeptide repeat domain 2 [Source:HGNC Symbol;Acc:25734]
ENSCPOG00000001033	3.46134	6.47779	0.444887	0.0686788	-3.86399	0.000137279	0.00406665	HRASLS5	HRAS-like suppressor family, member 5 [Source:HGNC Symbol;Acc:24978]
ENSCPOG00000014702	30.518	44.4117	16.6243	0.374322	-1.41765	0.000137375	0.00406665	IL1R1	interleukin 1 receptor, type I [Source:HGNC Symbol;Acc:5993]
ENSCPOG00000013185	45.7552	61.7401	29.7703	0.482187	-1.05233	0.000139539	0.00412342	CLEC4G	C-type lectin domain family 4, member G [Source:HGNC Symbol;Acc:24591]
ENSCPOG00000009706	107.715	145.953	69.478	0.47603	-1.07088	0.000140366	0.00414055	SLCO1A2	solute carrier organic anion transporter family, member 1A2 [Source:HGNC Symbol;Acc:10956]
ENSCPOG00000025275	4.03938	7.53521	0.543552	0.072135	-3.79316	0.000141279	0.00416017
ENSCPOG00000010596	4.77254	8.39618	1.1489	0.136837	-2.86947	0.000145145	0.00426651	SC6A4_CAVPO	Sodium-dependent serotonin transporter [Source:UniProtKB/Swiss-Prot;Acc:O35899]
ENSCPOG00000003852	4.27873	0.907628	7.64982	8.42837	3.07525	0.000145899	0.00428114	ADCY10	adenylate cyclase 10 (soluble) [Source:HGNC Symbol;Acc:21285]
ENSCPOG00000000007	264.117	193.761	334.473	1.72622	0.787614	0.000146352	0.00428695	D2HGDH	D-2-hydroxyglutarate dehydrogenase [Source:HGNC Symbol;Acc:28358]
ENSCPOG00000024119	68.3919	89.8228	46.9611	0.52282	-0.935615	0.000149923	0.00438387	CAPN8	calpain 8 [Source:HGNC Symbol;Acc:1485]
ENSCPOG00000007582	530.563	274.822	786.304	2.86114	1.51659	0.000150924	0.00440544	PHYH	phytanoyl-CoA 2-hydroxylase [Source:HGNC Symbol;Acc:8940]
ENSCPOG00000013189	15.1941	6.14554	24.2427	3.94476	1.97994	0.000152898	0.00445532	KIAA1257	KIAA1257 [Source:HGNC Symbol;Acc:29231]
ENSCPOG00000010615	398.25	293.817	502.683	1.71087	0.774728	0.000153832	0.00447292	KPTN	kaptin (actin binding protein) [Source:HGNC Symbol;Acc:6404]
ENSCPOG00000022287	66.0266	41.8844	90.1689	2.1528	1.10622	0.000154036	0.00447292
ENSCPOG00000006034	322.101	396.134	248.068	0.626224	-0.67525	0.000155717	0.00450779	C7orf50	chromosome 7 open reading frame 50 [Source:HGNC Symbol;Acc:22421]
ENSCPOG00000006665	34.5149	49.2968	19.7329	0.400289	-1.32089	0.000155775	0.00450779	PGAM2	phosphoglycerate mutase 2 (muscle) [Source:HGNC Symbol;Acc:8889]
ENSCPOG00000024246	203.275	257.632	148.919	0.57803	-0.790785	0.000156299	0.00451515
ENSCPOG00000010959	171.52	102.444	240.595	2.34856	1.23178	0.000158875	0.00458168	KHK	ketohexokinase (fructokinase) [Source:HGNC Symbol;Acc:6315]
ENSCPOG00000019999	55.5722	35.4274	75.7171	2.13725	1.09576	0.00015998	0.00460562	MRGPRF	MAS-related GPR, member F [Source:HGNC Symbol;Acc:24828]
ENSCPOG00000014833	512.78	389.222	636.338	1.6349	0.709201	0.000160606	0.00461569	TSR1	TSR1, 20S rRNA accumulation, homolog (S. cerevisiae) [Source:HGNC Symbol;Acc:25542]
ENSCPOG00000003645	31.0645	42.7876	19.3414	0.452033	-1.1455	0.000161727	0.00463997	MYO15A	myosin XVA [Source:HGNC Symbol;Acc:7594]
ENSCPOG00000005170	219.516	162.092	276.94	1.70854	0.772766	0.0001651	0.00472863	SLC25A19	solute carrier family 25 (mitochondrial thiamine pyrophosphate carrier), member 19 [Source:HGNC Symbol;Acc:14409]
ENSCPOG00000025176	270.196	360.367	180.025	0.499559	-1.00127	0.000167573	0.00479129	CA8	carbonic anhydrase VIII [Source:HGNC Symbol;Acc:1382]
ENSCPOG00000012966	319.379	426.316	212.441	0.498319	-1.00486	0.000170261	0.00485983	OXCT1	3-oxoacid CoA transferase 1 [Source:HGNC Symbol;Acc:8527]
ENSCPOG00000011519	10.6158	1.70655	19.5251	11.4413	3.51617	0.000171024	0.00487331	TRPA1	transient receptor potential cation channel, subfamily A, member 1 [Source:HGNC Symbol;Acc:497]
ENSCPOG00000006057	21.4112	11.2414	31.5811	2.80936	1.49024	0.000171495	0.00487843	NMNAT3	nicotinamide nucleotide adenylyltransferase 3 [Source:HGNC Symbol;Acc:20989]
ENSCPOG00000004454	592.57	731.996	453.145	0.619054	-0.691863	0.000173206	0.00491874	ZC3H7A	zinc finger CCCH-type containing 7A [Source:HGNC Symbol;Acc:30959]
ENSCPOG00000003261	94.5948	128.161	61.0281	0.476181	-1.07042	0.000175722	0.00498176
ENSCPOG00000002882	57.0419	77.9661	36.1177	0.463249	-1.11014	0.00017684	0.00499708	METTL15	methyltransferase like 15 [Source:HGNC Symbol;Acc:26606]
ENSCPOG00000026182	236.233	170.856	301.611	1.7653	0.81991	0.000176859	0.00499708	TPRA1	transmembrane protein, adipocyte asscociated 1 [Source:HGNC Symbol;Acc:30413]
ENSCPOG00000013291	197.065	138.572	255.558	1.84423	0.883016	0.000177668	0.0050115	MRPL48	mitochondrial ribosomal protein L48 [Source:HGNC Symbol;Acc:16653]
ENSCPOG00000021313	247.311	304.474	190.147	0.624509	-0.679206	0.000187972	0.00529323	TNXB	tenascin XB [Source:HGNC Symbol;Acc:11976]
ENSCPOG00000021076	36.3262	52.5759	20.0764	0.381855	-1.3889	0.000189986	0.00533506
ENSCPOG00000011194	67.1086	89.6623	44.5549	0.496919	-1.00892	0.000190094	0.00533506	DHDH	dihydrodiol dehydrogenase (dimeric) [Source:HGNC Symbol;Acc:17887]
ENSCPOG00000002250	4.30758	7.82393	0.79122	0.101128	-3.30574	0.000190604	0.00534041	C5	complement component 5 [Source:HGNC Symbol;Acc:1331]
ENSCPOG00000008718	64.339	87.1624	41.5157	0.476302	-1.07005	0.00019161	0.00535965	LYSMD4	LysM, putative peptidoglycan-binding, domain containing 4 [Source:HGNC Symbol;Acc:26571]
ENSCPOG00000027204	13.7549	21.8844	5.62535	0.257048	-1.95989	0.00019297	0.00538868
ENSCPOG00000015317	7.27543	2.88083	11.67	4.05094	2.01826	0.000194193	0.00541381	SCTR	secretin receptor [Source:HGNC Symbol;Acc:10608]
ENSCPOG00000010112	152.836	110.941	194.732	1.75527	0.811696	0.000194967	0.00542636	MCM2	minichromosome maintenance complex component 2 [Source:HGNC Symbol;Acc:6944]
ENSCPOG00000009676	464.608	310.428	618.788	1.99334	0.995188	0.00019536	0.00542828	AARS2	alanyl-tRNA synthetase 2, mitochondrial (putative) [Source:HGNC Symbol;Acc:21022]
ENSCPOG00000006025	17.5961	7.75581	27.4365	3.53754	1.82275	0.000196337	0.00544009	VDR	vitamin D (1,25- dihydroxyvitamin D3) receptor [Source:HGNC Symbol;Acc:12679]
ENSCPOG00000021034	50.9796	29.2222	72.7369	2.4891	1.31562	0.000196787	0.00544009	AFMID	arylformamidase [Source:HGNC Symbol;Acc:20910]
ENSCPOG00000007877	8.73897	3.75911	13.7188	3.64949	1.86769	0.000196917	0.00544009	DRD5	dopamine receptor D5 [Source:HGNC Symbol;Acc:3026]
ENSCPOG00000022204	8.83936	14.0846	3.59416	0.255185	-1.97039	0.000197084	0.00544009
ENSCPOG00000010203	140.24	179.454	101.026	0.562962	-0.82889	0.000199771	0.00550521	POLI	polymerase (DNA directed) iota [Source:HGNC Symbol;Acc:9182]
ENSCPOG00000012621	86.5732	117.767	55.379	0.470241	-1.08853	0.000201415	0.00554141
ENSCPOG00000013014	30.8056	43.1404	18.4708	0.428156	-1.22379	0.000202526	0.00556284	PNCK	pregnancy up-regulated non-ubiquitously expressed CaM kinase [Source:HGNC Symbol;Acc:13415]
ENSCPOG00000029707	3.30213	6.14684	0.457422	0.0744159	-3.74825	0.000203031	0.00556758	SNORA2	Small nucleolar RNA SNORA2/SNORA34 family [Source:RFAM;Acc:RF00410]
ENSCPOG00000008434	417.68	522.263	313.098	0.599502	-0.738163	0.000207223	0.00567323	PDK1	pyruvate dehydrogenase kinase, isozyme 1 [Source:HGNC Symbol;Acc:8809]
ENSCPOG00000003136	130.347	163.544	97.1499	0.594029	-0.751396	0.000207577	0.00567367
ENSCPOG00000021794	11.1902	17.0136	5.36679	0.315441	-1.66456	0.000209159	0.00570758	CXorf21	chromosome X open reading frame 21 [Source:HGNC Symbol;Acc:25667]
ENSCPOG00000023825	11.5151	5.38484	17.6454	3.27687	1.71232	0.000214678	0.00584867	PTPRCAP	protein tyrosine phosphatase, receptor type, C-associated protein [Source:HGNC Symbol;Acc:9667]
ENSCPOG00000006843	507.009	635.713	378.304	0.595085	-0.748831	0.000215097	0.00585057	DNAJC27	DnaJ (Hsp40) homolog, subfamily C, member 27 [Source:HGNC Symbol;Acc:30290]
ENSCPOG00000010563	13.2715	20.8382	5.70487	0.27377	-1.86897	0.000218256	0.00592686	SLC6A19	solute carrier family 6 (neutral amino acid transporter), member 19 [Source:HGNC Symbol;Acc:27960]
ENSCPOG00000024504	43.2272	58.7321	27.7223	0.472013	-1.0831	0.000220596	0.00598071	FZD2	frizzled family receptor 2 [Source:HGNC Symbol;Acc:4040]
ENSCPOG00000009129	492.407	300.083	684.73	2.2818	1.19017	0.00022454	0.00606903	INTS12	integrator complex subunit 12 [Source:HGNC Symbol;Acc:25067]
ENSCPOG00000024291	598.923	786.003	411.844	0.523972	-0.932438	0.000224578	0.00606903	PDYN_CAVPO	Proenkephalin-B Alpha-neoendorphin Beta-neoendorphin Big dynorphin Dynorphin A(1-17) Dynorphin A(1-13) Dynorphin A(1-8) Leu-enkephalin Rimorphin Leumorphin [Source:UniProtKB/Swiss-Prot;Acc:Q60478]
ENSCPOG00000003368	70.9772	96.5522	45.4023	0.470236	-1.08854	0.000225332	0.0060796	THUMPD2	THUMP domain containing 2 [Source:HGNC Symbol;Acc:14890]
ENSCPOG00000003183	72.5114	93.1953	51.8275	0.556117	-0.846539	0.000227053	0.0061162	MYBPHL	myosin binding protein H-like [Source:HGNC Symbol;Acc:30434]
ENSCPOG00000021341	88.1422	120.092	56.1919	0.467906	-1.09571	0.000227775	0.0061258	TMPRSS9	transmembrane protease, serine 9 [Source:HGNC Symbol;Acc:30079]
ENSCPOG00000003671	86.8752	59.1973	114.553	1.93511	0.952414	0.000233119	0.00625946	SLC52A3	solute carrier family 52, riboflavin transporter, member 3 [Source:HGNC Symbol;Acc:16187]
ENSCPOG00000010258	135.331	174.653	96.0083	0.549708	-0.863264	0.000234739	0.0062906	TMEM144	transmembrane protein 144 [Source:HGNC Symbol;Acc:25633]
ENSCPOG00000011507	1828	1190.55	2465.44	2.07084	1.05022	0.000235029	0.0062906	PRPF31	PRP31 pre-mRNA processing factor 31 homolog (S. cerevisiae) [Source:HGNC Symbol;Acc:15446]
ENSCPOG00000020125	63.5162	42.6248	84.4076	1.98025	0.985679	0.00023681	0.00632815	CLN5	ceroid-lipofuscinosis, neuronal 5 [Source:HGNC Symbol;Acc:2076]
ENSCPOG00000009549	15.4297	24.0709	6.7885	0.282021	-1.82613	0.000237249	0.00632978	SYCP2	synaptonemal complex protein 2 [Source:HGNC Symbol;Acc:11490]
ENSCPOG00000018816	3.07534	0.612568	5.5381	9.0408	3.17645	0.000237809	0.00633464	SNORA2	Small nucleolar RNA SNORA2/SNORA34 family [Source:RFAM;Acc:RF00410]
ENSCPOG00000012531	614.085	477.303	750.867	1.57315	0.653652	0.000239125	0.00635954	YEATS2	YEATS domain containing 2 [Source:HGNC Symbol;Acc:25489]
ENSCPOG00000007157	1158.59	716.097	1601.09	2.23586	1.16083	0.000239503	0.00635954	COL16A1	collagen, type XVI, alpha 1 [Source:HGNC Symbol;Acc:2193]
ENSCPOG00000020358	86.1372	48.6311	123.643	2.54247	1.34623	0.000241143	0.00639297
ENSCPOG00000025147	116.96	150.89	83.0308	0.550275	-0.861776	0.000242602	0.00642147	RGS20	regulator of G-protein signaling 20 [Source:HGNC Symbol;Acc:14600]
ENSCPOG00000013330	89.9047	120.269	59.5408	0.495065	-1.01431	0.000243473	0.00643438	TSEN15	tRNA splicing endonuclease 15 homolog (S. cerevisiae) [Source:HGNC Symbol;Acc:16791]
ENSCPOG00000001665	24.7618	34.8722	14.6513	0.420143	-1.25105	0.000243914	0.00643586	POLN	polymerase (DNA directed) nu [Source:HGNC Symbol;Acc:18870]
ENSCPOG00000005132	32.186	4.57939	59.7925	13.0569	3.70674	0.000244619	0.00643735	TGM4	transglutaminase 4 (prostate) [Source:HGNC Symbol;Acc:11780]
ENSCPOG00000004760	243.605	157.503	329.707	2.09333	1.0658	0.000244739	0.00643735	C17orf61	chromosome 17 open reading frame 61 [Source:HGNC Symbol;Acc:28618]
ENSCPOG00000006697	249.825	318.173	181.477	0.570373	-0.810023	0.000246188	0.00646534	NPNT	nephronectin [Source:HGNC Symbol;Acc:27405]
ENSCPOG00000002640	11.9314	19.0793	4.78354	0.250719	-1.99586	0.00024696	0.00647545
ENSCPOG00000021574	16.1774	7.7105	24.6443	3.1962	1.67636	0.000248356	0.00650189	CABP5	calcium binding protein 5 [Source:HGNC Symbol;Acc:13714]
ENSCPOG00000001307	1311.26	986.056	1636.47	1.65961	0.730842	0.000253968	0.00663844	SKIV2L	superkiller viralicidic activity 2-like (S. cerevisiae) [Source:HGNC Symbol;Acc:10898]
ENSCPOG00000025342	57.1514	76.9578	37.345	0.485266	-1.04315	0.000255489	0.00666777
ENSCPOG00000024223	231.364	171.393	291.336	1.69981	0.765375	0.00025978	0.00676923	ANKRD54	ankyrin repeat domain 54 [Source:HGNC Symbol;Acc:25185]
ENSCPOG00000020228	2.80093	0.448608	5.15325	11.4872	3.52196	0.000262551	0.00683081
ENSCPOG00000019938	3.07898	5.75928	0.398689	0.0692255	-3.85255	0.000265819	0.0069051	Vault	Vault RNA [Source:RFAM;Acc:RF00006]
ENSCPOG00000015257	1050.19	1307.39	792.999	0.606554	-0.721293	0.000267528	0.00693876
ENSCPOG00000004564	63.2505	83.8254	42.6756	0.509101	-0.973976	0.000269347	0.00696705	HENMT1	HEN1 methyltransferase homolog 1 (Arabidopsis) [Source:HGNC Symbol;Acc:26400]
ENSCPOG00000024056	34.3624	47.5167	21.2081	0.446328	-1.16382	0.000269451	0.00696705	IL12RB2	interleukin 12 receptor, beta 2 [Source:HGNC Symbol;Acc:5972]
ENSCPOG00000012496	81.0917	55.155	107.028	1.9405	0.956429	0.00027177	0.00700868	CENPW	centromere protein W [Source:HGNC Symbol;Acc:21488]
ENSCPOG00000027487	7.2544	14.5088	0	0	#NAME?	0.000271897	0.00700868
ENSCPOG00000008677	4089.92	2237.03	5942.81	2.65656	1.40956	0.000273269	0.00703321	KIAA0430	KIAA0430 [Source:HGNC Symbol;Acc:29562]
ENSCPOG00000005561	110.359	138.891	81.8274	0.589148	-0.763297	0.000274058	0.00704271	PTRHD1	peptidyl-tRNA hydrolase domain containing 1 [Source:HGNC Symbol;Acc:33782]
ENSCPOG00000007071	33.9388	17.4481	50.4295	2.89026	1.5312	0.0002796	0.00717412	CHRDL2	chordin-like 2 [Source:HGNC Symbol;Acc:24168]
ENSCPOG00000023932	76.1473	101.711	50.5834	0.497323	-1.00774	0.000286506	0.00734006
ENSCPOG00000008555	357.389	431.335	283.442	0.657127	-0.605756	0.000287048	0.00734272	PRCP	prolylcarboxypeptidase (angiotensinase C) [Source:HGNC Symbol;Acc:9344]
ENSCPOG00000003632	146.815	189.164	104.466	0.552248	-0.856612	0.000290205	0.00741218	DNAH11	dynein, axonemal, heavy chain 11 [Source:HGNC Symbol;Acc:2942]
ENSCPOG00000002241	168.865	123.911	213.82	1.7256	0.787095	0.000295384	0.00753297	Q0WXW9_CAVPO	Sorbitol dehydrogenase [Source:UniProtKB/TrEMBL;Acc:Q0WXW9]
ENSCPOG00000011699	4.15439	1.36436	6.94443	5.08988	2.34763	0.000298151	0.00759197
ENSCPOG00000005074	109.74	77.905	141.574	1.81726	0.861768	0.000300613	0.00764304	XDH	xanthine dehydrogenase [Source:HGNC Symbol;Acc:12805]
ENSCPOG00000004817	2.62552	4.81175	0.439287	0.0912947	-3.45333	0.000301611	0.00765682	C10orf122	chromosome 10 open reading frame 122 [Source:HGNC Symbol;Acc:31653]
ENSCPOG00000001505	41.4887	24.7652	58.2123	2.35057	1.23301	0.000304875	0.00772796
ENSCPOG00000000035	478.411	596.441	360.381	0.60422	-0.726855	0.00031162	0.00788701	RPA1	replication protein A1, 70kDa [Source:HGNC Symbol;Acc:10289]
ENSCPOG00000001238	139.158	182.584	95.7329	0.524324	-0.931471	0.000315072	0.0079461	HLTF	helicase-like transcription factor [Source:HGNC Symbol;Acc:11099]
ENSCPOG00000002724	121.215	154.697	87.7339	0.567135	-0.818236	0.00031529	0.0079461	DCLRE1C	DNA cross-link repair 1C [Source:HGNC Symbol;Acc:17642]
ENSCPOG00000010999	47.5736	30.355	64.7922	2.13448	1.09389	0.000315512	0.0079461	COLEC11	collectin sub-family member 11 [Source:HGNC Symbol;Acc:17213]
ENSCPOG00000003986	31.5887	17.0036	46.1737	2.71553	1.44123	0.000315852	0.0079461	ZC2HC1C	zinc finger, C2HC-type containing 1C [Source:HGNC Symbol;Acc:20354]
ENSCPOG00000023076	526.213	654.903	397.524	0.606996	-0.720241	0.00031656	0.00795198	PCDHAC1	protocadherin alpha subfamily C, 1 [Source:HGNC Symbol;Acc:8676]
ENSCPOG00000009677	1.22171	0	2.44342	Inf	Inf	0.000324697	0.00814417	SLC36A3	solute carrier family 36 (proton/amino acid symporter), member 3 [Source:HGNC Symbol;Acc:19659]
ENSCPOG00000007879	318.15	399.753	236.546	0.59173	-0.75699	0.000329572	0.00825407
ENSCPOG00000025936	991.967	646.515	1337.42	2.06866	1.0487	0.00033627	0.00840925	MRPL38	mitochondrial ribosomal protein L38 [Source:HGNC Symbol;Acc:14033]
ENSCPOG00000004319	24.6385	13.3298	35.9472	2.69676	1.43123	0.000337712	0.00843097	XYLB	xylulokinase homolog (H. influenzae) [Source:HGNC Symbol;Acc:12839]
ENSCPOG00000011123	25.2868	13.9233	36.6502	2.63229	1.39632	0.000338145	0.00843097
ENSCPOG00000002280	286.818	365.571	208.066	0.569152	-0.813114	0.000339157	0.00844364	DCLK3	doublecortin-like kinase 3 [Source:HGNC Symbol;Acc:19005]
ENSCPOG00000001370	129.133	170.018	88.2485	0.519054	-0.946043	0.000341555	0.00849074	SOWAHC	sosondowah ankyrin repeat domain family member C [Source:HGNC Symbol;Acc:26149]
ENSCPOG00000009889	131.819	93.243	170.394	1.82742	0.869812	0.000344169	0.00853221	RHBDF2	rhomboid 5 homolog 2 (Drosophila) [Source:HGNC Symbol;Acc:20788]
ENSCPOG00000014838	17.0153	24.0231	10.0076	0.41658	-1.26333	0.000344242	0.00853221	BCMO1	beta-carotene 15,15'-monooxygenase 1 [Source:HGNC Symbol;Acc:13815]
ENSCPOG00000000697	208.32	263.194	153.446	0.583013	-0.778401	0.00034559	0.00855298	TTC8	tetratricopeptide repeat domain 8 [Source:HGNC Symbol;Acc:20087]
ENSCPOG00000024316	7.32344	13.0246	1.62226	0.124553	-3.00516	0.000349142	0.00862812
ENSCPOG00000025848	58.7394	79.5347	37.9441	0.477077	-1.06771	0.000349795	0.00863155	C9orf85	chromosome 9 open reading frame 85 [Source:HGNC Symbol;Acc:28784]
ENSCPOG00000003954	329.828	419.133	240.523	0.573859	-0.801232	0.000351591	0.00866311	ZNF317	zinc finger protein 317 [Source:HGNC Symbol;Acc:13507]
ENSCPOG00000009292	477.821	584.664	370.978	0.634514	-0.656276	0.000354768	0.00872854	IFNGR2	interferon gamma receptor 2 (interferon gamma transducer 1) [Source:HGNC Symbol;Acc:5440]
ENSCPOG00000020477	9.1415	3.88782	14.3952	3.70264	1.88855	0.000359159	0.00882363
ENSCPOG00000008617	267.106	323.382	210.831	0.651958	-0.617149	0.000361939	0.00887891	FRMPD1	FERM and PDZ domain containing 1 [Source:HGNC Symbol;Acc:29159]
ENSCPOG00000022169	188.746	143.214	234.279	1.63587	0.710054	0.000363519	0.00890461	PER3	period homolog 3 (Drosophila) [Source:HGNC Symbol;Acc:8847]
ENSCPOG00000027611	12.2551	19.4574	5.05268	0.259678	-1.9452	0.000368971	0.00902497
ENSCPOG00000027113	679.382	540.958	817.807	1.51178	0.596245	0.000370597	0.00905154	ALDH5A1	aldehyde dehydrogenase 5 family, member A1 [Source:HGNC Symbol;Acc:408]
ENSCPOG00000021715	2.83386	0.444016	5.22371	11.7647	3.55639	0.000371562	0.0090619
ENSCPOG00000002125	973.168	1373.15	573.188	0.417426	-1.26041	0.000378226	0.00921102	NCAM2	neural cell adhesion molecule 2 [Source:HGNC Symbol;Acc:7657]
ENSCPOG00000000099	26.7897	11.0179	42.5614	3.86293	1.94969	0.000380071	0.00924252	PRRG4	proline rich Gla (G-carboxyglutamic acid) 4 (transmembrane) [Source:HGNC Symbol;Acc:30799]
ENSCPOG00000015675	22.1351	32.421	11.8492	0.365478	-1.45214	0.000382102	0.00927843	GLRA4	glycine receptor, alpha 4 [Source:HGNC Symbol;Acc:31715]
ENSCPOG00000008204	13.3546	6.22387	20.4854	3.29142	1.71871	0.000384966	0.00933446	LAMC2	laminin, gamma 2 [Source:HGNC Symbol;Acc:6493]
ENSCPOG00000008645	190.919	148.213	233.624	1.57627	0.656517	0.000389418	0.00942875	HMGCL	3-hydroxymethyl-3-methylglutaryl-CoA lyase [Source:HGNC Symbol;Acc:5005]
ENSCPOG00000015512	68.0229	90.2638	45.782	0.507202	-0.979369	0.000392048	0.00947875	Q0PIU2_CAVPO	Angiopoietin-2 [Source:UniProtKB/TrEMBL;Acc:Q0PIU2]
ENSCPOG00000010766	15.6308	23.7185	7.54319	0.31803	-1.65276	0.0003929	0.00948566	GPR111	G protein-coupled receptor 111 [Source:HGNC Symbol;Acc:18991]
ENSCPOG00000000962	175.285	224.781	125.79	0.55961	-0.837507	0.000397135	0.00957409	LIPA	lipase A, lysosomal acid, cholesterol esterase [Source:HGNC Symbol;Acc:6617]
ENSCPOG00000007596	15.7001	23.7196	7.68049	0.323803	-1.62681	0.000407911	0.00981975	TNFRSF9	tumor necrosis factor receptor superfamily, member 9 [Source:HGNC Symbol;Acc:11924]
ENSCPOG00000002610	123.557	156.188	90.9258	0.582155	-0.780525	0.000413901	0.00994966	NAGS	N-acetylglutamate synthase [Source:HGNC Symbol;Acc:17996]
ENSCPOG00000001765	3084.14	2514.34	3653.93	1.45323	0.539268	0.000416222	0.00999112	MAN2A2	mannosidase, alpha, class 2A, member 2 [Source:HGNC Symbol;Acc:6825]
ENSCPOG00000022885	6.00224	9.87575	2.12874	0.215552	-2.21389	0.000418724	0.0100368	PRSS38	protease, serine, 38 [Source:HGNC Symbol;Acc:29625]
ENSCPOG00000024532	35.3741	20.7193	50.0289	2.4146	1.27178	0.000420304	0.0100603
ENSCPOG00000005825	557.808	684.1	431.515	0.630778	-0.664797	0.000423323	0.0101048	CEP104	centrosomal protein 104kDa [Source:HGNC Symbol;Acc:24866]
ENSCPOG00000024809	2.67746	4.91562	0.439287	0.0893655	-3.48414	0.00042382	0.0101048	Cyp11b2	cytochrome P450 11B2, mitochondrial [Source:RefSeq peptide;Acc:NP_001166566]
ENSCPOG00000012789	22.6514	33.9948	11.308	0.332638	-1.58797	0.000423972	0.0101048	CD6	CD6 molecule [Source:HGNC Symbol;Acc:1691]
ENSCPOG00000002920	48.9182	66.669	31.1675	0.467496	-1.09698	0.00042461	0.0101056	PDCD2	programmed cell death 2 [Source:HGNC Symbol;Acc:8762]
ENSCPOG00000014235	130.565	91.0497	170.08	1.86799	0.901487	0.000425484	0.010112	PARP10	poly (ADP-ribose) polymerase family, member 10 [Source:HGNC Symbol;Acc:25895]
ENSCPOG00000004929	31.8661	46.1721	17.5602	0.38032	-1.39472	0.000426705	0.0101267	A3QRJ8_CAVPO	toll-like receptor 3 [Source:RefSeq peptide;Acc:NP_001166500]
ENSCPOG00000007061	433.065	310.627	555.503	1.78833	0.83861	0.000429847	0.0101868	PTCHD2	patched domain containing 2 [Source:HGNC Symbol;Acc:29251]
ENSCPOG00000001433	64.9244	89.5821	40.2667	0.449495	-1.15362	0.00043057	0.0101896	MPZL2	myelin protein zero-like 2 [Source:HGNC Symbol;Acc:3496]
ENSCPOG00000025093	53.9624	74.2056	33.7192	0.454402	-1.13796	0.000431635	0.0102004
ENSCPOG00000026830	70.4569	102.472	38.4415	0.37514	-1.4145	0.000433984	0.0102414	ATP2C2	ATPase, Ca++ transporting, type 2C, member 2 [Source:HGNC Symbol;Acc:29103]
ENSCPOG00000028532	32.1105	19.415	44.806	2.30781	1.20652	0.000439215	0.0103503	snoU2-25	Small nucleolar RNA U2-25 [Source:RFAM;Acc:RF01268]
ENSCPOG00000009580	5.53508	9.39894	1.67122	0.177809	-2.4916	0.000442612	0.010412	ZWINT	ZW10 interactor [Source:HGNC Symbol;Acc:13195]
ENSCPOG00000009618	68.7217	88.8674	48.576	0.546612	-0.871411	0.000443077	0.010412	CASP8	caspase 8, apoptosis-related cysteine peptidase [Source:HGNC Symbol;Acc:1509]
ENSCPOG00000026645	123.058	156.957	89.1585	0.568045	-0.815923	0.000443904	0.0104168	LMO2	LIM domain only 2 (rhombotin-like 1) [Source:HGNC Symbol;Acc:6642]
ENSCPOG00000004834	155.485	83.4869	227.484	2.72478	1.44614	0.00044503	0.0104286	UROS	uroporphyrinogen III synthase [Source:HGNC Symbol;Acc:12592]
ENSCPOG00000010772	7.9809	3.05911	12.9027	4.21779	2.07649	0.000451743	0.0105712	Ces1d	carboxylesterase 3 [Source:RefSeq peptide;Acc:NP_001166580]
ENSCPOG00000026037	95.5094	69.9088	121.11	1.7324	0.792772	0.00045494	0.0106311	FBXW12	F-box and WD repeat domain containing 12 [Source:HGNC Symbol;Acc:20729]
ENSCPOG00000021736	13.5992	6.9858	20.2127	2.8934	1.53277	0.000456529	0.0106534	KIF11	kinesin family member 11 [Source:HGNC Symbol;Acc:6388]
ENSCPOG00000025887	16.1825	23.1867	9.17821	0.39584	-1.33701	0.000458483	0.0106841	TEKT1	tektin 1 [Source:HGNC Symbol;Acc:15534]
ENSCPOG00000021336	169.468	205.846	133.089	0.64655	-0.629167	0.000460872	0.0107249
ENSCPOG00000006727	296.592	375.031	218.152	0.581691	-0.781675	0.000468184	0.0108799	VCAM1	vascular cell adhesion molecule 1 [Source:HGNC Symbol;Acc:12663]
ENSCPOG00000002524	66.285	88.9274	43.6426	0.490767	-1.02689	0.000470918	0.0109283	Q07E12_CAVPO	Caveolin [Source:UniProtKB/TrEMBL;Acc:Q07E12]
ENSCPOG00000000331	185.533	276.012	95.0539	0.344383	-1.53792	0.000473567	0.0109746	OTOF	otoferlin [Source:HGNC Symbol;Acc:8515]
ENSCPOG00000023678	1.06674	0	2.13347	Inf	Inf	0.000474592	0.0109831	PRDM13	PR domain containing 13 [Source:HGNC Symbol;Acc:13998]
ENSCPOG00000026578	197.675	136.182	259.168	1.90311	0.928358	0.000481973	0.0111253
ENSCPOG00000000273	108.547	138.475	78.6186	0.567746	-0.816682	0.000482063	0.0111253
ENSCPOG00000001438	10.1912	16.4423	3.94007	0.23963	-2.06112	0.000487897	0.0112444	IMPA2	inositol(myo)-1(or 4)-monophosphatase 2 [Source:HGNC Symbol;Acc:6051]
ENSCPOG00000011927	316.997	402.905	231.088	0.573555	-0.801996	0.0004902	0.011282	AK3	adenylate kinase 3 [Source:HGNC Symbol;Acc:17376]
ENSCPOG00000026817	219.153	165.894	272.412	1.64209	0.715533	0.000494988	0.0113766	WNT7B	wingless-type MMTV integration site family, member 7B [Source:HGNC Symbol;Acc:12787]
ENSCPOG00000013458	28.9975	41.0027	16.9924	0.41442	-1.27083	0.000497924	0.0114136	OCA2	oculocutaneous albinism II [Source:HGNC Symbol;Acc:8101]
ENSCPOG00000009971	1.39093	0.1133	2.66856	23.553	4.55784	0.000497962	0.0114136	GUCA1B	guanylate cyclase activator 1B (retina) [Source:HGNC Symbol;Acc:4679]
ENSCPOG00000002265	47.4882	64.9474	30.0289	0.462358	-1.11292	0.000498656	0.0114139	LPCAT2	lysophosphatidylcholine acyltransferase 2 [Source:HGNC Symbol;Acc:26032]
ENSCPOG00000004599	6.87768	11.2982	2.45718	0.217485	-2.20101	0.000499528	0.0114183	LCT	lactase [Source:HGNC Symbol;Acc:6530]
ENSCPOG00000000779	37.9741	23.5017	52.4465	2.23161	1.15808	0.000503769	0.0114838	EGF	epidermal growth factor [Source:HGNC Symbol;Acc:3229]
ENSCPOG00000007242	12.31	5.63111	18.9889	3.37214	1.75366	0.000504322	0.0114838	HNF1A	HNF1 homeobox A [Source:HGNC Symbol;Acc:11621]
ENSCPOG00000021717	162.512	113.849	211.176	1.85488	0.891324	0.00050508	0.0114838	MSMP	microseminoprotein, prostate associated [Source:HGNC Symbol;Acc:29663]
ENSCPOG00000025948	181.825	136.445	227.204	1.66517	0.735667	0.000505135	0.0114838
ENSCPOG00000012429	55.693	77.0413	34.3448	0.445797	-1.16554	0.000507928	0.0115316
ENSCPOG00000024890	112.237	66.5547	157.92	2.37278	1.24658	0.000508981	0.0115399	MAMDC4	MAM domain containing 4 [Source:HGNC Symbol;Acc:24083]
ENSCPOG00000023813	194.082	144.099	244.065	1.69373	0.760201	0.000510335	0.0115549	MXRA8	matrix-remodelling associated 8 [Source:HGNC Symbol;Acc:7542]
ENSCPOG00000019498	91.5403	62.2428	120.838	1.94139	0.957093	0.000518745	0.0117295	B9D2	B9 protein domain 2 [Source:HGNC Symbol;Acc:28636]
ENSCPOG00000009842	161.897	206.206	117.587	0.570241	-0.810355	0.000520502	0.0117534	HEG1	HEG homolog 1 (zebrafish) [Source:HGNC Symbol;Acc:29227]
ENSCPOG00000020909	1022.08	789.425	1254.74	1.58943	0.668512	0.000521479	0.0117596	PLOD1	procollagen-lysine, 2-oxoglutarate 5-dioxygenase 1 [Source:HGNC Symbol;Acc:9081]
ENSCPOG00000017423	19.6133	2.38164	36.8451	15.4705	3.95145	0.000531142	0.0119539
ENSCPOG00000012980	104.663	75.1135	134.212	1.78679	0.837373	0.00053152	0.0119539	IFT74	intraflagellar transport 74 homolog (Chlamydomonas) [Source:HGNC Symbol;Acc:21424]
ENSCPOG00000023575	22.1672	31.3104	13.0241	0.415966	-1.26546	0.000533566	0.0119838
ENSCPOG00000022546	111.645	144.737	78.5525	0.542727	-0.8817	0.000537256	0.0120505	PARP9	poly (ADP-ribose) polymerase family, member 9 [Source:HGNC Symbol;Acc:24118]
ENSCPOG00000004239	14.1677	21.3005	7.03492	0.330271	-1.59828	0.000538498	0.0120622	MGMT	O-6-methylguanine-DNA methyltransferase [Source:HGNC Symbol;Acc:7059]
ENSCPOG00000000934	127.046	164.278	89.8136	0.546715	-0.871138	0.000541214	0.0121069	POLK	polymerase (DNA directed) kappa [Source:HGNC Symbol;Acc:9183]
ENSCPOG00000002325	32.269	19.0261	45.512	2.39208	1.25827	0.000542651	0.0121228	ASPA	aspartoacylase [Source:HGNC Symbol;Acc:756]
ENSCPOG00000009657	53.5754	36.4446	70.7061	1.9401	0.956128	0.000547848	0.0122226	PRELP	proline/arginine-rich end leucine-rich repeat protein [Source:HGNC Symbol;Acc:9357]
ENSCPOG00000006312	42.6415	26.4967	58.7863	2.21862	1.14967	0.000549558	0.0122445	C11orf80	chromosome 11 open reading frame 80 [Source:HGNC Symbol;Acc:26197]
ENSCPOG00000007399	8.07344	12.8622	3.2847	0.255376	-1.9693	0.00056008	0.0124623	SLC27A2	solute carrier family 27 (fatty acid transporter), member 2 [Source:HGNC Symbol;Acc:10996]
ENSCPOG00000013956	15.3704	4.06874	26.672	6.55535	2.71267	0.000561635	0.0124804
ENSCPOG00000015239	5.86775	9.95548	1.78001	0.178797	-2.48361	0.000563468	0.0125045	PPP1R27	protein phosphatase 1, regulatory subunit 27 [Source:HGNC Symbol;Acc:16813]
ENSCPOG00000022782	38.1355	53.48	22.7911	0.426161	-1.23053	0.00056591	0.0125421	WDPCP	WD repeat containing planar cell polarity effector [Source:HGNC Symbol;Acc:28027]
ENSCPOG00000006957	2.88384	0.202412	5.56527	27.4947	4.78108	0.00056958	0.0126068	CORIN	corin, serine peptidase [Source:HGNC Symbol;Acc:19012]
ENSCPOG00000003246	17.6751	9.75665	25.5935	2.62318	1.39132	0.000572922	0.012664	SIX2	SIX homeobox 2 [Source:HGNC Symbol;Acc:10888]
ENSCPOG00000021450	3.86879	6.9723	0.765284	0.109761	-3.18757	0.000578779	0.0127766	RPS10	ribosomal protein S10 [Source:HGNC Symbol;Acc:10383]
ENSCPOG00000006913	70.3622	46.2527	94.4716	2.04251	1.03034	0.000579546	0.0127767	CCDC8	coiled-coil domain containing 8 [Source:HGNC Symbol;Acc:25367]
ENSCPOG00000020237	98.1279	122.002	74.2535	0.608623	-0.716379	0.0005868	0.0129196	GNB1L	guanine nucleotide binding protein (G protein), beta polypeptide 1-like [Source:HGNC Symbol;Acc:4397]
ENSCPOG00000021381	1.25732	2.51465	0	0	#NAME?	0.000606236	0.01333	SLC38A5	solute carrier family 38, member 5 [Source:HGNC Symbol;Acc:18070]
ENSCPOG00000000192	9.86579	4.12917	15.6024	3.77858	1.91784	0.000609474	0.0133669	ART5	ADP-ribosyltransferase 5 [Source:HGNC Symbol;Acc:24049]
ENSCPOG00000020407	54.1662	19.7333	88.5991	4.48984	2.16666	0.00060951	0.0133669	RBPJL	recombination signal binding protein for immunoglobulin kappa J region-like [Source:HGNC Symbol;Acc:13761]
ENSCPOG00000025822	1.94915	3.77941	0.118889	0.0314572	-4.99047	0.000612014	0.0133961
ENSCPOG00000011078	82.3711	54.7759	109.966	2.00757	1.00545	0.000612438	0.0133961	MINA	MYC induced nuclear antigen [Source:HGNC Symbol;Acc:19441]
ENSCPOG00000015295	1.90813	3.69737	0.118889	0.0321551	-4.95881	0.000614836	0.013431
ENSCPOG00000017402	124.818	48.4632	201.172	4.15103	2.05347	0.000626976	0.0136784
ENSCPOG00000026794	50.545	31.584	69.506	2.20067	1.13794	0.000628426	0.0136819	MRPL33	mitochondrial ribosomal protein L33 [Source:HGNC Symbol;Acc:14487]
ENSCPOG00000010398	137.802	174.289	101.315	0.581306	-0.782629	0.00062877	0.0136819	ABCB10	ATP-binding cassette, sub-family B (MDR/TAP), member 10 [Source:HGNC Symbol;Acc:41]
ENSCPOG00000013737	8.2013	3.5982	12.8044	3.55855	1.83129	0.000634159	0.0137812	C8orf83	chromosome 8 open reading frame 83 [Source:HGNC Symbol;Acc:27828]
ENSCPOG00000010086	35.8553	21.712	49.9987	2.30282	1.2034	0.000638795	0.0138504
ENSCPOG00000015711	24.3425	13.8754	34.8097	2.50874	1.32696	0.000640298	0.0138504	C1orf194	chromosome 1 open reading frame 194 [Source:HGNC Symbol;Acc:32331]
ENSCPOG00000012351	506.88	352.711	661.049	1.87419	0.906268	0.000640646	0.0138504	RFC2	replication factor C (activator 1) 2, 40kDa [Source:HGNC Symbol;Acc:9970]
ENSCPOG00000022601	334.057	409.752	258.362	0.630532	-0.665359	0.000640649	0.0138504
ENSCPOG00000002553	338.699	258.547	418.851	1.62002	0.696013	0.000642345	0.0138692	STK36	serine/threonine kinase 36 [Source:HGNC Symbol;Acc:17209]
ENSCPOG00000004254	7.84239	13.397	2.28777	0.170767	-2.5499	0.000652749	0.0140757
ENSCPOG00000013859	893.986	1085.94	702.034	0.646478	-0.629327	0.000657537	0.0141607	LSS	lanosterol synthase (2,3-oxidosqualene-lanosterol cyclase) [Source:HGNC Symbol;Acc:6708]
ENSCPOG00000023783	4.53775	1.69744	7.37807	4.3466	2.11989	0.00066872	0.0143831
ENSCPOG00000009337	28.1044	40.3598	15.8489	0.392691	-1.34853	0.000670178	0.0143959	ADAMTS17	ADAM metallopeptidase with thrombospondin type 1 motif, 17 [Source:HGNC Symbol;Acc:17109]
ENSCPOG00000005087	539.54	421.764	657.315	1.55849	0.640149	0.000680309	0.0145908	CARS	cysteinyl-tRNA synthetase [Source:HGNC Symbol;Acc:1493]
ENSCPOG00000009171	80.5106	104.596	56.425	0.539455	-0.890425	0.00068176	0.0145908	MORN2	MORN repeat containing 2 [Source:HGNC Symbol;Acc:30166]
ENSCPOG00000006432	2425.55	1942.01	2909.09	1.49798	0.583017	0.000681863	0.0145908	GHITM	growth hormone inducible transmembrane protein [Source:HGNC Symbol;Acc:17281]
ENSCPOG00000005607	67.7011	43.6289	91.7733	2.1035	1.07279	0.0006914	0.014776	S100A3	S100 calcium binding protein A3 [Source:HGNC Symbol;Acc:10493]
ENSCPOG00000012226	34.3408	20.6471	48.0345	2.32645	1.21813	0.000694969	0.0148334	AVIL	advillin [Source:HGNC Symbol;Acc:14188]
ENSCPOG00000020321	157.113	211.01	103.216	0.489152	-1.03164	0.000699227	0.0149053
ENSCPOG00000021687	24.077	14.0834	34.0706	2.41921	1.27453	0.000702727	0.0149439	C17orf53	chromosome 17 open reading frame 53 [Source:HGNC Symbol;Acc:28460]
ENSCPOG00000008797	416.91	315.337	518.483	1.64422	0.717403	0.000702825	0.0149439	FBLN1	fibulin 1 [Source:HGNC Symbol;Acc:3600]
ENSCPOG00000001871	48.6537	66.2495	31.0579	0.468803	-1.09295	0.000704797	0.0149627	CENPC1	centromere protein C 1 [Source:HGNC Symbol;Acc:1854]
ENSCPOG00000002867	40.9682	26.7116	55.2247	2.06745	1.04785	0.000705491	0.0149627	CRISPLD1	cysteine-rich secretory protein LCCL domain containing 1 [Source:HGNC Symbol;Acc:18206]
ENSCPOG00000013132	15.2784	23.018	7.53878	0.327517	-1.61036	0.000706666	0.0149686	CALHM3	calcium homeostasis modulator 3 [Source:HGNC Symbol;Acc:23458]
ENSCPOG00000027616	28.9261	41.4683	16.3839	0.395094	-1.33973	0.000710632	0.0150336
ENSCPOG00000006956	205.989	264.667	147.311	0.55659	-0.845314	0.000712014	0.0150439	UFL1	UFM1-specific ligase 1 [Source:HGNC Symbol;Acc:23039]
ENSCPOG00000026774	3.21494	0.327806	6.10207	18.6149	4.21839	0.000717671	0.0151443	TNNI1	troponin I type 1 (skeletal, slow) [Source:HGNC Symbol;Acc:11945]
ENSCPOG00000002887	220.359	267.274	173.444	0.648935	-0.623853	0.000724241	0.0152637
ENSCPOG00000013442	136.245	103.886	168.603	1.62296	0.69863	0.00072836	0.0153313	ISM1	isthmin 1 homolog (zebrafish) [Source:HGNC Symbol;Acc:16213]
ENSCPOG00000014386	77.7294	102.485	52.974	0.516895	-0.952056	0.000730384	0.0153546	CCDC14	coiled-coil domain containing 14 [Source:HGNC Symbol;Acc:25766]
ENSCPOG00000021036	1.13232	2.26464	0	0	#NAME?	0.000737097	0.0154763	5S_rRNA	5S ribosomal RNA [Source:RFAM;Acc:RF00001]
ENSCPOG00000020100	87.5089	119.737	55.2812	0.461691	-1.115	0.00073878	0.0154814
ENSCPOG00000012770	80.7483	57.9762	103.52	1.78557	0.836382	0.000739187	0.0154814	DNAH9	dynein, axonemal, heavy chain 9 [Source:HGNC Symbol;Acc:2953]
ENSCPOG00000006502	110.424	142.308	78.5405	0.551906	-0.857507	0.000745502	0.0155941	STK10	serine/threonine kinase 10 [Source:HGNC Symbol;Acc:11388]
ENSCPOG00000024945	9.97636	0.303185	19.6495	64.8104	6.01815	0.00075135	0.0156968	RPS14	ribosomal protein S14 [Source:HGNC Symbol;Acc:10387]
ENSCPOG00000008903	24.9168	34.7392	15.0944	0.434505	-1.20255	0.000754805	0.0157494	STK17B	serine/threonine kinase 17b [Source:HGNC Symbol;Acc:11396]
ENSCPOG00000001377	3.76553	6.29517	1.2359	0.196325	-2.34869	0.000756901	0.0157735	FBXL13	F-box and leucine-rich repeat protein 13 [Source:HGNC Symbol;Acc:21658]
ENSCPOG00000014754	23.486	34.0104	12.9617	0.381109	-1.39172	0.000759487	0.0158077	PRC1	protein regulator of cytokinesis 1 [Source:HGNC Symbol;Acc:9341]
ENSCPOG00000022305	6.64966	2.39413	10.9052	4.55497	2.18744	0.000760515	0.0158095	NR5A1	nuclear receptor subfamily 5, group A, member 1 [Source:HGNC Symbol;Acc:7983]
ENSCPOG00000010248	395.542	487.406	303.679	0.623052	-0.682575	0.00076466	0.0158653	IFNAR1	interferon (alpha, beta and omega) receptor 1 [Source:HGNC Symbol;Acc:5432]
ENSCPOG00000027570	109.896	75.8486	143.943	1.89777	0.924305	0.000765095	0.0158653	FAM211A	family with sequence similarity 211, member A [Source:HGNC Symbol;Acc:32403]
ENSCPOG00000006726	100.179	130.014	70.3444	0.54105	-0.886165	0.000777859	0.0161101	CYP39A1	cytochrome P450, family 39, subfamily A, polypeptide 1 [Source:HGNC Symbol;Acc:17449]
ENSCPOG00000014982	1133.47	884.6	1382.34	1.56267	0.644016	0.000780441	0.0161386	KIRREL3	kin of IRRE like 3 (Drosophila) [Source:HGNC Symbol;Acc:23204]
ENSCPOG00000009282	382.777	474.817	290.736	0.612311	-0.707664	0.000781162	0.0161386	SNX4	sorting nexin 4 [Source:HGNC Symbol;Acc:11175]
ENSCPOG00000020119	41.8942	57.235	26.5534	0.463936	-1.108	0.000788175	0.0162484	EFCAB4B	EF-hand calcium binding domain 4B [Source:HGNC Symbol;Acc:28657]
ENSCPOG00000009122	55.664	75.88	35.4481	0.46716	-1.09801	0.000788417	0.0162484	Bfsp2	phakinin [Source:RefSeq peptide;Acc:NP_001166545]
ENSCPOG00000006049	80.8909	55.2239	106.558	1.92956	0.948275	0.000789483	0.0162503	SLC43A1	solute carrier family 43, member 1 [Source:HGNC Symbol;Acc:9225]
ENSCPOG00000003169	316.727	390.406	243.048	0.622551	-0.683736	0.000801095	0.0164576
ENSCPOG00000004902	8.67411	3.31428	14.0339	4.23439	2.08215	0.000801514	0.0164576
ENSCPOG00000003297	8.41831	13.3397	3.49695	0.262146	-1.93155	0.000812138	0.0166541	NEIL3	nei endonuclease VIII-like 3 (E. coli) [Source:HGNC Symbol;Acc:24573]
ENSCPOG00000015423	364.141	217.65	510.632	2.34612	1.23028	0.000813072	0.0166541	ACADS	acyl-CoA dehydrogenase, C-2 to C-3 short chain [Source:HGNC Symbol;Acc:90]
ENSCPOG00000006860	44.2401	56.68	31.8002	0.561049	-0.833802	0.000814349	0.0166599	SLC44A3	solute carrier family 44, member 3 [Source:HGNC Symbol;Acc:28689]
ENSCPOG00000024981	17.9789	26.3862	9.5715	0.362746	-1.46297	0.000817942	0.0167114	GFRA4	GDNF family receptor alpha 4 [Source:HGNC Symbol;Acc:13821]
ENSCPOG00000021515	3.13393	0.922512	5.34534	5.79434	2.53464	0.000818865	0.0167114	CDSN	corneodesmosin [Source:HGNC Symbol;Acc:1802]
ENSCPOG00000026600	34.2957	48.5514	20.04	0.412758	-1.27663	0.000822162	0.0167583	ANKRD37	ankyrin repeat domain 37 [Source:HGNC Symbol;Acc:29593]
ENSCPOG00000024212	21.0332	8.09419	33.9722	4.19711	2.0694	0.000826529	0.01682
ENSCPOG00000020265	8.37444	13.9522	2.79668	0.200447	-2.31871	0.0008281	0.01682	HIST2H2BF	histone cluster 2, H2bf [Source:HGNC Symbol;Acc:24700]
ENSCPOG00000010146	19.0005	26.823	11.178	0.416731	-1.26281	0.000828557	0.01682	MATN1	matrilin 1, cartilage matrix protein [Source:HGNC Symbol;Acc:6907]
ENSCPOG00000007468	25.1239	33.9806	16.2671	0.478717	-1.06275	0.000829204	0.01682	PPP4R1L	protein phosphatase 4, regulatory subunit 1-like [Source:HGNC Symbol;Acc:15755]
ENSCPOG00000021689	51.5404	11.9035	91.1773	7.65971	2.93729	0.000831597	0.0168481	SGCA	sarcoglycan, alpha (50kDa dystrophin-associated glycoprotein) [Source:HGNC Symbol;Acc:10805]
ENSCPOG00000014597	52.9394	34.6552	71.2236	2.05521	1.03928	0.000834889	0.0168944	ANXA1	annexin A1 [Source:HGNC Symbol;Acc:533]
ENSCPOG00000026308	240.555	178.046	303.063	1.70216	0.767366	0.00083771	0.016931
ENSCPOG00000024344	1.78704	0.2266	3.34747	14.7726	3.88486	0.000842759	0.0170126	NXNL2	nucleoredoxin-like 2 [Source:HGNC Symbol;Acc:30482]
ENSCPOG00000005401	65.213	81.6028	48.8231	0.598302	-0.741053	0.00084392	0.0170155	USP50	ubiquitin specific peptidase 50 [Source:HGNC Symbol;Acc:20079]
ENSCPOG00000014059	114.511	82.2033	146.819	1.78604	0.836765	0.000845609	0.0170291	SMPDL3A	sphingomyelin phosphodiesterase, acid-like 3A [Source:HGNC Symbol;Acc:17389]
ENSCPOG00000008298	66.9316	89.5052	44.3581	0.495593	-1.01277	0.000852348	0.0171442	RAB11FIP1	RAB11 family interacting protein 1 (class I) [Source:HGNC Symbol;Acc:30265]
ENSCPOG00000000675	20.8759	13.0604	28.6914	2.19682	1.13542	0.000859228	0.017249	KERA	keratocan [Source:HGNC Symbol;Acc:6309]
ENSCPOG00000009141	37.9512	25.2741	50.6283	2.00317	1.00228	0.000859619	0.017249	FAIM3	Fas apoptotic inhibitory molecule 3 [Source:HGNC Symbol;Acc:14315]
ENSCPOG00000014844	188.495	230.931	146.06	0.632485	-0.660896	0.000861264	0.0172613	SNUPN	snurportin 1 [Source:HGNC Symbol;Acc:14245]
ENSCPOG00000022099	322.246	207.618	436.874	2.10422	1.07329	0.000865542	0.0173263	MAD2L2	MAD2 mitotic arrest deficient-like 2 (yeast) [Source:HGNC Symbol;Acc:6764]
ENSCPOG00000012441	2394.93	1201.53	3588.32	2.98646	1.57844	0.000867787	0.0173506
ENSCPOG00000008321	20.5084	1.65012	39.3666	23.8569	4.57633	0.000869717	0.0173632	ANXA10	annexin A10 [Source:HGNC Symbol;Acc:534]
ENSCPOG00000002134	710.168	514.344	905.993	1.76146	0.816768	0.000870491	0.0173632	RBP4	retinol binding protein 4, plasma [Source:HGNC Symbol;Acc:9922]
ENSCPOG00000004188	257.321	190.056	324.585	1.70784	0.772171	0.000873924	0.0174109	ACOT9	acyl-CoA thioesterase 9 [Source:HGNC Symbol;Acc:17152]
ENSCPOG00000008784	444.597	561.724	327.47	0.582974	-0.778498	0.000875046	0.0174126	RPL21	ribosomal protein L21 [Source:HGNC Symbol;Acc:10313]
ENSCPOG00000020448	166.428	118.958	213.899	1.79811	0.846481	0.000876431	0.0174195	SLC29A4	solute carrier family 29 (nucleoside transporters), member 4 [Source:HGNC Symbol;Acc:23097]
ENSCPOG00000008026	58.034	73.877	42.1911	0.571099	-0.808188	0.000879109	0.017452	FLT4	fms-related tyrosine kinase 4 [Source:HGNC Symbol;Acc:3767]
ENSCPOG00000000215	183.57	231.728	135.412	0.584356	-0.77508	0.000884879	0.0175457	AASDH	aminoadipate-semialdehyde dehydrogenase [Source:HGNC Symbol;Acc:23993]
ENSCPOG00000022534	160.319	206.52	114.118	0.552577	-0.855753	0.000886993	0.0175559
ENSCPOG00000005775	264.876	329.502	200.251	0.607738	-0.718479	0.000887485	0.0175559
ENSCPOG00000005878	12.4777	5.99495	18.9604	3.16272	1.66117	0.0008952	0.0176876	SI	sucrase-isomaltase (alpha-glucosidase) [Source:HGNC Symbol;Acc:10856]
ENSCPOG00000008156	379.969	308.164	451.774	1.46602	0.551902	0.000902493	0.0178107	HDHD2	haloacid dehalogenase-like hydrolase domain containing 2 [Source:HGNC Symbol;Acc:25364]
ENSCPOG00000008646	24.4614	33.1629	15.7599	0.475228	-1.07331	0.000910053	0.0179387	LSP1	lymphocyte-specific protein 1 [Source:HGNC Symbol;Acc:6707]
ENSCPOG00000013912	16.3766	26.6355	6.11763	0.22968	-2.12231	0.000913723	0.0179899	FMO3	flavin containing monooxygenase 3 [Source:HGNC Symbol;Acc:3771]
ENSCPOG00000008610	587.869	711.531	464.207	0.652406	-0.616157	0.000923579	0.0181626	SLC20A2	solute carrier family 20 (phosphate transporter), member 2 [Source:HGNC Symbol;Acc:10947]
ENSCPOG00000011402	3.63115	6.2323	1.03001	0.16527	-2.5971	0.000930257	0.0182725	MEP1A	meprin A, alpha (PABA peptide hydrolase) [Source:HGNC Symbol;Acc:7015]
ENSCPOG00000008018	72.2493	14.2188	130.28	9.16247	3.19574	0.000940084	0.0184439	MYOM3	myomesin family, member 3 [Source:HGNC Symbol;Acc:26679]
ENSCPOG00000000847	228.588	280.117	177.06	0.632092	-0.661794	0.000944848	0.0185157	GRB14	growth factor receptor-bound protein 14 [Source:HGNC Symbol;Acc:4565]
ENSCPOG00000019269	2522.03	1926.36	3117.71	1.61844	0.694608	0.000946232	0.0185212	CPNE5	copine V [Source:HGNC Symbol;Acc:2318]
ENSCPOG00000013206	73.5402	41.3142	105.766	2.56004	1.35617	0.000949668	0.0185659	CENPM	centromere protein M [Source:HGNC Symbol;Acc:18352]
ENSCPOG00000020615	55.8617	73.1882	38.5353	0.526523	-0.925432	0.000950732	0.0185659	SH3PXD2B	SH3 and PX domains 2B [Source:HGNC Symbol;Acc:29242]
ENSCPOG00000024335	34.6603	48.3297	20.991	0.434329	-1.20314	0.000952204	0.018573	EFCAB2	EF-hand calcium binding domain 2 [Source:HGNC Symbol;Acc:28166]
ENSCPOG00000009144	1276.42	1574.37	978.463	0.621494	-0.686188	0.000954595	0.0185979	SYNJ2	synaptojanin 2 [Source:HGNC Symbol;Acc:11504]
ENSCPOG00000020589	989.382	773.624	1205.14	1.55778	0.639496	0.000960483	0.0186909	PNKD	paroxysmal nonkinesigenic dyskinesia [Source:HGNC Symbol;Acc:9153]
ENSCPOG00000014538	522.875	407.949	637.801	1.56343	0.644718	0.000968068	0.0188048	JMJD4	jumonji domain containing 4 [Source:HGNC Symbol;Acc:25724]
ENSCPOG00000023861	118.389	151.596	85.181	0.561893	-0.831633	0.000968746	0.0188048	CEP97	centrosomal protein 97kDa [Source:HGNC Symbol;Acc:26244]
ENSCPOG00000012709	1.5512	0.161327	2.94108	18.2306	4.18829	0.0009697	0.0188048	FAM167B	family with sequence similarity 167, member B [Source:HGNC Symbol;Acc:28133]
ENSCPOG00000007613	249.707	311.607	187.806	0.602703	-0.730481	0.000976095	0.0189069	SLC9A2	solute carrier family 9, subfamily A (NHE2, cation proton antiporter 2), member 2 [Source:HGNC Symbol;Acc:11072]
ENSCPOG00000013779	41.158	25.1436	57.1724	2.27383	1.18513	0.000978559	0.0189327	C7orf31	chromosome 7 open reading frame 31 [Source:HGNC Symbol;Acc:21722]
ENSCPOG00000020861	966.833	696.906	1236.76	1.77464	0.827529	0.000984101	0.019018	MVD	mevalonate (diphospho) decarboxylase [Source:HGNC Symbol;Acc:7529]
ENSCPOG00000010323	602.74	458.082	747.398	1.63158	0.70627	0.000986062	0.019034	KRI1	KRI1 homolog (S. cerevisiae) [Source:HGNC Symbol;Acc:25769]
ENSCPOG00000003533	58.7583	80.1727	37.3439	0.465794	-1.10224	0.000989519	0.0190787
ENSCPOG00000027299	39.6871	24.7497	54.6245	2.20708	1.14214	0.000997567	0.0192118	PIH1D2	PIH1 domain containing 2 [Source:HGNC Symbol;Acc:25210]
ENSCPOG00000019767	192.427	120.235	264.618	2.20084	1.13805	0.00100554	0.0193431	MXRA7	matrix-remodelling associated 7 [Source:HGNC Symbol;Acc:7541]
ENSCPOG00000024218	113.546	35.6325	191.46	5.3732	2.42578	0.00101401	0.0194836	PGLYRP2	peptidoglycan recognition protein 2 [Source:HGNC Symbol;Acc:30013]
ENSCPOG00000001274	372.916	286.312	459.52	1.60496	0.682539	0.00102383	0.0196498	ITPA	inosine triphosphatase (nucleoside triphosphate pyrophosphatase) [Source:HGNC Symbol;Acc:6176]
ENSCPOG00000006341	422.75	332.634	512.865	1.54183	0.624644	0.00102585	0.019666	LINGO3	leucine rich repeat and Ig domain containing 3 [Source:HGNC Symbol;Acc:21206]
ENSCPOG00000005651	714.621	489.224	940.017	1.92145	0.942193	0.00103279	0.0197764	COL9A1	collagen, type IX, alpha 1 [Source:HGNC Symbol;Acc:2217]
ENSCPOG00000022770	150.593	99.3179	201.867	2.03254	1.02328	0.0010508	0.0200983	PRR3	proline rich 3 [Source:HGNC Symbol;Acc:21149]
ENSCPOG00000028923	27.7064	15.2423	40.1706	2.63546	1.39806	0.00105683	0.0201878	snoU90	Small nucleolar RNA U90 [Source:RFAM;Acc:RF01295]
ENSCPOG00000009697	105.189	138.123	72.2545	0.523116	-0.934797	0.00105789	0.0201878	CHRNA6	cholinergic receptor, nicotinic, alpha 6 (neuronal) [Source:HGNC Symbol;Acc:15963]
ENSCPOG00000008445	8.90671	3.7104	14.103	3.80095	1.92636	0.00105959	0.0201972	CPA2	carboxypeptidase A2 (pancreatic) [Source:HGNC Symbol;Acc:2297]
ENSCPOG00000019280	7.95082	3.5509	12.3507	3.4782	1.79834	0.0010712	0.0203732
ENSCPOG00000026988	129.424	160.137	98.712	0.616424	-0.698006	0.00107125	0.0203732	TAP1	transporter 1, ATP-binding cassette, sub-family B (MDR/TAP) [Source:HGNC Symbol;Acc:43]
ENSCPOG00000026926	154.811	120.255	189.367	1.57471	0.655087	0.00107345	0.020392	ZIC2	Zic family member 2 [Source:HGNC Symbol;Acc:12873]
ENSCPOG00000003074	73.5519	96.3962	50.7076	0.526034	-0.926773	0.0010768	0.0204323
ENSCPOG00000005397	102.973	133.88	72.0653	0.538281	-0.893568	0.00108147	0.0204814	SPATA5	spermatogenesis associated 5 [Source:HGNC Symbol;Acc:18119]
ENSCPOG00000012225	7.95051	3.44891	12.4521	3.61045	1.85218	0.00108183	0.0204814
ENSCPOG00000022556	5.49633	1.46215	9.53052	6.51816	2.70446	0.00108427	0.0204837	RGR	retinal G protein coupled receptor [Source:HGNC Symbol;Acc:9990]
ENSCPOG00000025531	9.81054	14.5217	5.09941	0.351159	-1.5098	0.00108439	0.0204837
ENSCPOG00000019881	97.0638	67.9819	126.146	1.85558	0.891869	0.00108787	0.0205262	ANKRD33B	ankyrin repeat domain 33B [Source:HGNC Symbol;Acc:35240]
ENSCPOG00000003004	118.554	149.57	87.5374	0.585259	-0.772853	0.00110538	0.0208331	AP5M1	adaptor-related protein complex 5, mu 1 subunit [Source:HGNC Symbol;Acc:20192]
ENSCPOG00000012907	216.44	257.536	175.344	0.680855	-0.554581	0.00112644	0.0212062	P2RX6	purinergic receptor P2X, ligand-gated ion channel, 6 [Source:HGNC Symbol;Acc:8538]
ENSCPOG00000024727	2.7533	4.91113	0.595462	0.121248	-3.04397	0.00112911	0.0212325	CATSPERB	catsper channel auxiliary subunit beta [Source:HGNC Symbol;Acc:20500]
ENSCPOG00000023255	1106.25	1330.19	882.313	0.663299	-0.59227	0.00113051	0.021235	ATP6V0E2	ATPase, H+ transporting V0 subunit e2 [Source:HGNC Symbol;Acc:21723]
ENSCPOG00000003921	21.6593	13.2006	30.1179	2.28155	1.19001	0.00114094	0.0214071	C13orf33	chromosome 13 open reading frame 33 [Source:HGNC Symbol;Acc:25926]
ENSCPOG00000026573	599.37	732.346	466.394	0.636849	-0.650977	0.00114307	0.021423	CCND2	cyclin D2 [Source:HGNC Symbol;Acc:1583]
ENSCPOG00000007893	119.599	155.7	83.498	0.536275	-0.898955	0.00114551	0.0214447	PALLD	palladin, cytoskeletal associated protein [Source:HGNC Symbol;Acc:17068]
ENSCPOG00000015607	9.90145	14.7005	5.10239	0.347089	-1.52662	0.0011511	0.0215253	OIT3	oncoprotein induced transcript 3 [Source:HGNC Symbol;Acc:29953]
ENSCPOG00000024312	51.0162	28.5417	73.4907	2.57486	1.36449	0.00115262	0.0215296	FCER2	Fc fragment of IgE, low affinity II, receptor for (CD23) [Source:HGNC Symbol;Acc:3612]
ENSCPOG00000011689	48.896	63.4686	34.3234	0.540794	-0.886848	0.00115499	0.0215499	SCNN1D	sodium channel, non-voltage-gated 1, delta subunit [Source:HGNC Symbol;Acc:10601]
ENSCPOG00000023105	104.251	76.1475	132.355	1.73814	0.797541	0.00115658	0.0215556	CBFA2T3	core-binding factor, runt domain, alpha subunit 2; translocated to, 3 [Source:HGNC Symbol;Acc:1537]
ENSCPOG00000007152	92.522	117.424	67.6204	0.575867	-0.796193	0.00115835	0.0215645	GLMN	glomulin, FKBP associated protein [Source:HGNC Symbol;Acc:14373]
ENSCPOG00000009378	19.3599	26.8955	11.8242	0.439634	-1.18562	0.00116702	0.021702	GBP6	guanylate binding protein family, member 6 [Source:HGNC Symbol;Acc:25395]
ENSCPOG00000004807	9.21213	3.98604	14.4382	3.6222	1.85687	0.00117729	0.0218686	DLGAP5	discs, large (Drosophila) homolog-associated protein 5 [Source:HGNC Symbol;Acc:16864]
ENSCPOG00000024590	3602.34	2378.82	4825.86	2.02868	1.02054	0.00119321	0.0221345	RUNDC3A	RUN domain containing 3A [Source:HGNC Symbol;Acc:16984]
ENSCPOG00000022082	14.815	4.86009	24.7699	5.09658	2.34953	0.00119425	0.0221345	KLK10	kallikrein-related peptidase 10 [Source:HGNC Symbol;Acc:6358]
ENSCPOG00000003165	219.878	263.754	176.003	0.667299	-0.583594	0.00120908	0.0223847	THBS3	thrombospondin 3 [Source:HGNC Symbol;Acc:11787]
ENSCPOG00000008471	318.186	199.682	436.691	2.18694	1.12891	0.00121278	0.0224283	SARS2	seryl-tRNA synthetase 2, mitochondrial [Source:HGNC Symbol;Acc:17697]
ENSCPOG00000012284	21.5517	31.2445	11.8588	0.379547	-1.39765	0.00122484	0.0226265	CTHRC1	collagen triple helix repeat containing 1 [Source:HGNC Symbol;Acc:18831]
ENSCPOG00000021853	523.676	405.512	641.84	1.58279	0.662471	0.00122961	0.0226896	VRK3	vaccinia related kinase 3 [Source:HGNC Symbol;Acc:18996]
ENSCPOG00000008726	220.514	267.587	173.441	0.648167	-0.625563	0.0012516	0.0230645	HSPB11	heat shock protein family B (small), member 11 [Source:HGNC Symbol;Acc:25019]
ENSCPOG00000017424	1808.28	1106.06	2510.49	2.26976	1.18254	0.00125268	0.0230645	Q9TEG3_CAVPO	NADH dehydrogenase subunit 4L [Source:RefSeq peptide;Acc:NP_008759]
ENSCPOG00000004714	47.744	68.5685	26.9194	0.392592	-1.3489	0.00126903	0.0233399	ANKAR	ankyrin and armadillo repeat containing [Source:HGNC Symbol;Acc:26350]
ENSCPOG00000005272	3549.3	2675.08	4423.52	1.6536	0.725613	0.00127564	0.0234247	ANXA6	annexin A6 [Source:HGNC Symbol;Acc:544]
ENSCPOG00000023897	12.2444	4.48529	20.0034	4.45979	2.15698	0.00127644	0.0234247	Q6W8W8_CAVPO	T-cell surface glycoprotein CD8 alpha chain [Source:RefSeq peptide;Acc:NP_001166347]
ENSCPOG00000001087	329.124	255.525	402.723	1.57606	0.656324	0.00128656	0.0235845	MLYCD	malonyl-CoA decarboxylase [Source:HGNC Symbol;Acc:7150]
ENSCPOG00000011925	55.7723	37.6078	73.9367	1.96599	0.975258	0.00131079	0.0239835	ACCS	1-aminocyclopropane-1-carboxylate synthase homolog (Arabidopsis)(non-functional) [Source:HGNC Symbol;Acc:23989]
ENSCPOG00000012572	55.7727	72.0021	39.5433	0.549196	-0.864608	0.00131118	0.0239835	CHRNA3	cholinergic receptor, nicotinic, alpha 3 (neuronal) [Source:HGNC Symbol;Acc:1957]
ENSCPOG00000025587	68.5851	85.1195	52.0507	0.611501	-0.709573	0.00133083	0.0243164	TULP2	tubby like protein 2 [Source:HGNC Symbol;Acc:12424]
ENSCPOG00000001277	85.8059	43.4458	128.166	2.95002	1.56073	0.0013335	0.0243386	SLC4A11	solute carrier family 4, sodium borate transporter, member 11 [Source:HGNC Symbol;Acc:16438]
ENSCPOG00000007792	46.6333	62.9233	30.3433	0.482227	-1.05222	0.00134149	0.0244578	CD44	CD44 molecule (Indian blood group) [Source:HGNC Symbol;Acc:1681]
ENSCPOG00000008127	4.77396	1.37112	8.17681	5.9636	2.57618	0.00134972	0.0245811	RBP5	retinol binding protein 5, cellular [Source:HGNC Symbol;Acc:15847]
ENSCPOG00000006373	1.07021	2.14042	0	0	#NAME?	0.00137488	0.0250121	OR13J1	olfactory receptor, family 13, subfamily J, member 1 [Source:HGNC Symbol;Acc:15108]
ENSCPOG00000008615	951.132	713.48	1188.78	1.66618	0.736541	0.00138438	0.0251575	DDX39A	DEAD (Asp-Glu-Ala-Asp) box polypeptide 39A [Source:HGNC Symbol;Acc:17821]
ENSCPOG00000011866	797.571	506.451	1088.69	2.14965	1.1041	0.0013981	0.0253793	MRPL37	mitochondrial ribosomal protein L37 [Source:HGNC Symbol;Acc:14034]
ENSCPOG00000001400	628.83	487.06	770.6	1.58215	0.661884	0.00140681	0.0255099	LRWD1	leucine-rich repeats and WD repeat domain containing 1 [Source:HGNC Symbol;Acc:21769]
ENSCPOG00000008852	6.95015	11.2656	2.6347	0.233871	-2.09622	0.00141703	0.0256674	CCL5_CAVPO	C-C motif chemokine 5 [Source:UniProtKB/Swiss-Prot;Acc:P97272]
ENSCPOG00000007892	289.359	239.166	339.553	1.41974	0.505626	0.0014418	0.0260879	SIAE	sialic acid acetylesterase [Source:HGNC Symbol;Acc:18187]
ENSCPOG00000003296	360.093	438.894	281.291	0.640909	-0.641808	0.00145115	0.0262154	PFAS	phosphoribosylformylglycinamidine synthase [Source:HGNC Symbol;Acc:8863]
ENSCPOG00000004772	69.2217	44.7404	93.7031	2.09437	1.06652	0.00145198	0.0262154	SLC24A6	solute carrier family 24 (sodium/lithium/calcium exchanger), member 6 [Source:HGNC Symbol;Acc:26175]
ENSCPOG00000014689	937.529	764.028	1111.03	1.45417	0.540201	0.00145423	0.0262161	FAM107A	family with sequence similarity 107, member A [Source:HGNC Symbol;Acc:30827]
ENSCPOG00000011091	749.793	596.957	902.63	1.51205	0.596509	0.00145514	0.0262161	PRDX6	peroxiredoxin 6 [Source:HGNC Symbol;Acc:16753]
ENSCPOG00000012644	27.0907	17.9361	36.2454	2.02081	1.01493	0.00147107	0.0264746	PLA2G5	phospholipase A2, group V [Source:HGNC Symbol;Acc:9038]
ENSCPOG00000024336	28.8584	16.2144	41.5024	2.5596	1.35592	0.00147398	0.0264984
ENSCPOG00000023898	74.6848	41.2532	108.116	2.6208	1.39001	0.0014814	0.0266032	PHLDA3	pleckstrin homology-like domain, family A, member 3 [Source:HGNC Symbol;Acc:8934]
ENSCPOG00000004726	29.6432	39.9548	19.3315	0.483835	-1.04741	0.00149209	0.0267665	MSC	musculin [Source:HGNC Symbol;Acc:7321]
ENSCPOG00000008570	155.807	117.41	194.204	1.65406	0.726012	0.00149556	0.0268	PPIL3	peptidylprolyl isomerase (cyclophilin)-like 3 [Source:HGNC Symbol;Acc:9262]
ENSCPOG00000003835	171.889	105.335	238.443	2.26366	1.17866	0.0014997	0.0268455	CD320	CD320 molecule [Source:HGNC Symbol;Acc:16692]
ENSCPOG00000027284	153.403	103.006	203.799	1.97851	0.984414	0.00153262	0.0274057	PCGF2	polycomb group ring finger 2 [Source:HGNC Symbol;Acc:12929]
ENSCPOG00000003256	51.4604	68.1304	34.7905	0.510646	-0.969605	0.00155026	0.0276743	ACER2	alkaline ceramidase 2 [Source:HGNC Symbol;Acc:23675]
ENSCPOG00000002197	108.635	131.475	85.7942	0.65255	-0.61584	0.00155095	0.0276743	PHF11	PHD finger protein 11 [Source:HGNC Symbol;Acc:17024]
ENSCPOG00000007997	51.3591	71.0131	31.7051	0.446468	-1.16337	0.00155391	0.0276976
ENSCPOG00000014449	40.2347	53.4705	26.9989	0.504931	-0.985841	0.00156333	0.0278358	FHAD1	forkhead-associated (FHA) phosphopeptide binding domain 1 [Source:HGNC Symbol;Acc:29408]
ENSCPOG00000014265	52.1038	34.3191	69.8884	2.03643	1.02604	0.00157729	0.0280546	YIPF7	Yip1 domain family, member 7 [Source:HGNC Symbol;Acc:26825]
ENSCPOG00000023859	5.50297	2.05388	8.95207	4.3586	2.12387	0.00159159	0.028279
ENSCPOG00000022786	2.14049	3.8417	0.439287	0.114347	-3.12851	0.00159616	0.0283302	CD247	CD247 molecule [Source:HGNC Symbol;Acc:1677]
ENSCPOG00000007003	57.9855	42.882	73.089	1.70442	0.769281	0.00160233	0.0284096	TLL1	tolloid-like 1 [Source:HGNC Symbol;Acc:11843]
ENSCPOG00000008420	154.561	199.426	109.697	0.550062	-0.862334	0.00161296	0.0285408	DDX59	DEAD (Asp-Glu-Ala-Asp) box polypeptide 59 [Source:HGNC Symbol;Acc:25360]
ENSCPOG00000012756	19.6199	27.6763	11.5635	0.417814	-1.25907	0.00161314	0.0285408	CDC7	cell division cycle 7 homolog (S. cerevisiae) [Source:HGNC Symbol;Acc:1745]
ENSCPOG00000020706	46.8562	29.7993	63.9131	2.14478	1.10083	0.00161917	0.0286173	C15orf48	chromosome 15 open reading frame 48 [Source:HGNC Symbol;Acc:29898]
ENSCPOG00000009373	132.001	163.48	100.522	0.61489	-0.701601	0.00162523	0.028694	NIPSNAP3A	nipsnap homolog 3A (C. elegans) [Source:HGNC Symbol;Acc:23619]
ENSCPOG00000007568	91.2605	57.8179	124.703	2.15682	1.10891	0.00162945	0.0287384	CD109	CD109 molecule [Source:HGNC Symbol;Acc:21685]
ENSCPOG00000000556	72.6083	94.4508	50.7657	0.537483	-0.895708	0.00164277	0.0289427
ENSCPOG00000005611	33.657	11.0973	56.2167	5.06579	2.34079	0.00164647	0.0289776	S100A5	S100 calcium binding protein A5 [Source:HGNC Symbol;Acc:10495]
ENSCPOG00000016510	2.67181	4.5843	0.759323	0.165635	-2.59392	0.00164908	0.0289931	U6	U6 spliceosomal RNA [Source:RFAM;Acc:RF00026]
ENSCPOG00000023775	85.6258	62.6641	108.588	1.73285	0.793147	0.00165658	0.0290671	GDF9	growth differentiation factor 9 [Source:HGNC Symbol;Acc:4224]
ENSCPOG00000024764	1.55399	0.2266	2.88138	12.7157	3.66854	0.00165676	0.0290671	IL22RA1	interleukin 22 receptor, alpha 1 [Source:HGNC Symbol;Acc:13700]
ENSCPOG00000019712	298.016	237.658	358.374	1.50794	0.592578	0.00166332	0.0291222	POU6F1	POU class 6 homeobox 1 [Source:HGNC Symbol;Acc:9224]
ENSCPOG00000010010	585.07	717.514	452.627	0.630826	-0.664685	0.00166338	0.0291222
ENSCPOG00000009939	3.66078	6.28065	1.04091	0.165732	-2.59307	0.00166787	0.0291703	CALCB	calcitonin-related polypeptide beta [Source:HGNC Symbol;Acc:1438]
ENSCPOG00000023259	13.286	20.1348	6.43725	0.319709	-1.64517	0.00167026	0.0291817
ENSCPOG00000011347	221.629	273.832	169.426	0.618721	-0.692638	0.00168639	0.029417	CPOX	coproporphyrinogen oxidase [Source:HGNC Symbol;Acc:2321]
ENSCPOG00000007487	79.2626	55.4784	103.047	1.85742	0.893301	0.00168724	0.029417	MFSD7	major facilitator superfamily domain containing 7 [Source:HGNC Symbol;Acc:26177]
ENSCPOG00000021363	1.23404	0.101206	2.36688	23.3867	4.54762	0.00171055	0.0297924	Y_RNA	Y RNA [Source:RFAM;Acc:RF00019]
ENSCPOG00000012798	233.949	278.487	189.411	0.680143	-0.556089	0.00171275	0.0297996	C11orf74	chromosome 11 open reading frame 74 [Source:HGNC Symbol;Acc:25142]
ENSCPOG00000025777	848.108	672.276	1023.94	1.5231	0.607006	0.00172281	0.0299235	SHISA7	shisa homolog 7 (Xenopus laevis) [Source:HGNC Symbol;Acc:35409]
ENSCPOG00000018365	5.39925	9.12168	1.67682	0.183828	-2.44358	0.00172343	0.0299235	SNORA52	Small nucleolar RNA SNORA52 [Source:RFAM;Acc:RF00419]
ENSCPOG00000013403	525.241	670.345	380.138	0.567078	-0.818381	0.00173235	0.0300471	SLC17A6	solute carrier family 17 (sodium-dependent inorganic phosphate cotransporter), member 6 [Source:HGNC Symbol;Acc:16703]
ENSCPOG00000004890	671.167	825.838	516.497	0.625422	-0.677098	0.00173723	0.0301006	KCNAB1	potassium voltage-gated channel, shaker-related subfamily, beta member 1 [Source:HGNC Symbol;Acc:6228]
ENSCPOG00000013741	99.942	63.7594	136.125	2.13497	1.09422	0.00174151	0.0301436	SLC6A12	solute carrier family 6 (neurotransmitter transporter, betaine/GABA), member 12 [Source:HGNC Symbol;Acc:11045]
ENSCPOG00000005674	46.2074	31.3487	61.066	1.94796	0.961962	0.00174532	0.0301646	MURC	muscle-related coiled-coil protein [Source:HGNC Symbol;Acc:33742]
ENSCPOG00000024634	231.214	159.095	303.333	1.90661	0.93101	0.00174633	0.0301646	HYAL3	hyaluronoglucosaminidase 3 [Source:HGNC Symbol;Acc:5322]
ENSCPOG00000014672	472.793	575.171	370.414	0.644007	-0.634851	0.00177218	0.0305796	PARP4	poly (ADP-ribose) polymerase family, member 4 [Source:HGNC Symbol;Acc:271]
ENSCPOG00000010496	202.152	163.029	241.275	1.47995	0.565551	0.00178356	0.0307443	ITIH5	inter-alpha-trypsin inhibitor heavy chain family, member 5 [Source:HGNC Symbol;Acc:21449]
ENSCPOG00000002616	2.69169	4.94267	0.440709	0.0891641	-3.48739	0.00179169	0.0308365
ENSCPOG00000001447	285.11	191.481	378.738	1.97794	0.984	0.00179259	0.0308365	PROCA1	protein interacting with cyclin A1 [Source:HGNC Symbol;Acc:28600]
ENSCPOG00000020753	997.96	629.171	1366.75	2.1723	1.11922	0.00179457	0.030839	POLD2	polymerase (DNA directed), delta 2, regulatory subunit 50kDa [Source:HGNC Symbol;Acc:9176]
ENSCPOG00000024034	2.40309	4.31927	0.486907	0.112729	-3.14907	0.00181164	0.0311004	SNORA2	Small nucleolar RNA SNORA2/SNORA34 family [Source:RFAM;Acc:RF00410]
ENSCPOG00000023418	1055.14	1246.16	864.117	0.693425	-0.528188	0.00182263	0.0312571	SLC7A4	solute carrier family 7 (orphan transporter), member 4 [Source:HGNC Symbol;Acc:11062]
ENSCPOG00000020997	608.392	494.156	722.629	1.46235	0.548289	0.00183474	0.0314325	RIN1	Ras and Rab interactor 1 [Source:HGNC Symbol;Acc:18749]
ENSCPOG00000005506	17.9675	9.42533	26.5096	2.81259	1.4919	0.00186653	0.0319446	DSC2	desmocollin 2 [Source:HGNC Symbol;Acc:3036]
ENSCPOG00000026464	183.747	258.57	108.924	0.421257	-1.24723	0.00187403	0.0320402
ENSCPOG00000004112	297.128	219.28	374.976	1.71004	0.774027	0.00187791	0.0320636	PSMG3	proteasome (prosome, macropain) assembly chaperone 3 [Source:HGNC Symbol;Acc:22420]
ENSCPOG00000006588	235.125	281.359	188.892	0.671354	-0.574853	0.00187923	0.0320636	GREB1	growth regulation by estrogen in breast cancer 1 [Source:HGNC Symbol;Acc:24885]
ENSCPOG00000023336	94.8473	118.471	71.224	0.601196	-0.734093	0.00188995	0.0322137	C17orf80	chromosome 17 open reading frame 80 [Source:HGNC Symbol;Acc:29601]
ENSCPOG00000015334	8.5352	3.62295	13.4474	3.71173	1.89209	0.00189945	0.0323428
ENSCPOG00000001990	75.7436	54.7424	96.7448	1.76727	0.821524	0.00192273	0.032706	C9orf64	chromosome 9 open reading frame 64 [Source:HGNC Symbol;Acc:28144]
ENSCPOG00000002891	309.038	216.082	401.994	1.86038	0.895597	0.00192903	0.0327671	PXMP2	peroxisomal membrane protein 2, 22kDa [Source:HGNC Symbol;Acc:9716]
ENSCPOG00000012354	18.3311	9.55859	27.1036	2.83552	1.50361	0.00193113	0.0327671	SYTL1	synaptotagmin-like 1 [Source:HGNC Symbol;Acc:15584]
ENSCPOG00000003058	75.7929	55.3055	96.2803	1.74088	0.799816	0.00193219	0.0327671	SNAPC5	small nuclear RNA activating complex, polypeptide 5, 19kDa [Source:HGNC Symbol;Acc:15484]
ENSCPOG00000014120	14.4146	7.22761	21.6016	2.98877	1.57955	0.00193651	0.032807
ENSCPOG00000003258	197.627	258.723	136.53	0.527708	-0.922187	0.00194114	0.0328523	GNB4	guanine nucleotide binding protein (G protein), beta polypeptide 4 [Source:HGNC Symbol;Acc:20731]
ENSCPOG00000010664	183.897	138.508	229.287	1.6554	0.727184	0.0019445	0.032876	PCDH20	protocadherin 20 [Source:HGNC Symbol;Acc:14257]
ENSCPOG00000006815	664.901	835.437	494.365	0.591744	-0.756954	0.00195143	0.03296	LTN1	listerin E3 ubiquitin protein ligase 1 [Source:HGNC Symbol;Acc:13082]
ENSCPOG00000001477	490.994	579.791	402.196	0.693691	-0.527635	0.00195989	0.0330471	UTP18	UTP18 small subunit (SSU) processome component homolog (yeast) [Source:HGNC Symbol;Acc:24274]
ENSCPOG00000000441	29.3217	19.8461	38.7973	1.95491	0.967103	0.00196054	0.0330471	ZSWIM2	zinc finger, SWIM-type containing 2 [Source:HGNC Symbol;Acc:30990]
ENSCPOG00000000220	141.754	107.389	176.119	1.64001	0.713706	0.00197182	0.0332038	ARL9	ADP-ribosylation factor-like 9 [Source:HGNC Symbol;Acc:23592]
ENSCPOG00000015129	1954.95	1535.69	2374.22	1.54603	0.628571	0.00197409	0.0332087	MED24	mediator complex subunit 24 [Source:HGNC Symbol;Acc:22963]
ENSCPOG00000014592	378.925	456.812	301.038	0.658998	-0.601655	0.00197875	0.0332537
ENSCPOG00000020985	2.65044	4.54156	0.759323	0.167194	-2.5804	0.00198527	0.0333299
ENSCPOG00000007979	17.8246	6.94034	28.7089	4.13653	2.04842	0.0020006	0.0335537	SLC14A1	solute carrier family 14 (urea transporter), member 1 (Kidd blood group) [Source:HGNC Symbol;Acc:10918]
ENSCPOG00000027510	1.55684	2.95277	0.16091	0.0544947	-4.19774	0.00201266	0.0337221
ENSCPOG00000014607	3.66187	6.16573	1.15801	0.187814	-2.41262	0.00202565	0.0339059	MYB	v-myb myeloblastosis viral oncogene homolog (avian) [Source:HGNC Symbol;Acc:7545]
ENSCPOG00000011137	4.98189	1.2394	8.72438	7.0392	2.81541	0.00203209	0.0339797	WDR72	WD repeat domain 72 [Source:HGNC Symbol;Acc:26790]
ENSCPOG00000006492	49.7992	64.1088	35.4897	0.553586	-0.85312	0.00204849	0.0342198
ENSCPOG00000002221	58.1734	36.9749	79.3719	2.14664	1.10208	0.00205603	0.0343116	PLD5	phospholipase D family, member 5 [Source:HGNC Symbol;Acc:26879]
ENSCPOG00000009829	45.1671	29.2033	61.1309	2.09329	1.06577	0.00206471	0.0344221	FAM110A	family with sequence similarity 110, member A [Source:HGNC Symbol;Acc:16188]
ENSCPOG00000001627	334.718	408.774	260.661	0.637665	-0.649129	0.00208001	0.0346196	ASB13	ankyrin repeat and SOCS box containing 13 [Source:HGNC Symbol;Acc:19765]
ENSCPOG00000011524	418.341	505.084	331.598	0.656521	-0.607088	0.00208102	0.0346196	COL9A2	collagen, type IX, alpha 2 [Source:HGNC Symbol;Acc:2218]
ENSCPOG00000009940	11.4014	16.6916	6.11129	0.36613	-1.44957	0.00208458	0.0346196	PMEL	premelanosome protein [Source:HGNC Symbol;Acc:10880]
ENSCPOG00000022781	81.4327	99.9649	62.9006	0.629227	-0.668347	0.00208482	0.0346196
ENSCPOG00000025056	71.6562	90.9288	52.3836	0.576094	-0.795623	0.00209274	0.0347167
ENSCPOG00000024959	24.0789	14.4197	33.7381	2.33971	1.22633	0.00209981	0.0347996	MALL	mal, T-cell differentiation protein-like [Source:HGNC Symbol;Acc:6818]
ENSCPOG00000024352	411.798	321.32	502.277	1.56317	0.644472	0.00211372	0.0349954	EEFSEC	eukaryotic elongation factor, selenocysteine-tRNA-specific [Source:HGNC Symbol;Acc:24614]
ENSCPOG00000019473	3.96328	6.66183	1.26473	0.189847	-2.39709	0.00212728	0.0351852
ENSCPOG00000013201	158.611	117.238	199.983	1.70579	0.770436	0.0021334	0.0352515	RPUSD2	RNA pseudouridylate synthase domain containing 2 [Source:HGNC Symbol;Acc:24180]
ENSCPOG00000026979	11.9145	6.14327	17.6856	2.87886	1.5255	0.00213886	0.0352635	C11orf93	chromosome 11 open reading frame 93 [Source:HGNC Symbol;Acc:26978]
ENSCPOG00000008965	72.5552	54.0613	91.0492	1.68419	0.752051	0.00213959	0.0352635	THSD4	thrombospondin, type I, domain containing 4 [Source:HGNC Symbol;Acc:25835]
ENSCPOG00000017428	3.82176	0.927106	6.71641	7.24449	2.85688	0.00214043	0.0352635
ENSCPOG00000012263	32.6799	45.8326	19.5272	0.426056	-1.23089	0.00214746	0.0353444	XRCC2	X-ray repair complementing defective repair in Chinese hamster cells 2 [Source:HGNC Symbol;Acc:12829]
ENSCPOG00000002337	148.083	115.603	180.563	1.56192	0.643321	0.00215279	0.0353975	ADAL	adenosine deaminase-like [Source:HGNC Symbol;Acc:31853]
ENSCPOG00000009775	59.5021	36.6777	82.3265	2.24459	1.16645	0.00215837	0.0354544	BAIAP2L2	BAI1-associated protein 2-like 2 [Source:HGNC Symbol;Acc:26203]
ENSCPOG00000020502	139.935	173.563	106.307	0.612496	-0.707228	0.00216841	0.0355845	CRHR2	corticotropin releasing hormone receptor 2 [Source:HGNC Symbol;Acc:2358]
ENSCPOG00000024655	50.1826	30.793	69.5722	2.25935	1.17591	0.00217543	0.0356647	KIF19	kinesin family member 19 [Source:HGNC Symbol;Acc:26735]
ENSCPOG00000010299	17.0251	10.0477	24.0025	2.38886	1.25632	0.00218649	0.0358109	ITK	IL2-inducible T-cell kinase [Source:HGNC Symbol;Acc:6171]
ENSCPOG00000022922	5.55882	8.8336	2.28405	0.258563	-1.95141	0.00219357	0.0358919	TRIM63	tripartite motif containing 63, E3 ubiquitin protein ligase [Source:HGNC Symbol;Acc:16007]
ENSCPOG00000026613	3.11084	5.14196	1.07972	0.209982	-2.25166	0.0022087	0.0361042
ENSCPOG00000000527	250.138	306.097	194.179	0.634369	-0.656605	0.00221165	0.0361172	ADH5	alcohol dehydrogenase 5 (class III), chi polypeptide [Source:HGNC Symbol;Acc:253]
ENSCPOG00000001768	1310.84	1531.03	1090.66	0.712366	-0.489309	0.00221457	0.0361297	UNC45A	unc-45 homolog A (C. elegans) [Source:HGNC Symbol;Acc:30594]
ENSCPOG00000027275	5.7551	9.58216	1.92803	0.201211	-2.31322	0.00221723	0.036131	PTPRQ	protein tyrosine phosphatase, receptor type, Q [Source:HGNC Symbol;Acc:9679]
ENSCPOG00000001040	2457.8	1995.74	2919.86	1.46304	0.548973	0.00221897	0.036131	C2orf55	chromosome 2 open reading frame 55 [Source:HGNC Symbol;Acc:33454]
ENSCPOG00000006894	58.5794	79.2221	37.9367	0.478865	-1.06231	0.00222423	0.0361815	SLC19A2	solute carrier family 19 (thiamine transporter), member 2 [Source:HGNC Symbol;Acc:10938]
ENSCPOG00000008433	457.027	551.439	362.615	0.657579	-0.604763	0.00222798	0.0361816	AMZ1	archaelysin family metallopeptidase 1 [Source:HGNC Symbol;Acc:22231]
ENSCPOG00000024006	433.395	309.993	556.796	1.79616	0.844913	0.00222855	0.0361816
ENSCPOG00000022812	43.1871	54.0931	32.2812	0.596771	-0.74475	0.00223246	0.0362099	PLP2	proteolipid protein 2 (colonic epithelium-enriched) [Source:HGNC Symbol;Acc:9087]
ENSCPOG00000003253	1520.69	1233.79	1807.6	1.46508	0.550977	0.00224666	0.0364049	MAPK3	mitogen-activated protein kinase 3 [Source:HGNC Symbol;Acc:6877]
ENSCPOG00000022962	2.67724	0.712167	4.64231	6.51857	2.70456	0.00226594	0.0365698
ENSCPOG00000005535	306.939	243.74	370.137	1.51857	0.602715	0.0022674	0.0365698	CRHR1	corticotropin releasing hormone receptor 1 [Source:HGNC Symbol;Acc:2357]
ENSCPOG00000027395	22.6556	30.5347	14.7766	0.483926	-1.04714	0.00226974	0.0365698
ENSCPOG00000000714	101.24	132.945	69.5359	0.523044	-0.934996	0.00227055	0.0365698	EYA1	eyes absent homolog 1 (Drosophila) [Source:HGNC Symbol;Acc:3519]
ENSCPOG00000012120	398.54	317.157	479.923	1.5132	0.597607	0.00227101	0.0365698	PAOX	polyamine oxidase (exo-N4-amino) [Source:HGNC Symbol;Acc:20837]
ENSCPOG00000022818	85.9365	110.822	61.0513	0.550897	-0.860146	0.00227141	0.0365698	EML6	echinoderm microtubule associated protein like 6 [Source:HGNC Symbol;Acc:35412]
ENSCPOG00000011607	27.5516	18.3405	36.7627	2.00446	1.00321	0.00227211	0.0365698
ENSCPOG00000001985	135.391	104.106	166.677	1.60104	0.679009	0.00228843	0.0367972
ENSCPOG00000007674	385.214	282.426	488.002	1.7279	0.789016	0.00231286	0.0371543	CROCC	ciliary rootlet coiled-coil, rootletin [Source:HGNC Symbol;Acc:21299]
ENSCPOG00000023047	363.95	297.011	430.89	1.45076	0.536805	0.00232171	0.0372608
ENSCPOG00000020980	233.711	286.835	180.587	0.629587	-0.667523	0.00232459	0.0372712	EEF1E1	eukaryotic translation elongation factor 1 epsilon 1 [Source:HGNC Symbol;Acc:3212]
ENSCPOG00000007847	70.3291	88.082	52.5762	0.596901	-0.744437	0.00234397	0.0375461	PROM1	prominin 1 [Source:HGNC Symbol;Acc:9454]
ENSCPOG00000012430	840.411	703.411	977.411	1.38953	0.474598	0.00235595	0.037702	NQO1_CAVPO	NAD(P)H dehydrogenase [quinone] 1 [Source:UniProtKB/Swiss-Prot;Acc:Q8CHK7]
ENSCPOG00000009903	280.495	198.183	362.808	1.83067	0.872373	0.00237908	0.0380092	TJAP1	tight junction associated protein 1 (peripheral) [Source:HGNC Symbol;Acc:17949]
ENSCPOG00000010738	72.2431	53.7748	90.7114	1.68688	0.754354	0.00237969	0.0380092	CREG1	cellular repressor of E1A-stimulated genes 1 [Source:HGNC Symbol;Acc:2351]
ENSCPOG00000008096	141.759	179.342	104.175	0.580874	-0.783702	0.00239272	0.038181	PIGL	phosphatidylinositol glycan anchor biosynthesis, class L [Source:HGNC Symbol;Acc:8966]
ENSCPOG00000007205	28.2979	36.35	20.2457	0.556967	-0.844337	0.00239755	0.0382216	SIGLEC1	sialic acid binding Ig-like lectin 1, sialoadhesin [Source:HGNC Symbol;Acc:11127]
ENSCPOG00000007115	2280.44	2741	1819.89	0.663952	-0.590849	0.00243978	0.0388344	HMGCS1	3-hydroxy-3-methylglutaryl-CoA synthase 1 (soluble) [Source:HGNC Symbol;Acc:5007]
ENSCPOG00000006708	348.551	280.021	417.08	1.48946	0.574789	0.00244062	0.0388344	TBCK	TBC1 domain containing kinase [Source:HGNC Symbol;Acc:28261]
ENSCPOG00000003706	621.681	486.757	756.606	1.55438	0.636339	0.00244436	0.038857
ENSCPOG00000024264	146.66	93.9993	199.322	2.12046	1.08438	0.0024483	0.0388826	SPATA20	spermatogenesis associated 20 [Source:HGNC Symbol;Acc:26125]
ENSCPOG00000023458	1176.71	952.753	1400.67	1.47013	0.555946	0.00245889	0.039014	ANXA11	annexin A11 [Source:HGNC Symbol;Acc:535]
ENSCPOG00000005900	180.696	241.438	119.954	0.496834	-1.00916	0.00246779	0.0390986	ZFP57	zinc finger protein 57 homolog (mouse) [Source:HGNC Symbol;Acc:18791]
ENSCPOG00000026730	126.865	86.0854	167.644	1.94742	0.961563	0.00246889	0.0390986
ENSCPOG00000008873	187.167	226.91	147.424	0.649702	-0.62215	0.0024774	0.0391831	ATP13A5	ATPase type 13A5 [Source:HGNC Symbol;Acc:31789]
ENSCPOG00000021178	13.2	19.9122	6.48775	0.325819	-1.61786	0.00248241	0.0391831	P2RY11	purinergic receptor P2Y, G-protein coupled, 11 [Source:HGNC Symbol;Acc:8540]
ENSCPOG00000013345	129.483	93.5077	165.458	1.76945	0.823305	0.00248244	0.0391831	DLL3	delta-like 3 (Drosophila) [Source:HGNC Symbol;Acc:2909]
ENSCPOG00000026743	198.881	246.992	150.77	0.610426	-0.712111	0.00248358	0.0391831
ENSCPOG00000008252	69.104	47.6748	90.5331	1.89897	0.925217	0.00248753	0.0392085	MKX	mohawk homeobox [Source:HGNC Symbol;Acc:23729]
ENSCPOG00000005563	49.4651	34.0662	64.864	1.90405	0.929075	0.00249284	0.0392552	CENPO	centromere protein O [Source:HGNC Symbol;Acc:28152]
ENSCPOG00000000869	156.088	198.501	113.675	0.572669	-0.804225	0.00249623	0.0392717	VWA7	von Willebrand factor A domain containing 7 [Source:HGNC Symbol;Acc:13939]
ENSCPOG00000008435	581.86	477.168	686.552	1.4388	0.524871	0.00249926	0.0392824	KLHL21	kelch-like 21 (Drosophila) [Source:HGNC Symbol;Acc:29041]
ENSCPOG00000011469	70.1214	91.739	48.5038	0.528715	-0.919439	0.00250211	0.0392904	SPATA18	spermatogenesis associated 18 [Source:HGNC Symbol;Acc:29579]
ENSCPOG00000007012	9.35805	13.5465	5.16959	0.381618	-1.3898	0.002505	0.0392989	ALDH8A1	aldehyde dehydrogenase 8 family, member A1 [Source:HGNC Symbol;Acc:15471]
ENSCPOG00000009294	112.706	140.271	85.1407	0.606972	-0.720297	0.00251161	0.0393319	TTC6	tetratricopeptide repeat domain 6 [Source:HGNC Symbol;Acc:19739]
ENSCPOG00000002565	2.04211	3.6047	0.479524	0.133027	-2.9102	0.0025118	0.0393319	ANKRD1	ankyrin repeat domain 1 (cardiac muscle) [Source:HGNC Symbol;Acc:15819]
ENSCPOG00000004190	4.58011	8.28859	0.871638	0.105161	-3.24933	0.0025302	0.0395832	TDRD1	tudor domain containing 1 [Source:HGNC Symbol;Acc:11712]
ENSCPOG00000026866	14.7807	22.3361	7.22526	0.323479	-1.62826	0.00253373	0.0396013
ENSCPOG00000000327	126.818	153.095	100.54	0.656712	-0.606667	0.002537	0.0396155	CCDC164	coiled-coil domain containing 164 [Source:HGNC Symbol;Acc:24245]
ENSCPOG00000005309	55.6447	74.5624	36.7271	0.49257	-1.0216	0.00254076	0.0396373	RBM11	RNA binding motif protein 11 [Source:HGNC Symbol;Acc:9897]
ENSCPOG00000001298	9215.45	7318.6	11112.3	1.51836	0.602518	0.00254846	0.0397205	MAPK8IP1	mitogen-activated protein kinase 8 interacting protein 1 [Source:HGNC Symbol;Acc:6882]
ENSCPOG00000020899	2198.52	1576.96	2820.08	1.7883	0.83859	0.00255767	0.0398268	GFAP	glial fibrillary acidic protein [Source:HGNC Symbol;Acc:4235]
ENSCPOG00000007130	157.394	115.783	199.006	1.71879	0.781392	0.00256089	0.0398401	ANXA4	annexin A4 [Source:HGNC Symbol;Acc:542]
ENSCPOG00000008938	859.838	589.393	1130.28	1.91771	0.939383	0.00256976	0.0399409	ARMC9	armadillo repeat containing 9 [Source:HGNC Symbol;Acc:20730]
ENSCPOG00000011271	30.2697	44.1463	16.3932	0.371339	-1.42919	0.00257401	0.03997	TNFRSF11B	tumor necrosis factor receptor superfamily, member 11b [Source:HGNC Symbol;Acc:11909]
ENSCPOG00000025306	23.3775	30.1234	16.6316	0.552114	-0.856961	0.00257956	0.0400148	ALOX15	arachidonate 15-lipoxygenase [Source:HGNC Symbol;Acc:433]
ENSCPOG00000001771	21.5688	30.6684	12.4693	0.406585	-1.29837	0.00258168	0.0400148	IRAK4	interleukin-1 receptor-associated kinase 4 [Source:HGNC Symbol;Acc:17967]
ENSCPOG00000004072	30.2416	41.8918	18.5913	0.443794	-1.17204	0.00258619	0.0400258	USP44	ubiquitin specific peptidase 44 [Source:HGNC Symbol;Acc:20064]
ENSCPOG00000012300	5.42396	8.35326	2.49466	0.298645	-1.74349	0.0025901	0.0400258	ACRBP_CAVPO	Acrosin-binding protein [Source:UniProtKB/Swiss-Prot;Acc:Q60485]
ENSCPOG00000006422	68.0708	51.0096	85.132	1.66894	0.738932	0.00259281	0.0400258	NEU3	sialidase 3 (membrane sialidase) [Source:HGNC Symbol;Acc:7760]
ENSCPOG00000009819	8.74329	13.6914	3.79515	0.277191	-1.85105	0.00259366	0.0400258	ADAMTS16	ADAM metallopeptidase with thrombospondin type 1 motif, 16 [Source:HGNC Symbol;Acc:17108]
ENSCPOG00000022835	194.349	231.315	157.384	0.680388	-0.555571	0.00259433	0.0400258	CCDC24	coiled-coil domain containing 24 [Source:HGNC Symbol;Acc:28688]
ENSCPOG00000023741	245.657	195.424	295.889	1.51409	0.598449	0.00260275	0.0401188	GPANK1	G patch domain and ankyrin repeats 1 [Source:HGNC Symbol;Acc:13920]
ENSCPOG00000005947	1034.6	741.607	1327.59	1.79016	0.840085	0.00260538	0.0401223	TEX264	testis expressed 264 [Source:HGNC Symbol;Acc:30247]
ENSCPOG00000006947	128.616	158.972	98.2608	0.618103	-0.694082	0.0026131	0.0402043	FAM167A	family with sequence similarity 167, member A [Source:HGNC Symbol;Acc:15549]
ENSCPOG00000000419	631.822	741.259	522.386	0.704728	-0.504861	0.00263509	0.0404859	HINT2	histidine triad nucleotide binding protein 2 [Source:HGNC Symbol;Acc:18344]
ENSCPOG00000006606	114.504	83.3284	145.68	1.74826	0.805921	0.00263797	0.0404859	FASTKD3	FAST kinase domains 3 [Source:HGNC Symbol;Acc:28758]
ENSCPOG00000027061	79.3738	55.7633	102.984	1.84681	0.885038	0.00263865	0.0404859
ENSCPOG00000014031	586.527	705.748	467.307	0.662145	-0.594781	0.00264181	0.0404973	PODXL	podocalyxin-like [Source:HGNC Symbol;Acc:9171]
ENSCPOG00000008205	188.892	235.259	142.524	0.60582	-0.723038	0.00264675	0.0405005	LPAR1	lysophosphatidic acid receptor 1 [Source:HGNC Symbol;Acc:3166]
ENSCPOG00000007551	19112.4	13913	24311.8	1.74741	0.805217	0.00264685	0.0405005	PTGDS	prostaglandin D2 synthase 21kDa (brain) [Source:HGNC Symbol;Acc:9592]
ENSCPOG00000002626	349.139	281.004	417.273	1.48494	0.570403	0.00265416	0.0405753	GLTPD2	glycolipid transfer protein domain containing 2 [Source:HGNC Symbol;Acc:33756]
ENSCPOG00000006704	246.355	289.665	203.046	0.700967	-0.512581	0.00266686	0.0407321
ENSCPOG00000014780	220.744	166.56	274.929	1.65063	0.723019	0.00268092	0.0409096	NEU1	sialidase 1 (lysosomal sialidase) [Source:HGNC Symbol;Acc:7758]
ENSCPOG00000014334	42.7796	30.5802	54.979	1.79786	0.846282	0.00270464	0.041234	RAB32	RAB32, member RAS oncogene family [Source:HGNC Symbol;Acc:9772]
ENSCPOG00000011043	8.05179	3.9907	12.1129	3.03528	1.60183	0.00271323	0.041292
ENSCPOG00000019422	162.328	201.079	123.577	0.614569	-0.702353	0.00271337	0.041292	ALOX5AP	arachidonate 5-lipoxygenase-activating protein [Source:HGNC Symbol;Acc:436]
ENSCPOG00000025714	9.19755	3.86368	14.5314	3.76103	1.91113	0.00272929	0.041481	FAM64A	family with sequence similarity 64, member A [Source:HGNC Symbol;Acc:25483]
ENSCPOG00000012084	11.0041	4.8973	17.111	3.49396	1.80486	0.00273074	0.041481	TMEM82	transmembrane protein 82 [Source:HGNC Symbol;Acc:32350]
ENSCPOG00000013872	51.8954	35.2613	68.5296	1.94348	0.958643	0.00273835	0.041559	AGBL4	ATP/GTP binding protein-like 4 [Source:HGNC Symbol;Acc:25892]
ENSCPOG00000013503	24.3081	32.8723	15.744	0.478944	-1.06207	0.00274312	0.0415937	Scnn1b	amiloride-sensitive sodium channel subunit beta [Source:RefSeq peptide;Acc:NP_001166534]
ENSCPOG00000025134	14.4822	21.802	7.16243	0.328521	-1.60594	0.00274776	0.0416263
ENSCPOG00000025472	1567.94	1272.28	1863.61	1.46477	0.550679	0.00279298	0.0422731	MLC1	megalencephalic leukoencephalopathy with subcortical cysts 1 [Source:HGNC Symbol;Acc:17082]
ENSCPOG00000009244	38.3266	24.2398	52.4134	2.16229	1.11256	0.00284073	0.0429306	Q6EV98_CAVPO	neuroglobin [Source:RefSeq peptide;Acc:NP_001166343]
ENSCPOG00000026387	427.892	498.116	357.669	0.718044	-0.477856	0.00284154	0.0429306	CDR2L	cerebellar degeneration-related protein 2-like [Source:HGNC Symbol;Acc:29999]
ENSCPOG00000004233	98.384	121.032	75.7364	0.625757	-0.676326	0.00286793	0.0432903	METTL23	methyltransferase like 23 [Source:HGNC Symbol;Acc:26988]
ENSCPOG00000000332	77.5708	97.311	57.8306	0.594286	-0.750771	0.00289546	0.0436664	WDR69	WD repeat domain 69 [Source:HGNC Symbol;Acc:26383]
ENSCPOG00000023512	606.387	479.374	733.4	1.52991	0.613451	0.00291093	0.0438603	TRPM2	transient receptor potential cation channel, subfamily M, member 2 [Source:HGNC Symbol;Acc:12339]
ENSCPOG00000008849	70.2185	50.4729	89.9642	1.78242	0.833841	0.00293251	0.0441457
ENSCPOG00000019906	149.702	117.26	182.144	1.55334	0.635374	0.00294647	0.0443161	FAM117A	family with sequence similarity 117, member A [Source:HGNC Symbol;Acc:24179]
ENSCPOG00000010495	100.649	129.876	71.4223	0.549927	-0.862689	0.00295464	0.0443991	GULP1	GULP, engulfment adaptor PTB domain containing 1 [Source:HGNC Symbol;Acc:18649]
ENSCPOG00000004887	144.822	200.268	89.3747	0.446274	-1.164	0.00299079	0.044902	TTC39B	tetratricopeptide repeat domain 39B [Source:HGNC Symbol;Acc:23704]
ENSCPOG00000020539	178.434	138.457	218.411	1.57746	0.657605	0.00299636	0.0449453	BEAN1	brain expressed, associated with NEDD4, 1 [Source:HGNC Symbol;Acc:24160]
ENSCPOG00000001212	17.5596	24.4493	10.6699	0.436409	-1.19625	0.00300255	0.0449913
ENSCPOG00000006811	37.4903	49.4401	25.5405	0.516595	-0.952895	0.00300479	0.0449913	AVPR1B	arginine vasopressin receptor 1B [Source:HGNC Symbol;Acc:896]
ENSCPOG00000005218	14.7358	2.4063	27.0653	11.2477	3.49156	0.00302481	0.0452506	A9LS47_CAVPO	gamma-crystallin N [Source:RefSeq peptide;Acc:NP_001166550]
ENSCPOG00000010355	454.808	370.792	538.824	1.45317	0.539206	0.00303574	0.0453736
ENSCPOG00000020346	37.8239	24.7001	50.9478	2.06265	1.0445	0.00304859	0.0454907
ENSCPOG00000020360	126.106	155.625	96.5861	0.620633	-0.688188	0.00304901	0.0454907
ENSCPOG00000000337	112.318	143.123	81.5137	0.569536	-0.812142	0.00306123	0.0455703	GPN3	GPN-loop GTPase 3 [Source:HGNC Symbol;Acc:30186]
ENSCPOG00000008167	239.552	281.054	198.049	0.704668	-0.504985	0.00306231	0.0455703	NBEAL2	neurobeachin-like 2 [Source:HGNC Symbol;Acc:31928]
ENSCPOG00000025930	1.97928	3.67667	0.281888	0.0766695	-3.7052	0.00306489	0.0455703	WBSCR28	Williams-Beuren syndrome chromosome region 28 [Source:HGNC Symbol;Acc:23018]
ENSCPOG00000024713	87.948	112.138	63.7579	0.568566	-0.814601	0.00306522	0.0455703	WDR89	WD repeat domain 89 [Source:HGNC Symbol;Acc:20489]
ENSCPOG00000004585	471.862	392.561	551.162	1.40402	0.48956	0.0030806	0.0457584	SHMT1	serine hydroxymethyltransferase 1 (soluble) [Source:HGNC Symbol;Acc:10850]
ENSCPOG00000027520	359.86	276.573	443.146	1.60227	0.680119	0.00309255	0.0458951	PDLIM4	PDZ and LIM domain 4 [Source:HGNC Symbol;Acc:16501]
ENSCPOG00000029525	1.43899	0	2.87797	Inf	Inf	0.00310204	0.0459953	Y_RNA	Y RNA [Source:RFAM;Acc:RF00019]
ENSCPOG00000011509	712.554	812.66	612.447	0.753633	-0.408067	0.00313655	0.0464638	C1orf123	chromosome 1 open reading frame 123 [Source:HGNC Symbol;Acc:26059]
ENSCPOG00000010188	7.60447	3.26445	11.9445	3.65896	1.87143	0.00313919	0.0464638	C11orf85	chromosome 11 open reading frame 85 [Source:HGNC Symbol;Acc:27441]
ENSCPOG00000005151	92.0105	115.865	68.156	0.588237	-0.76553	0.00316252	0.0467679	GPR126	G protein-coupled receptor 126 [Source:HGNC Symbol;Acc:13841]
ENSCPOG00000015650	181.026	127.777	234.274	1.83345	0.874563	0.00317331	0.0468861
ENSCPOG00000004694	395.532	481.157	309.908	0.644089	-0.634669	0.00317901	0.0469289	DAF_CAVPO	Complement decay-accelerating factor [Source:UniProtKB/Swiss-Prot;Acc:Q60401]
ENSCPOG00000023628	403.521	284.813	522.228	1.83358	0.874665	0.00318651	0.0469982	BGN	biglycan [Source:HGNC Symbol;Acc:1044]
ENSCPOG00000019892	110.797	70.4488	151.145	2.14546	1.10129	0.0031898	0.0470054	CYBASC3	cytochrome b, ascorbate dependent 3 [Source:HGNC Symbol;Acc:23014]
ENSCPOG00000001149	125.675	160.066	91.2843	0.570292	-0.810228	0.00319576	0.0470517
ENSCPOG00000015506	931.71	1112.99	750.432	0.67425	-0.568644	0.0032024	0.0471082	RASD1	RAS, dexamethasone-induced 1 [Source:HGNC Symbol;Acc:15828]
ENSCPOG00000021819	452.617	566.727	338.507	0.597302	-0.743469	0.00320624	0.0471232	COL6A2	collagen, type VI, alpha 2 [Source:HGNC Symbol;Acc:2212]
ENSCPOG00000023219	11.8366	17.8814	5.79177	0.3239	-1.62638	0.00321047	0.047144
ENSCPOG00000000051	558.995	420.966	697.024	1.65577	0.727502	0.00324611	0.0476257	TSTA3	tissue specific transplantation antigen P35B [Source:HGNC Symbol;Acc:12390]
ENSCPOG00000021493	231.203	276.454	185.952	0.672633	-0.572108	0.00325677	0.0477403	OAF	OAF homolog (Drosophila) [Source:HGNC Symbol;Acc:28752]
ENSCPOG00000015036	23.8726	33.8312	13.914	0.411277	-1.28182	0.00326233	0.04778	DAPP1	dual adaptor of phosphotyrosine and 3-phosphoinositides [Source:HGNC Symbol;Acc:16500]
ENSCPOG00000004617	237.655	148.701	326.609	2.19641	1.13515	0.00331232	0.0484698	ECEL1	endothelin converting enzyme-like 1 [Source:HGNC Symbol;Acc:3147]
ENSCPOG00000010715	345.671	279.271	412.07	1.47552	0.561221	0.00331843	0.0484889	CDC23	cell division cycle 23 homolog (S. cerevisiae) [Source:HGNC Symbol;Acc:1724]
ENSCPOG00000003022	2.14544	3.93422	0.356668	0.090658	-3.46342	0.00331942	0.0484889
ENSCPOG00000023714	72.1543	50.9861	93.3225	1.83035	0.872122	0.00332425	0.0485173	DNAI1	dynein, axonemal, intermediate chain 1 [Source:HGNC Symbol;Acc:2954]
ENSCPOG00000004210	189.934	222.552	157.316	0.706873	-0.500477	0.00333832	0.0486802
ENSCPOG00000027617	5.28738	8.64199	1.93277	0.223649	-2.16069	0.00334154	0.0486848	CCR6	chemokine (C-C motif) receptor 6 [Source:HGNC Symbol;Acc:1607]
ENSCPOG00000006594	109.05	73.4164	144.684	1.97073	0.978729	0.00334988	0.0487638	GFRA3	GDNF family receptor alpha 3 [Source:HGNC Symbol;Acc:4245]
ENSCPOG00000012922	274.235	334.131	214.338	0.641479	-0.640526	0.00335972	0.0488646	RPGRIP1L	RPGRIP1-like [Source:HGNC Symbol;Acc:29168]
ENSCPOG00000005831	636.983	764.019	509.947	0.667453	-0.583261	0.00337449	0.0490369	MSMO1	methylsterol monooxygenase 1 [Source:HGNC Symbol;Acc:10545]
ENSCPOG00000003849	204.895	249.167	160.623	0.64464	-0.633433	0.00338777	0.0491872	C14orf135	chromosome 14 open reading frame 135 [Source:HGNC Symbol;Acc:20349]
ENSCPOG00000015270	51.4662	35.7383	67.1941	1.88017	0.910864	0.00339345	0.0492212	KAZALD1	Kazal-type serine peptidase inhibitor domain 1 [Source:HGNC Symbol;Acc:25460]
ENSCPOG00000013547	485.682	574.481	396.882	0.690853	-0.533549	0.00339771	0.0492212	HGSNAT	heparan-alpha-glucosaminide N-acetyltransferase [Source:HGNC Symbol;Acc:26527]
ENSCPOG00000002485	75.2668	99.3303	51.2033	0.515485	-0.955998	0.00339892	0.0492212	KIF27	kinesin family member 27 [Source:HGNC Symbol;Acc:18632]
ENSCPOG00000002226	229.125	277.933	180.317	0.64878	-0.624198	0.00340233	0.049228	RAD50	RAD50 homolog (S. cerevisiae) [Source:HGNC Symbol;Acc:9816]
ENSCPOG00000024823	151.243	94.4302	208.056	2.20328	1.13965	0.00340673	0.0492492	LCAT	lecithin-cholesterol acyltransferase [Source:HGNC Symbol;Acc:6522]
ENSCPOG00000002990	421.246	333.646	508.846	1.52511	0.60891	0.00342554	0.0494784	UQCC	ubiquinol-cytochrome c reductase complex chaperone [Source:HGNC Symbol;Acc:15891]
ENSCPOG00000026551	3.19439	1.01802	5.37076	5.27571	2.39936	0.0034362	0.0495896
ENSCPOG00000010727	1165.42	1356.49	974.344	0.718282	-0.477377	0.00344195	0.0496054	HEXA	hexosaminidase A (alpha polypeptide) [Source:HGNC Symbol;Acc:4878]
ENSCPOG00000021518	3.31145	5.22105	1.40185	0.268499	-1.89701	0.00344444	0.0496054
ENSCPOG00000002358	2.78534	0.796685	4.77399	5.99231	2.58311	0.00344618	0.0496054	KIF25	kinesin family member 25 [Source:HGNC Symbol;Acc:6390]
ENSCPOG00000002991	311.406	379.472	243.341	0.641261	-0.641015	0.00346037	0.049767	VIP	vasoactive intestinal peptide [Source:HGNC Symbol;Acc:12693]
ENSCPOG00000021041	11.3091	6.178	16.4402	2.66109	1.41202	0.00346569	0.0498008
ENSCPOG00000013443	10.5133	2.80603	18.2205	6.49333	2.69896	0.00346965	0.0498016
ENSCPOG00000007248	111.302	140.106	82.4972	0.58882	-0.764102	0.0034717	0.0498016	C12orf43	chromosome 12 open reading frame 43 [Source:HGNC Symbol;Acc:25719]
ENSCPOG00000012683	647.896	518.273	777.518	1.50021	0.585162	0.00348077	0.049889	PPA2	pyrophosphatase (inorganic) 2 [Source:HGNC Symbol;Acc:28883]
ENSCPOG00000006639	3.12074	1.15	5.09148	4.42737	2.14645	0.00348962	0.0499732	C9orf135	chromosome 9 open reading frame 135 [Source:HGNC Symbol;Acc:31422]
ENSCPOG00000012529	127.722	97.6196	157.824	1.61673	0.693077	0.00349603	0.0500222	MED6	mediator complex subunit 6 [Source:HGNC Symbol;Acc:19970]
ENSCPOG00000009249	35.452	48.2781	22.626	0.468661	-1.09338	0.00350297	0.050045	IGSF10	immunoglobulin superfamily, member 10 [Source:HGNC Symbol;Acc:26384]
ENSCPOG00000002779	43.1019	54.399	31.8047	0.584656	-0.77434	0.00350487	0.050045	HEMK1	HemK methyltransferase family member 1 [Source:HGNC Symbol;Acc:24923]
ENSCPOG00000025374	35.8984	21.5779	50.2188	2.32733	1.21867	0.00350837	0.050045	TLR2	toll-like receptor 2 [Source:HGNC Symbol;Acc:11848]
ENSCPOG00000011350	20.5206	11.3164	29.7247	2.62669	1.39324	0.00350957	0.050045	LGALS3	lectin, galactoside-binding, soluble, 3 [Source:HGNC Symbol;Acc:6563]
ENSCPOG00000016528	9.36837	4.89891	13.8378	2.82467	1.49808	0.00351883	0.0501344	snoU2_19	Small nucleolar RNA U2-19 [Source:RFAM;Acc:RF00494]
ENSCPOG00000015463	197.684	145.809	249.559	1.71154	0.775299	0.0035329	0.0502921	EDNRB	endothelin receptor type B [Source:HGNC Symbol;Acc:3180]
ENSCPOG00000007296	27.4495	18.8148	36.0842	1.91786	0.9395	0.00355281	0.0505325	TXNRD3	thioredoxin reductase 3 [Source:HGNC Symbol;Acc:20667]
ENSCPOG00000015193	218.034	171.852	264.216	1.53746	0.620552	0.00356101	0.0506063	MRPS24	mitochondrial ribosomal protein S24 [Source:HGNC Symbol;Acc:14510]
ENSCPOG00000007623	825.344	682.45	968.238	1.41877	0.504637	0.00356547	0.0506266	HEPACAM	hepatic and glial cell adhesion molecule [Source:HGNC Symbol;Acc:26361]
ENSCPOG00000023751	6.77144	3.47369	10.0692	2.8987	1.53541	0.00363343	0.0515235	CCDC105	coiled-coil domain containing 105 [Source:HGNC Symbol;Acc:26866]
ENSCPOG00000023988	3.4198	1.04748	5.79212	5.5296	2.46718	0.00363478	0.0515235	CDKN2A	cyclin-dependent kinase inhibitor 2A [Source:HGNC Symbol;Acc:1787]
ENSCPOG00000000616	60.7643	79.0849	42.4437	0.536685	-0.897854	0.00365005	0.0516962	WARS2	tryptophanyl tRNA synthetase 2, mitochondrial [Source:HGNC Symbol;Acc:12730]
ENSCPOG00000013677	14.6388	20.8369	8.44069	0.405083	-1.30371	0.00366267	0.0518311	IRX6	iroquois homeobox 6 [Source:HGNC Symbol;Acc:14675]
ENSCPOG00000011537	11.1627	5.23176	17.0936	3.26727	1.70809	0.00368142	0.0520524	KLK13	kallikrein-related peptidase 13 [Source:HGNC Symbol;Acc:6361]
ENSCPOG00000025085	89.7599	112.472	67.0476	0.596126	-0.74631	0.00369636	0.0522083	MAP2K6	mitogen-activated protein kinase kinase 6 [Source:HGNC Symbol;Acc:6846]
ENSCPOG00000005200	1282.72	1019.89	1545.55	1.51541	0.599709	0.00369929	0.0522083	SAMM50	sorting and assembly machinery component 50 homolog (S. cerevisiae) [Source:HGNC Symbol;Acc:24276]
ENSCPOG00000020185	606.113	480.748	731.477	1.52154	0.605531	0.00370179	0.0522083	DAZAP1	DAZ associated protein 1 [Source:HGNC Symbol;Acc:2683]
ENSCPOG00000024662	1.40993	2.65895	0.16091	0.0605163	-4.04653	0.00371296	0.0522084
ENSCPOG00000021594	205.55	241.745	169.355	0.700554	-0.513433	0.00371306	0.0522084	COL23A1	collagen, type XXIII, alpha 1 [Source:HGNC Symbol;Acc:22990]
ENSCPOG00000000809	741.302	441.643	1040.96	2.35702	1.23696	0.00371382	0.0522084
ENSCPOG00000004034	51.9682	37.0322	66.9041	1.80665	0.853314	0.00371426	0.0522084	PIR	pirin (iron-binding nuclear protein) [Source:HGNC Symbol;Acc:30048]
ENSCPOG00000012838	4.42848	6.85493	2.00204	0.292059	-1.77567	0.00372713	0.0523455	PROC	protein C (inactivator of coagulation factors Va and VIIIa) [Source:HGNC Symbol;Acc:9451]
ENSCPOG00000002686	2.15459	0.60637	3.70282	6.10653	2.61035	0.00374435	0.0525433	SLC26A7	solute carrier family 26, member 7 [Source:HGNC Symbol;Acc:14467]
ENSCPOG00000011648	8.08456	12.0837	4.08546	0.338098	-1.56449	0.00375443	0.0526405	BRIP1	BRCA1 interacting protein C-terminal helicase 1 [Source:HGNC Symbol;Acc:20473]
ENSCPOG00000002329	621.153	498.378	743.928	1.4927	0.577923	0.00381144	0.0533952	SPATA2L	spermatogenesis associated 2-like [Source:HGNC Symbol;Acc:28393]
ENSCPOG00000001409	80.5368	56.194	104.88	1.86638	0.900245	0.00382692	0.0535672	VAMP8	vesicle-associated membrane protein 8 (endobrevin) [Source:HGNC Symbol;Acc:12647]
ENSCPOG00000006440	3.7848	6.44933	1.12028	0.173706	-2.52528	0.00383376	0.0536183	SLC13A1	solute carrier family 13 (sodium/sulfate symporters), member 1 [Source:HGNC Symbol;Acc:10916]
ENSCPOG00000018252	1.90238	3.42894	0.375819	0.109602	-3.18965	0.00384082	0.0536721	SNORD113	Small nucleolar RNA SNORD113/SNORD114 family [Source:RFAM;Acc:RF00181]
ENSCPOG00000005153	29.96	37.9258	21.9941	0.579926	-0.78606	0.00384577	0.0536966	BRCA2	breast cancer 2, early onset [Source:HGNC Symbol;Acc:1101]
ENSCPOG00000024072	679.142	821.519	536.765	0.653381	-0.614004	0.00386591	0.0539328	GADD45GIP1	growth arrest and DNA-damage-inducible, gamma interacting protein 1 [Source:HGNC Symbol;Acc:29996]
ENSCPOG00000019534	3.76047	6.42044	1.1005	0.171406	-2.54451	0.0038742	0.0540016	CTLA4	cytotoxic T-lymphocyte-associated protein 4 [Source:HGNC Symbol;Acc:2505]
ENSCPOG00000015659	2.25394	0.429012	4.07887	9.50759	3.24908	0.00387728	0.0540016	PCSK9	proprotein convertase subtilisin/kexin type 9 [Source:HGNC Symbol;Acc:20001]
ENSCPOG00000005777	266.921	189.62	344.222	1.81533	0.860229	0.00389114	0.0541495	ERBB2	v-erb-b2 erythroblastic leukemia viral oncogene homolog 2, neuro/glioblastoma derived oncogene homolog (avian) [Source:HGNC Symbol;Acc:3430]
ENSCPOG00000004058	238.328	188.661	287.995	1.52652	0.610244	0.00395119	0.0549395	ALOX12	arachidonate 12-lipoxygenase [Source:HGNC Symbol;Acc:429]
ENSCPOG00000021409	7.42156	3.27497	11.5681	3.53229	1.8206	0.00395918	0.055005	CDHR3	cadherin-related family member 3 [Source:HGNC Symbol;Acc:26308]
ENSCPOG00000026058	92.2114	111.84	72.5825	0.648983	-0.623747	0.00397162	0.0551321	CAPS	calcyphosine [Source:HGNC Symbol;Acc:1487]
ENSCPOG00000025555	1052.46	836.762	1268.16	1.51555	0.599844	0.00397904	0.0551894	KIAA0930	KIAA0930 [Source:HGNC Symbol;Acc:1314]
ENSCPOG00000009927	275.615	335.246	215.983	0.644253	-0.634301	0.00398895	0.0552811	DGKA	diacylglycerol kinase, alpha 80kDa [Source:HGNC Symbol;Acc:2849]
ENSCPOG00000002633	51.9072	37.1754	66.639	1.79256	0.842018	0.00399521	0.0553221	RSPO2	R-spondin 2 [Source:HGNC Symbol;Acc:28583]
ENSCPOG00000003613	254.528	313.243	195.814	0.625118	-0.6778	0.00400125	0.0553599	TMEM161B	transmembrane protein 161B [Source:HGNC Symbol;Acc:28483]
ENSCPOG00000002722	60.3789	45.2986	75.4592	1.66582	0.736229	0.00400826	0.0554112	SGOL2	shugoshin-like 2 (S. pombe) [Source:HGNC Symbol;Acc:30812]
ENSCPOG00000024170	358.947	268.973	448.921	1.66902	0.739001	0.00401827	0.0555038	PCYOX1L	prenylcysteine oxidase 1 like [Source:HGNC Symbol;Acc:28477]
ENSCPOG00000023803	7.19145	11.0109	3.37201	0.306244	-1.70725	0.00405958	0.0560282
ENSCPOG00000008679	306.438	373.717	239.159	0.639948	-0.643974	0.00407015	0.0561279	TANC1	tetratricopeptide repeat, ankyrin repeat and coiled-coil containing 1 [Source:HGNC Symbol;Acc:29364]
ENSCPOG00000006487	118.197	162.564	73.8294	0.454156	-1.13874	0.00407459	0.0561428	ADAMTS3	ADAM metallopeptidase with thrombospondin type 1 motif, 3 [Source:HGNC Symbol;Acc:219]
ENSCPOG00000012235	115.444	89.8532	141.035	1.56962	0.650411	0.004084	0.0562263	SFRP2	secreted frizzled-related protein 2 [Source:HGNC Symbol;Acc:10777]
ENSCPOG00000006000	9.5337	14.6882	4.37915	0.29814	-1.74594	0.00409671	0.056355
ENSCPOG00000002996	944.065	765.701	1122.43	1.46589	0.551774	0.00410808	0.056465	MYADM	myeloid-associated differentiation marker [Source:HGNC Symbol;Acc:7544]
ENSCPOG00000002330	934.446	1077.34	791.55	0.734726	-0.444723	0.00411154	0.0564662
ENSCPOG00000003590	469.242	391.719	546.765	1.39581	0.481102	0.00411875	0.0565189	BPNT1	3'(2'), 5'-bisphosphate nucleotidase 1 [Source:HGNC Symbol;Acc:1096]
ENSCPOG00000009603	8.04245	12.7325	3.35245	0.263299	-1.92522	0.00412678	0.0565829	ARMC4	armadillo repeat containing 4 [Source:HGNC Symbol;Acc:25583]
ENSCPOG00000027408	17.1029	8.94353	25.2623	2.82465	1.49807	0.00413555	0.0566566	A9LSH6_CAVPO	grifin [Source:RefSeq peptide;Acc:NP_001166554]
ENSCPOG00000005046	2.60644	4.53582	0.677066	0.149271	-2.74399	0.00413961	0.056666	MAEL	maelstrom homolog (Drosophila) [Source:HGNC Symbol;Acc:25929]
ENSCPOG00000015316	18.6166	11.5137	25.7194	2.2338	1.1595	0.00417006	0.0570241	TMEM37	transmembrane protein 37 [Source:HGNC Symbol;Acc:18216]
ENSCPOG00000008788	82.3177	102.429	62.206	0.607306	-0.719504	0.00417258	0.0570241
ENSCPOG00000004550	252.31	191.95	312.671	1.62892	0.703916	0.00421814	0.0575998	UGDH	UDP-glucose 6-dehydrogenase [Source:HGNC Symbol;Acc:12525]
ENSCPOG00000019552	11.146	6.1667	16.1253	2.61491	1.38676	0.0042416	0.0578348
ENSCPOG00000004972	45.1588	59.8613	30.4562	0.50878	-0.974887	0.00424225	0.0578348	FASTKD1	FAST kinase domains 1 [Source:HGNC Symbol;Acc:26150]
ENSCPOG00000026840	148.422	180.697	116.146	0.642767	-0.637632	0.00433562	0.0590572	C9orf167	chromosome 9 open reading frame 167 [Source:HGNC Symbol;Acc:25981]
ENSCPOG00000009274	5.74219	2.49992	8.98446	3.5939	1.84555	0.00433897	0.0590572	BAIAP2L1	BAI1-associated protein 2-like 1 [Source:HGNC Symbol;Acc:21649]
ENSCPOG00000014677	413.597	499.275	327.918	0.656789	-0.606499	0.00436883	0.0594154	MUT	methylmalonyl CoA mutase [Source:HGNC Symbol;Acc:7526]
ENSCPOG00000013816	177.735	210.92	144.55	0.685332	-0.545126	0.00438128	0.0595229
ENSCPOG00000023984	213.266	148.853	277.679	1.86546	0.899534	0.00438655	0.0595229	RPP25	ribonuclease P/MRP 25kDa subunit [Source:HGNC Symbol;Acc:30361]
ENSCPOG00000005645	242.748	295.69	189.805	0.641905	-0.639567	0.00438903	0.0595229	ABHD5	abhydrolase domain containing 5 [Source:HGNC Symbol;Acc:21396]
ENSCPOG00000020419	126.532	89.8875	163.177	1.81535	0.860245	0.00439095	0.0595229	RBP1	retinol binding protein 1, cellular [Source:HGNC Symbol;Acc:9919]
ENSCPOG00000015063	83.7433	108.308	59.1787	0.546393	-0.871989	0.00440378	0.0596275	NUPL2	nucleoporin like 2 [Source:HGNC Symbol;Acc:17010]
ENSCPOG00000011771	56.0817	73.4237	38.7397	0.527618	-0.922434	0.00440578	0.0596275	SVEP1	sushi, von Willebrand factor type A, EGF and pentraxin domain containing 1 [Source:HGNC Symbol;Acc:15985]
ENSCPOG00000023956	104.973	76.6834	133.264	1.73784	0.797295	0.00442657	0.059776	GSTK1	glutathione S-transferase kappa 1 [Source:HGNC Symbol;Acc:16906]
ENSCPOG00000008850	407.603	479.584	335.621	0.699816	-0.514952	0.0044273	0.059776	TARSL2	threonyl-tRNA synthetase-like 2 [Source:HGNC Symbol;Acc:24728]
ENSCPOG00000002182	1152.87	937.451	1368.3	1.45959	0.545564	0.00442746	0.059776	SMPD1	sphingomyelin phosphodiesterase 1, acid lysosomal [Source:HGNC Symbol;Acc:11120]
ENSCPOG00000025336	36.8021	51.4582	22.1459	0.430367	-1.21636	0.00444451	0.0599579
ENSCPOG00000006400	453.015	320.335	585.696	1.82838	0.870569	0.00445254	0.0600179	ANXA2	annexin A2 [Source:HGNC Symbol;Acc:537]
ENSCPOG00000005902	326.142	254.913	397.37	1.55885	0.640479	0.00447947	0.0603325	EXOSC2	exosome component 2 [Source:HGNC Symbol;Acc:17097]
ENSCPOG00000010494	21.5716	30.7726	12.3707	0.402003	-1.31472	0.00449376	0.060452	KLRG1	killer cell lectin-like receptor subfamily G, member 1 [Source:HGNC Symbol;Acc:6380]
ENSCPOG00000013738	655.677	792.83	518.524	0.654017	-0.612601	0.00449556	0.060452	GDE1	glycerophosphodiester phosphodiesterase 1 [Source:HGNC Symbol;Acc:29644]
ENSCPOG00000027336	6.50298	10.1654	2.84059	0.279438	-1.8394	0.00450783	0.0605604	U6	U6 spliceosomal RNA [Source:RFAM;Acc:RF00026]
ENSCPOG00000015545	35.7224	47.3435	24.1013	0.509072	-0.974058	0.00451086	0.0605604	P2RY1_CAVPO	P2Y purinoceptor 1 [Source:UniProtKB/Swiss-Prot;Acc:P59902]
ENSCPOG00000021802	22.2502	13.9817	30.5187	2.18276	1.12615	0.0045385	0.0608828	VAMP5	vesicle-associated membrane protein 5 (myobrevin) [Source:HGNC Symbol;Acc:12646]
ENSCPOG00000010879	19.7975	26.9974	12.5976	0.466624	-1.09967	0.00456714	0.0612179	CSF3R	colony stimulating factor 3 receptor (granulocyte) [Source:HGNC Symbol;Acc:2439]
ENSCPOG00000003178	272.103	334.339	209.867	0.627708	-0.671834	0.004574	0.0612609
ENSCPOG00000013525	268.673	337.343	200.003	0.592878	-0.754192	0.00457951	0.0612857	Q07E11_CAVPO	Met proto-oncogene [Source:UniProtKB/TrEMBL;Acc:Q07E11]
ENSCPOG00000024052	22.2563	31.5983	12.9144	0.408705	-1.29087	0.00460958	0.0615722	FADS6	fatty acid desaturase domain family, member 6 [Source:HGNC Symbol;Acc:30459]
ENSCPOG00000020720	37.3894	48.6998	26.079	0.535505	-0.901029	0.00461062	0.0615722	TEAD4	TEA domain family member 4 [Source:HGNC Symbol;Acc:11717]
ENSCPOG00000000688	310.881	243.356	378.406	1.55495	0.636866	0.00461194	0.0615722	PELI3	pellino E3 ubiquitin protein ligase family member 3 [Source:HGNC Symbol;Acc:30010]
ENSCPOG00000003465	567.932	456.702	679.163	1.4871	0.572504	0.00462222	0.0616603	BAG1	BCL2-associated athanogene [Source:HGNC Symbol;Acc:937]
ENSCPOG00000023523	5.53681	2.27303	8.80058	3.87173	1.95298	0.00467495	0.0623141	ASCL2	achaete-scute complex homolog 2 (Drosophila) [Source:HGNC Symbol;Acc:739]
ENSCPOG00000024541	208.917	157.321	260.514	1.65594	0.72765	0.00468101	0.0623452	ID3	inhibitor of DNA binding 3, dominant negative helix-loop-helix protein [Source:HGNC Symbol;Acc:5362]
ENSCPOG00000003820	427.687	349.432	505.942	1.4479	0.533962	0.00468588	0.0623606	ZNF341	zinc finger protein 341 [Source:HGNC Symbol;Acc:15992]
ENSCPOG00000022137	19.9947	11.2325	28.757	2.56017	1.35624	0.00469268	0.0624014
ENSCPOG00000019954	529.505	390.07	668.939	1.71492	0.778143	0.0046985	0.0624293	IGFBP2	insulin-like growth factor binding protein 2, 36kDa [Source:HGNC Symbol;Acc:5471]
ENSCPOG00000008386	2.18149	3.76543	0.597551	0.158694	-2.65568	0.00475757	0.0631632
ENSCPOG00000025446	1034.26	717.567	1350.96	1.8827	0.9128	0.00476127	0.0631632
ENSCPOG00000013763	1.92551	3.41648	0.434552	0.127193	-2.97491	0.00477169	0.0632319	CSRP3	cysteine and glycine-rich protein 3 (cardiac LIM protein) [Source:HGNC Symbol;Acc:2472]
ENSCPOG00000007190	1.6255	0.241604	3.0094	12.4559	3.63876	0.0047754	0.0632319	FABP4	fatty acid binding protein 4, adipocyte [Source:HGNC Symbol;Acc:3559]
ENSCPOG00000015508	103.39	132.152	74.6287	0.564719	-0.824394	0.0047827	0.0632319	MCPH1	microcephalin 1 [Source:HGNC Symbol;Acc:6954]
ENSCPOG00000024173	13.3745	19.0854	7.66363	0.401544	-1.31637	0.00478453	0.0632319
ENSCPOG00000006943	2819.49	3355.84	2283.13	0.680346	-0.555659	0.00478842	0.0632319	SCRN1	secernin 1 [Source:HGNC Symbol;Acc:22192]
ENSCPOG00000002832	16.3055	22.9103	9.70069	0.42342	-1.23984	0.00478909	0.0632319	SDR9C7	short chain dehydrogenase/reductase family 9C, member 7 [Source:HGNC Symbol;Acc:29958]
ENSCPOG00000011827	266.763	191.319	342.206	1.78867	0.838885	0.00480327	0.0633626	WDR18	WD repeat domain 18 [Source:HGNC Symbol;Acc:17956]
ENSCPOG00000001501	4.36606	1.6112	7.12092	4.41963	2.14393	0.00480656	0.0633626	FAM150B	family with sequence similarity 150, member B [Source:HGNC Symbol;Acc:27683]
ENSCPOG00000004788	184.68	219.522	149.838	0.682566	-0.55096	0.00481588	0.0634356	ECI2	enoyl-CoA delta isomerase 2 [Source:HGNC Symbol;Acc:14601]
ENSCPOG00000021768	16.1426	8.8115	23.4736	2.66398	1.41358	0.00482764	0.0635406	C1QTNF5	C1q and tumor necrosis factor related protein 5 [Source:HGNC Symbol;Acc:14344]
ENSCPOG00000011305	337.389	406.701	268.077	0.659151	-0.60132	0.00487155	0.0640681	WDR3	WD repeat domain 3 [Source:HGNC Symbol;Acc:12755]
ENSCPOG00000021663	1.80934	0.262533	3.35614	12.7837	3.67623	0.00487723	0.0640721	PRND	prion protein 2 (dublet) [Source:HGNC Symbol;Acc:15748]
ENSCPOG00000008486	471.245	561.301	381.189	0.679117	-0.558268	0.0048795	0.0640721	NARG2	NMDA receptor regulated 2 [Source:HGNC Symbol;Acc:29885]
ENSCPOG00000025286	688.365	419.219	957.511	2.28404	1.19159	0.00491598	0.0645006	ENDOG	endonuclease G [Source:HGNC Symbol;Acc:3346]
ENSCPOG00000015077	24.2064	33.6586	14.7543	0.43835	-1.18985	0.00497234	0.0651891	ATP10B	ATPase, class V, type 10B [Source:HGNC Symbol;Acc:13543]
ENSCPOG00000012330	154.07	103.981	204.159	1.96344	0.973381	0.00498276	0.0652745	LEPREL2	leprecan-like 2 [Source:HGNC Symbol;Acc:19318]
ENSCPOG00000022448	5.43279	9.00192	1.86366	0.207029	-2.27209	0.00499268	0.0653534	OR51E1	olfactory receptor, family 51, subfamily E, member 1 [Source:HGNC Symbol;Acc:15194]
ENSCPOG00000014303	118.903	88.5765	149.23	1.68476	0.752543	0.00500279	0.0654089	C6orf130	chromosome 6 open reading frame 130 [Source:HGNC Symbol;Acc:21257]
ENSCPOG00000009192	154.796	118.993	190.6	1.60178	0.679674	0.00500473	0.0654089	DND1	dead end homolog 1 (zebrafish) [Source:HGNC Symbol;Acc:23799]
ENSCPOG00000024896	231.894	122.246	341.542	2.79388	1.48227	0.00503103	0.0657014	ANKRD39	ankyrin repeat domain 39 [Source:HGNC Symbol;Acc:28640]
ENSCPOG00000002342	378.55	448.758	308.343	0.687102	-0.541404	0.00505943	0.0660208	ADSS	adenylosuccinate synthase [Source:HGNC Symbol;Acc:292]
ENSCPOG00000019501	111.456	138.78	84.1318	0.606224	-0.722078	0.00508305	0.0662775
ENSCPOG00000006175	237.945	184.493	291.396	1.57944	0.659413	0.0050877	0.0662865	C15orf27	chromosome 15 open reading frame 27 [Source:HGNC Symbol;Acc:26763]
ENSCPOG00000012985	1158.43	1365.32	951.54	0.696934	-0.520906	0.00509318	0.0663063	SCARB2	scavenger receptor class B, member 2 [Source:HGNC Symbol;Acc:1665]
ENSCPOG00000006084	241.373	283.809	198.936	0.700951	-0.512614	0.00512104	0.0666172	HPS6	Hermansky-Pudlak syndrome 6 [Source:HGNC Symbol;Acc:18817]
ENSCPOG00000014205	294.99	345.392	244.588	0.708147	-0.497879	0.00513931	0.0667349	GSTM2	glutathione S-transferase mu 2 (muscle) [Source:HGNC Symbol;Acc:4634]
ENSCPOG00000014158	10.7008	15.8386	5.56301	0.351232	-1.50951	0.00513988	0.0667349
ENSCPOG00000015256	114.126	92.322	135.93	1.47234	0.558115	0.00514203	0.0667349
ENSCPOG00000002129	48.0363	62.8017	33.2708	0.529775	-0.916547	0.00516153	0.066903
ENSCPOG00000009674	27.5845	20.0549	35.1142	1.75091	0.808101	0.00516374	0.066903	PLIN1	perilipin 1 [Source:HGNC Symbol;Acc:9076]
ENSCPOG00000005612	542.373	667.795	416.952	0.624371	-0.679524	0.00516696	0.066903	SLC39A6	solute carrier family 39 (zinc transporter), member 6 [Source:HGNC Symbol;Acc:18607]
ENSCPOG00000012939	15.2033	24.7051	5.70147	0.230781	-2.1154	0.0051952	0.0672167	C9orf93	chromosome 9 open reading frame 93 [Source:HGNC Symbol;Acc:29828]
ENSCPOG00000004635	69.0248	84.4268	53.6228	0.635139	-0.654855	0.00522256	0.0675185	ACACB	acetyl-CoA carboxylase beta [Source:HGNC Symbol;Acc:85]
ENSCPOG00000026071	11.6557	4.12088	19.1906	4.65691	2.21937	0.00523815	0.0676678	H1FNT	H1 histone family, member N, testis-specific [Source:HGNC Symbol;Acc:24893]
ENSCPOG00000012596	6.66183	10.6999	2.62379	0.245217	-2.02787	0.00524272	0.0676747	EHF	ets homologous factor [Source:HGNC Symbol;Acc:3246]
ENSCPOG00000000387	165.316	193.607	137.026	0.707752	-0.498684	0.005247	0.0676778	PHKG1	phosphorylase kinase, gamma 1 (muscle) [Source:HGNC Symbol;Acc:8930]
ENSCPOG00000008673	12.0566	17.3581	6.75517	0.389165	-1.36155	0.00527127	0.0679386	TDO2	tryptophan 2,3-dioxygenase [Source:HGNC Symbol;Acc:11708]
ENSCPOG00000013786	478.646	567.6	389.693	0.686563	-0.542536	0.00528522	0.068066	SBDS	Shwachman-Bodian-Diamond syndrome [Source:HGNC Symbol;Acc:19440]
ENSCPOG00000012054	222.529	269.743	175.315	0.649934	-0.621635	0.00530089	0.068202	TNFRSF19	tumor necrosis factor receptor superfamily, member 19 [Source:HGNC Symbol;Acc:11915]
ENSCPOG00000021134	102.222	126.216	78.2282	0.619795	-0.690137	0.00530392	0.068202	EPHA8	EPH receptor A8 [Source:HGNC Symbol;Acc:3391]
ENSCPOG00000023976	10.7978	16.6728	4.92283	0.295261	-1.75994	0.00531839	0.0683356
ENSCPOG00000008033	776.159	925.691	626.627	0.676929	-0.562924	0.00533264	0.0684298	SYT13	synaptotagmin XIII [Source:HGNC Symbol;Acc:14962]
ENSCPOG00000004774	29.0408	38.4067	19.6748	0.512276	-0.965008	0.00533389	0.0684298	GALNT8	UDP-N-acetyl-alpha-D-galactosamine:polypeptide N-acetylgalactosaminyltransferase 8 (GalNAc-T8) [Source:HGNC Symbol;Acc:4130]
ENSCPOG00000023093	1.47112	0.311117	2.63113	8.45704	3.08015	0.00536435	0.068768	DSPP	dentin sialophosphoprotein [Source:HGNC Symbol;Acc:3054]
ENSCPOG00000003740	354.408	293.454	415.361	1.41542	0.50123	0.00538448	0.0689733	SLC37A3	solute carrier family 37 (glycerol-3-phosphate transporter), member 3 [Source:HGNC Symbol;Acc:20651]
ENSCPOG00000002823	730.153	568.681	891.626	1.56788	0.648819	0.00540442	0.0691757	RPAP1	RNA polymerase II associated protein 1 [Source:HGNC Symbol;Acc:24567]
ENSCPOG00000005250	40.9466	22.064	59.8293	2.71162	1.43916	0.00541825	0.0692998	MGP	matrix Gla protein [Source:HGNC Symbol;Acc:7060]
ENSCPOG00000024999	323.546	385.134	261.959	0.680176	-0.556021	0.00542979	0.0693944	LGALS3BP	lectin, galactoside-binding, soluble, 3 binding protein [Source:HGNC Symbol;Acc:6564]
ENSCPOG00000006056	541.082	647.145	435.02	0.672214	-0.573007	0.00543529	0.0694118	SERINC5	serine incorporator 5 [Source:HGNC Symbol;Acc:18825]
ENSCPOG00000029344	0.695946	1.39189	0	0	#NAME?	0.00544401	0.0694287	U6	U6 spliceosomal RNA [Source:RFAM;Acc:RF00026]
ENSCPOG00000021196	3.75859	0.641126	6.87606	10.725	3.4229	0.0054449	0.0694287	COL28A1	collagen, type XXVIII, alpha 1 [Source:HGNC Symbol;Acc:22442]
ENSCPOG00000000153	133.603	160.851	106.355	0.661198	-0.596846	0.00545103	0.069454	TMEM98	transmembrane protein 98 [Source:HGNC Symbol;Acc:24529]
ENSCPOG00000013587	307.909	256.767	359.051	1.39836	0.483733	0.00546909	0.0696311	IDH1	isocitrate dehydrogenase 1 (NADP+), soluble [Source:HGNC Symbol;Acc:5382]
ENSCPOG00000026345	29.7101	19.6817	39.7385	2.01906	1.01368	0.00548127	0.0697333
ENSCPOG00000023830	1.29703	2.47517	0.118889	0.0480328	-4.37984	0.00548928	0.0697821
ENSCPOG00000025907	2.19114	0.614526	3.76775	6.13115	2.61616	0.00551452	0.0700499	C3orf49	chromosome 3 open reading frame 49 [Source:HGNC Symbol;Acc:25190]
ENSCPOG00000024279	717.318	552.507	882.128	1.59659	0.674995	0.00555115	0.0704618	SDF2L1	stromal cell-derived factor 2-like 1 [Source:HGNC Symbol;Acc:10676]
ENSCPOG00000009124	210.591	255.096	166.085	0.651069	-0.619119	0.0055591	0.0704973	TRMT11	tRNA methyltransferase 11 homolog (S. cerevisiae) [Source:HGNC Symbol;Acc:21080]
ENSCPOG00000023519	231.862	279.273	184.45	0.660466	-0.598444	0.00556236	0.0704973	C1orf159	chromosome 1 open reading frame 159 [Source:HGNC Symbol;Acc:26062]
ENSCPOG00000014546	7.54206	4.05667	11.0274	2.71835	1.44273	0.00557063	0.0705487	CP17A_CAVPO	Steroid 17-alpha-hydroxylase/17,20 lyase [Source:UniProtKB/Swiss-Prot;Acc:Q64410]
ENSCPOG00000014024	237.779	299.488	176.069	0.587901	-0.766354	0.00562574	0.0711928	MKLN1	muskelin 1, intracellular mediator containing kelch motifs [Source:HGNC Symbol;Acc:7109]
ENSCPOG00000005429	248.58	196.745	300.414	1.52692	0.610621	0.00565746	0.0715402	GLRX2	glutaredoxin 2 [Source:HGNC Symbol;Acc:16065]
ENSCPOG00000007996	18.8215	26.1078	11.5353	0.441833	-1.17843	0.0057006	0.0720286
ENSCPOG00000015314	15.145	21.9005	8.3895	0.383073	-1.38431	0.00570849	0.0720286	CCDC39	coiled-coil domain containing 39 [Source:HGNC Symbol;Acc:25244]
ENSCPOG00000010452	206.536	159.014	254.057	1.5977	0.675995	0.00570898	0.0720286	C16orf42	chromosome 16 open reading frame 42 [Source:HGNC Symbol;Acc:14175]
ENSCPOG00000015749	37.8137	24.971	50.6565	2.02861	1.02049	0.00572895	0.0722262	SLCO4A1	solute carrier organic anion transporter family, member 4A1 [Source:HGNC Symbol;Acc:10953]
ENSCPOG00000011540	83.7373	58.8113	108.663	1.84766	0.885702	0.00574194	0.0723356	KIAA1614	KIAA1614 [Source:HGNC Symbol;Acc:29327]
ENSCPOG00000008277	667.69	533.206	802.174	1.50443	0.589221	0.00574964	0.07236	TUBGCP2	tubulin, gamma complex associated protein 2 [Source:HGNC Symbol;Acc:18599]
ENSCPOG00000006640	195.085	236.22	153.949	0.651719	-0.617677	0.00575252	0.07236	RBMX2	RNA binding motif protein, X-linked 2 [Source:HGNC Symbol;Acc:24282]
ENSCPOG00000003125	26.101	33.7802	18.4217	0.54534	-0.874773	0.00577643	0.0726062	BTG4	B-cell translocation gene 4 [Source:HGNC Symbol;Acc:13862]
ENSCPOG00000024985	4.3659	6.91971	1.8121	0.261875	-1.93305	0.00579209	0.0727063
ENSCPOG00000014639	55.7325	75.1344	36.3307	0.483542	-1.04829	0.00579684	0.0727063	GOLT1B	golgi transport 1B [Source:HGNC Symbol;Acc:20175]
ENSCPOG00000003739	1019.13	851.085	1187.18	1.3949	0.480165	0.00579741	0.0727063	AT1B3_CAVPO	Sodium/potassium-transporting ATPase subunit beta-3 [Source:UniProtKB/Swiss-Prot;Acc:Q60489]
ENSCPOG00000013785	218.497	259.98	177.014	0.680874	-0.554539	0.00583439	0.0730672	ALDH3A2	aldehyde dehydrogenase 3 family, member A2 [Source:HGNC Symbol;Acc:403]
ENSCPOG00000027242	2.89275	5.46367	0.32182	0.0589018	-4.08555	0.00583491	0.0730672	C12orf60	chromosome 12 open reading frame 60 [Source:HGNC Symbol;Acc:28726]
ENSCPOG00000019466	9.42418	14.2408	4.60761	0.323551	-1.62794	0.00585448	0.0732576	PKHD1L1	polycystic kidney and hepatic disease 1 (autosomal recessive)-like 1 [Source:HGNC Symbol;Acc:20313]
ENSCPOG00000019432	7.9687	3.10579	12.8316	4.13151	2.04667	0.00587961	0.0735171	P2RX3	purinergic receptor P2X, ligand-gated ion channel, 3 [Source:HGNC Symbol;Acc:8534]
ENSCPOG00000006103	165.713	116.795	214.631	1.83768	0.877885	0.00589298	0.0736103
ENSCPOG00000012724	828.868	630.845	1026.89	1.6278	0.702925	0.00589585	0.0736103	RTKN	rhotekin [Source:HGNC Symbol;Acc:10466]
ENSCPOG00000013359	741.008	588.253	893.762	1.51935	0.603454	0.00590302	0.0736449	ACP2	acid phosphatase 2, lysosomal [Source:HGNC Symbol;Acc:123]
ENSCPOG00000019936	40.577	24.7246	56.4294	2.28232	1.1905	0.00591184	0.0737	ARMC10	armadillo repeat containing 10 [Source:HGNC Symbol;Acc:21706]
ENSCPOG00000021184	6.43536	2.60267	10.2681	3.94521	1.9801	0.00592323	0.0737473	CCDC69	coiled-coil domain containing 69 [Source:HGNC Symbol;Acc:24487]
ENSCPOG00000006823	58.2191	71.5399	44.8984	0.627598	-0.672086	0.00592443	0.0737473	TMCO4	transmembrane and coiled-coil domains 4 [Source:HGNC Symbol;Acc:27393]
ENSCPOG00000009415	7.0087	10.2106	3.80675	0.372822	-1.42344	0.00594043	0.0738916	WNT9B	wingless-type MMTV integration site family, member 9B [Source:HGNC Symbol;Acc:12779]
ENSCPOG00000015086	109.045	141.192	76.8983	0.544638	-0.87663	0.00595339	0.0739978	OSMR	oncostatin M receptor [Source:HGNC Symbol;Acc:8507]
ENSCPOG00000013368	54.5881	27.1958	81.9804	3.01445	1.59189	0.006008	0.0746213	MYBPC3	myosin binding protein C, cardiac [Source:HGNC Symbol;Acc:7551]
ENSCPOG00000007392	369.999	440.118	299.88	0.681362	-0.553506	0.00602885	0.0747947	ZNF639	zinc finger protein 639 [Source:HGNC Symbol;Acc:30950]
ENSCPOG00000009561	1.82735	3.22488	0.429817	0.133282	-2.90745	0.00603212	0.0747947	OR2B11	olfactory receptor, family 2, subfamily B, member 11 [Source:HGNC Symbol;Acc:31249]
ENSCPOG00000002746	1938.29	2397.08	1479.49	0.617204	-0.69618	0.00603535	0.0747947	CD74	CD74 molecule, major histocompatibility complex, class II invariant chain [Source:HGNC Symbol;Acc:1697]
ENSCPOG00000019663	21.1713	10.9032	31.4395	2.88351	1.52783	0.00604833	0.0749	OTOP2	otopetrin 2 [Source:HGNC Symbol;Acc:19657]
ENSCPOG00000004874	109.108	78.2731	139.942	1.78787	0.838244	0.00606054	0.0749958	GBGT1	globoside alpha-1,3-N-acetylgalactosaminyltransferase 1 [Source:HGNC Symbol;Acc:20460]
ENSCPOG00000021911	6.6025	3.04635	10.1586	3.3347	1.73756	0.00608727	0.075271
ENSCPOG00000001446	48.1179	61.7394	34.4964	0.558742	-0.839746	0.00609929	0.0752888	FANCM	Fanconi anemia, complementation group M [Source:HGNC Symbol;Acc:23168]
ENSCPOG00000003182	24.5239	15.9633	33.0844	2.07253	1.05139	0.00610228	0.0752888	PTGER2	prostaglandin E receptor 2 (subtype EP2), 53kDa [Source:HGNC Symbol;Acc:9594]
ENSCPOG00000022931	195.941	240.142	151.74	0.631877	-0.662285	0.00610314	0.0752888	CHUK	conserved helix-loop-helix ubiquitous kinase [Source:HGNC Symbol;Acc:1974]
ENSCPOG00000008114	133.212	163.028	103.396	0.63422	-0.656944	0.00610668	0.0752888	NME9	NME family member 9 [Source:HGNC Symbol;Acc:21343]
ENSCPOG00000000949	709.568	559.784	859.352	1.53515	0.61838	0.00611232	0.0753029	MRPL43	mitochondrial ribosomal protein L43 [Source:HGNC Symbol;Acc:14517]
ENSCPOG00000003916	68.08	88.1237	48.0362	0.5451	-0.875406	0.00613251	0.0754961	SELRC1	Sel1 repeat containing 1 [Source:HGNC Symbol;Acc:25716]
ENSCPOG00000001918	130.733	101.957	159.508	1.56446	0.645667	0.00613877	0.0755074	SWSAP1	SWIM-type zinc finger 7 associated protein 1 [Source:HGNC Symbol;Acc:26638]
ENSCPOG00000023227	3.51864	1.02568	6.01161	5.86112	2.55118	0.00614244	0.0755074
ENSCPOG00000007103	349.925	414.962	284.888	0.68654	-0.542584	0.00615722	0.0756335	MSN	moesin [Source:HGNC Symbol;Acc:7373]
ENSCPOG00000015453	297.622	361.108	234.135	0.64838	-0.625088	0.0061745	0.0757903	BEND6	BEN domain containing 6 [Source:HGNC Symbol;Acc:20871]
ENSCPOG00000011703	13.7237	19.7523	7.69514	0.389583	-1.36	0.00619044	0.0759303	IZUMO2	IZUMO family member 2 [Source:HGNC Symbol;Acc:28518]
ENSCPOG00000002888	73.6306	90.7043	56.5569	0.623531	-0.681468	0.0062132	0.0761538	MED31	mediator complex subunit 31 [Source:HGNC Symbol;Acc:24260]
ENSCPOG00000004864	23.3337	14.1649	32.5025	2.29458	1.19823	0.00621797	0.0761566	SLC2A9	solute carrier family 2 (facilitated glucose transporter), member 9 [Source:HGNC Symbol;Acc:13446]
ENSCPOG00000006950	38.8001	50.8198	26.7805	0.526969	-0.924209	0.00623538	0.0762749	EPHX3	epoxide hydrolase 3 [Source:HGNC Symbol;Acc:23760]
ENSCPOG00000018242	3.78891	6.15692	1.4209	0.230781	-2.1154	0.00623674	0.0762749	SNORD74	Small nucleolar RNA SNORD74 [Source:RFAM;Acc:RF00284]
ENSCPOG00000001347	174.398	210.689	138.108	0.655505	-0.609321	0.00625157	0.0764005	CDO1	cysteine dioxygenase, type I [Source:HGNC Symbol;Acc:1795]
ENSCPOG00000012776	1014.78	786.737	1242.81	1.57971	0.659656	0.00627403	0.076619	PENK_CAVPO	Proenkephalin-A Synenkephalin Met-enkephalin PENK(114-133) PENK(143-184) Met-enkephalin-Arg-Gly-Leu Leu-enkephalin PENK(238-259) Met-enkephalin-Arg-Phe [Source:UniProtKB/Swiss-Prot;Acc:P47969]
ENSCPOG00000007345	15.8458	22.6129	9.07874	0.401486	-1.31658	0.00631361	0.0769909	LIPK	lipase, family member K [Source:HGNC Symbol;Acc:23444]
ENSCPOG00000008466	3.6619	0.700507	6.62329	9.455	3.24108	0.00632124	0.0769909	TRBV30	T cell receptor beta variable 30 (gene/pseudogene) [Source:HGNC Symbol;Acc:12214]
ENSCPOG00000007223	49.595	61.8191	37.3708	0.604519	-0.726142	0.00632266	0.0769909	CDC25B	cell division cycle 25 homolog B (S. pombe) [Source:HGNC Symbol;Acc:1726]
ENSCPOG00000014206	416.125	331.314	500.937	1.51197	0.596429	0.00632286	0.0769909
ENSCPOG00000007010	27.7233	37.5097	17.9368	0.47819	-1.06434	0.00637935	0.0776223	LOXL4	lysyl oxidase-like 4 [Source:HGNC Symbol;Acc:17171]
ENSCPOG00000022353	5.94554	2.02356	9.86752	4.87633	2.28579	0.00639051	0.0777018	GCNT3	glucosaminyl (N-acetyl) transferase 3, mucin type [Source:HGNC Symbol;Acc:4205]
ENSCPOG00000009847	340.018	412.351	267.685	0.649168	-0.623337	0.00640047	0.0777664	PTPN3	protein tyrosine phosphatase, non-receptor type 3 [Source:HGNC Symbol;Acc:9655]
ENSCPOG00000009596	764.186	580.996	947.375	1.63061	0.705408	0.00642993	0.0780677	INPP5E	inositol polyphosphate-5-phosphatase, 72 kDa [Source:HGNC Symbol;Acc:21474]
ENSCPOG00000021434	8.30086	2.9002	13.7015	4.72434	2.24011	0.00645241	0.078284
ENSCPOG00000003088	18.6947	24.9047	12.4847	0.501298	-0.99626	0.00645834	0.0782992	2012-09-01	septin 1 [Source:HGNC Symbol;Acc:2879]
ENSCPOG00000026861	468.659	374.966	562.352	1.49974	0.584714	0.0064755	0.0784504	SLC9A3R2	solute carrier family 9, subfamily A (NHE3, cation proton antiporter 3), member 3 regulator 2 [Source:HGNC Symbol;Acc:11076]
ENSCPOG00000000288	478.019	319.775	636.264	1.98972	0.992567	0.00649092	0.0785805	GRM4	glutamate receptor, metabotropic 4 [Source:HGNC Symbol;Acc:4596]
ENSCPOG00000017425	22180.7	16507.1	27854.2	1.68741	0.754807	0.00650442	0.0786871	Q9TEG2_CAVPO	NADH dehydrogenase subunit 4 [Source:RefSeq peptide;Acc:NP_008760]
ENSCPOG00000013276	357.978	286.632	429.325	1.49783	0.582869	0.00657583	0.0794935	XYLT2	xylosyltransferase II [Source:HGNC Symbol;Acc:15517]
ENSCPOG00000004733	879.741	653.22	1106.26	1.69355	0.760051	0.0065959	0.0795748	DTNB	dystrobrevin, beta [Source:HGNC Symbol;Acc:3058]
ENSCPOG00000014846	124.979	97.7656	152.192	1.5567	0.638495	0.00660137	0.0795748	LRRC3B	leucine rich repeat containing 3B [Source:HGNC Symbol;Acc:28105]
ENSCPOG00000026062	396.458	467.399	325.518	0.696445	-0.521918	0.00660279	0.0795748	PLAT	plasminogen activator, tissue [Source:HGNC Symbol;Acc:9051]
ENSCPOG00000021691	149.594	113.516	185.673	1.63565	0.709868	0.00660794	0.0795748	MOK	MOK protein kinase [Source:HGNC Symbol;Acc:9833]
ENSCPOG00000012191	40.5421	22.2462	58.8381	2.64486	1.40319	0.00661102	0.0795748	SPHK1	sphingosine kinase 1 [Source:HGNC Symbol;Acc:11240]
ENSCPOG00000005034	29.4043	13.4688	45.3398	3.3663	1.75116	0.00661105	0.0795748	DUOXA2	dual oxidase maturation factor 2 [Source:HGNC Symbol;Acc:32698]
ENSCPOG00000021063	1458.3	1206.58	1710.02	1.41725	0.503092	0.00668383	0.0803931	L3MBTL2	l(3)mbt-like 2 (Drosophila) [Source:HGNC Symbol;Acc:18594]
ENSCPOG00000007853	35.6342	47.6952	23.5731	0.494245	-1.0167	0.00669542	0.0804747
ENSCPOG00000012212	223.907	266.391	181.424	0.681045	-0.554178	0.00670711	0.0805575	QPCT	glutaminyl-peptide cyclotransferase [Source:HGNC Symbol;Acc:9753]
ENSCPOG00000013120	1168.24	1335.45	1001.03	0.749583	-0.41584	0.00671736	0.0806215	ALDH7A1	aldehyde dehydrogenase 7 family, member A1 [Source:HGNC Symbol;Acc:877]
ENSCPOG00000015460	43.8896	57.4869	30.2922	0.526941	-0.924286	0.00672207	0.0806215	SLC46A3	solute carrier family 46, member 3 [Source:HGNC Symbol;Acc:27501]
ENSCPOG00000015191	37.1714	25.2454	49.0974	1.94481	0.959629	0.00677651	0.0812164	GAS2	growth arrest-specific 2 [Source:HGNC Symbol;Acc:4167]
ENSCPOG00000011930	174.599	128.9	220.297	1.70905	0.773194	0.00686847	0.0822014	C12orf73	chromosome 12 open reading frame 73 [Source:HGNC Symbol;Acc:34450]
ENSCPOG00000005012	197.826	236.779	158.874	0.670979	-0.57566	0.00687245	0.0822014	ANKRD32	ankyrin repeat domain 32 [Source:HGNC Symbol;Acc:25408]
ENSCPOG00000009460	52.2226	64.9012	39.5441	0.609297	-0.714783	0.00688151	0.0822014	PTPRC	protein tyrosine phosphatase, receptor type, C [Source:HGNC Symbol;Acc:9666]
ENSCPOG00000003158	378.988	257.675	500.302	1.9416	0.957248	0.00688316	0.0822014	SLC46A1	solute carrier family 46 (folate transporter), member 1 [Source:HGNC Symbol;Acc:30521]
ENSCPOG00000005142	551.16	456.904	645.416	1.41259	0.498339	0.00688324	0.0822014	CDC42SE2	CDC42 small effector 2 [Source:HGNC Symbol;Acc:18547]
ENSCPOG00000008589	189.087	153.109	225.064	1.46996	0.555773	0.00688939	0.0822163	NTPCR	nucleoside-triphosphatase, cancer-related [Source:HGNC Symbol;Acc:28204]
ENSCPOG00000004722	403.985	295.954	512.017	1.73006	0.790819	0.006898	0.0822605	S100A16	S100 calcium binding protein A16 [Source:HGNC Symbol;Acc:20441]
ENSCPOG00000004594	2.9847	0.802453	5.16694	6.43894	2.68682	0.00692234	0.0824921	ZDHHC19	zinc finger, DHHC-type containing 19 [Source:HGNC Symbol;Acc:20713]
ENSCPOG00000019279	47.9817	29.9051	66.0583	2.20894	1.14335	0.00695501	0.0828225	PAPLN	papilin, proteoglycan-like sulfated glycoprotein [Source:HGNC Symbol;Acc:19262]
ENSCPOG00000005345	145.534	176.9	114.168	0.645378	-0.631784	0.00696946	0.082929	EFHA1	EF-hand domain family, member A1 [Source:HGNC Symbol;Acc:31830]
ENSCPOG00000010118	42.3982	51.7471	33.0492	0.638668	-0.646862	0.00697386	0.082929	AMICA1	adhesion molecule, interacts with CXADR antigen 1 [Source:HGNC Symbol;Acc:19084]
ENSCPOG00000027369	478.168	552.828	403.508	0.729897	-0.454234	0.0070076	0.0832712	TSPAN17	tetraspanin 17 [Source:HGNC Symbol;Acc:13594]
ENSCPOG00000010189	797.829	620.509	975.149	1.57153	0.652171	0.00702213	0.0833847	DYRK1B	dual-specificity tyrosine-(Y)-phosphorylation regulated kinase 1B [Source:HGNC Symbol;Acc:3092]
ENSCPOG00000011844	142.699	173.966	111.433	0.640545	-0.642628	0.00703275	0.0834191	CEP57L1	centrosomal protein 57kDa-like 1 [Source:HGNC Symbol;Acc:21561]
ENSCPOG00000022203	1687.14	1313.01	2061.26	1.56987	0.650647	0.00704096	0.0834191	DACT3	dapper, antagonist of beta-catenin, homolog 3 (Xenopus laevis) [Source:HGNC Symbol;Acc:30745]
ENSCPOG00000020561	9.0905	12.3125	5.86851	0.47663	-1.06906	0.00704606	0.0834191	GPR152	G protein-coupled receptor 152 [Source:HGNC Symbol;Acc:23622]
ENSCPOG00000024193	2.13361	3.78448	0.48273	0.127555	-2.97081	0.00704707	0.0834191	GLUC_CAVPO	Glucagon Glicentin Glicentin-related polypeptide Oxyntomodulin Glucagon Glucagon-like peptide 1 Glucagon-like peptide 1(7-37) Glucagon-like peptide 1(7-36) Glucagon-like peptide 2 [Source:UniProtKB/Swiss-Prot;Acc:P05110]
ENSCPOG00000009963	87.5773	109.681	65.4737	0.596947	-0.744324	0.00704992	0.0834191	ANTXR1	anthrax toxin receptor 1 [Source:HGNC Symbol;Acc:21014]
ENSCPOG00000025385	182.087	142.75	221.424	1.55113	0.633323	0.00707406	0.0836457	PCOLCE	procollagen C-endopeptidase enhancer [Source:HGNC Symbol;Acc:8738]
ENSCPOG00000001571	564.792	661.074	468.509	0.708708	-0.496736	0.00708591	0.0837267	DNAJA4	DnaJ (Hsp40) homolog, subfamily A, member 4 [Source:HGNC Symbol;Acc:14885]
ENSCPOG00000027319	412.007	337.608	486.405	1.44074	0.526808	0.00709844	0.0837889	TMEM108	transmembrane protein 108 [Source:HGNC Symbol;Acc:28451]
ENSCPOG00000013343	38.7146	23.2596	54.1695	2.32891	1.21966	0.00710403	0.0837889	C9orf24	chromosome 9 open reading frame 24 [Source:HGNC Symbol;Acc:19919]
ENSCPOG00000006563	60.0451	45.7303	74.36	1.62605	0.701376	0.00711083	0.0837889	IMPACT	Impact homolog (mouse) [Source:HGNC Symbol;Acc:20387]
ENSCPOG00000001792	438.826	351.573	526.079	1.49636	0.581456	0.00711255	0.0837889	NPHP4	nephronophthisis 4 [Source:HGNC Symbol;Acc:19104]
ENSCPOG00000022040	26.5024	35.5712	17.4336	0.490104	-1.02884	0.0071187	0.0837889	LOC100379221	PH-30 alpha [Source:RefSeq peptide;Acc:NP_001166567]
ENSCPOG00000007803	1739.75	1403.38	2076.13	1.47938	0.564991	0.00712118	0.0837889	GSTMU_CAVPO	Glutathione S-transferase B [Source:UniProtKB/Swiss-Prot;Acc:P16413]
ENSCPOG00000010293	448.842	534.831	362.853	0.678445	-0.559697	0.00712669	0.0837949	ITGB1BP1	integrin beta 1 binding protein 1 [Source:HGNC Symbol;Acc:23927]
ENSCPOG00000020511	2.11715	0.412323	3.82198	9.26939	3.21247	0.00722569	0.0848993	APOA1	apolipoprotein A-I [Source:HGNC Symbol;Acc:600]
ENSCPOG00000008418	254.812	311.212	198.412	0.637547	-0.649396	0.00723342	0.0849306	ITGA6	integrin, alpha 6 [Source:HGNC Symbol;Acc:6142]
ENSCPOG00000000878	11.2189	16.3883	6.04951	0.369136	-1.43778	0.00724028	0.0849516	HMMR	hyaluronan-mediated motility receptor (RHAMM) [Source:HGNC Symbol;Acc:5012]
ENSCPOG00000026990	162.462	125.704	199.22	1.58483	0.66433	0.00728675	0.085437	BDH1	3-hydroxybutyrate dehydrogenase, type 1 [Source:HGNC Symbol;Acc:1027]
ENSCPOG00000000348	2.66801	4.9975	0.338533	0.0677405	-3.88384	0.00729583	0.0854385
ENSCPOG00000011544	49.6636	63.5787	35.7486	0.562273	-0.830658	0.00729708	0.0854385	CLSPN	claspin [Source:HGNC Symbol;Acc:19715]
ENSCPOG00000003221	112.007	84.3952	139.618	1.65434	0.726253	0.00731829	0.0856271	CCDC65	coiled-coil domain containing 65 [Source:HGNC Symbol;Acc:29937]
ENSCPOG00000003908	57.1604	71.7203	42.6004	0.593979	-0.751516	0.00733027	0.0857074	CARD11	caspase recruitment domain family, member 11 [Source:HGNC Symbol;Acc:16393]
ENSCPOG00000003780	34.6998	44.0093	25.3904	0.576933	-0.793524	0.00735212	0.0859029	EPB41L5	erythrocyte membrane protein band 4.1 like 5 [Source:HGNC Symbol;Acc:19819]
ENSCPOG00000002149	25.9939	14.4105	37.5773	2.60763	1.38274	0.00740142	0.0864187	CCDC37	coiled-coil domain containing 37 [Source:HGNC Symbol;Acc:26842]
ENSCPOG00000029806	1.78717	3.21766	0.356668	0.110847	-3.17336	0.00742156	0.0865511	SCARNA3	Small Cajal body specific RNA 3 [Source:RFAM;Acc:RF00565]
ENSCPOG00000000477	84.6646	104.706	64.623	0.617185	-0.696226	0.00742309	0.0865511	CHST3	carbohydrate (chondroitin 6) sulfotransferase 3 [Source:HGNC Symbol;Acc:1971]
ENSCPOG00000024215	3.4332	1.17621	5.69018	4.83771	2.27433	0.00742995	0.0865707	SPATA4	spermatogenesis associated 4 [Source:HGNC Symbol;Acc:17333]
ENSCPOG00000002656	310.554	367.515	253.594	0.690023	-0.535284	0.00749681	0.0872891	ME1	malic enzyme 1, NADP(+)-dependent, cytosolic [Source:HGNC Symbol;Acc:6983]
ENSCPOG00000007244	32.1858	41.7105	22.6611	0.543294	-0.880194	0.0075052	0.0873261	TEX9	testis expressed 9 [Source:HGNC Symbol;Acc:29585]
ENSCPOG00000000177	27.9606	12.5318	43.3894	3.46233	1.79174	0.00751779	0.0874119	DSCR6	Down syndrome critical region gene 6 [Source:HGNC Symbol;Acc:3047]
ENSCPOG00000001125	147.526	45.7674	249.284	5.44675	2.4454	0.00752359	0.0874187	PALM3	paralemmin 3 [Source:HGNC Symbol;Acc:33274]
ENSCPOG00000000503	6.45827	2.8358	10.0807	3.55481	1.82977	0.00753126	0.0874472	CD36	CD36 molecule (thrombospondin receptor) [Source:HGNC Symbol;Acc:1663]
ENSCPOG00000006311	22.7139	12.784	32.6438	2.55349	1.35247	0.00758428	0.0880019	C10orf10	chromosome 10 open reading frame 10 [Source:HGNC Symbol;Acc:23355]
ENSCPOG00000014044	72.6814	53.6633	91.6996	1.7088	0.772979	0.00759456	0.0880602	C14orf93	chromosome 14 open reading frame 93 [Source:HGNC Symbol;Acc:20162]
ENSCPOG00000005529	65.5437	48.6706	82.4169	1.69336	0.75989	0.00760638	0.0880855	ENDOV	endonuclease V [Source:HGNC Symbol;Acc:26640]
ENSCPOG00000000412	243.783	199.919	287.647	1.43882	0.524884	0.00761215	0.0880855	RGP1	RGP1 retrograde golgi transport homolog (S. cerevisiae) [Source:HGNC Symbol;Acc:21965]
ENSCPOG00000006232	56.8234	36.5975	77.0493	2.10531	1.07403	0.00761371	0.0880855	GDF1	growth differentiation factor 1 [Source:HGNC Symbol;Acc:4214]
ENSCPOG00000006601	127.111	159.297	94.9251	0.595902	-0.746853	0.00761778	0.0880855	SLC16A14	solute carrier family 16, member 14 (monocarboxylic acid transporter 14) [Source:HGNC Symbol;Acc:26417]
ENSCPOG00000005162	32.8742	44.2755	21.4729	0.484983	-1.04399	0.00762585	0.088118
ENSCPOG00000000619	423.03	505.601	340.46	0.673377	-0.570513	0.00763681	0.0881838	CALB1	calbindin 1, 28kDa [Source:HGNC Symbol;Acc:1434]
ENSCPOG00000004490	2.81232	5.18534	0.439287	0.0847171	-3.5612	0.00767523	0.0885381	IGFN1	immunoglobulin-like and fibronectin type III domain containing 1 [Source:HGNC Symbol;Acc:24607]
ENSCPOG00000010001	154.781	189.856	119.707	0.630511	-0.665407	0.00767806	0.0885381	KDR	kinase insert domain receptor (a type III receptor tyrosine kinase) [Source:HGNC Symbol;Acc:6307]
ENSCPOG00000007748	88.0431	106.302	69.7845	0.656477	-0.607184	0.00769137	0.0886249	ITGA5	integrin, alpha 5 (fibronectin receptor, alpha polypeptide) [Source:HGNC Symbol;Acc:6141]
ENSCPOG00000028866	4.16339	1.09754	7.22923	6.58675	2.71957	0.00769616	0.0886249	SNORA73	Small nucleolar RNA SNORA73 family [Source:RFAM;Acc:RF00045]
ENSCPOG00000022723	28.7883	20.2353	37.3413	1.84535	0.883896	0.00770271	0.0886393	C17orf67	chromosome 17 open reading frame 67 [Source:HGNC Symbol;Acc:27900]
ENSCPOG00000000185	385.191	235.45	534.931	2.27195	1.18393	0.00771653	0.0887168	FBXO6	F-box protein 6 [Source:HGNC Symbol;Acc:13585]
ENSCPOG00000013480	2.82731	0.962134	4.69248	4.87716	2.28604	0.00772467	0.0887168	C7orf61	chromosome 7 open reading frame 61 [Source:HGNC Symbol;Acc:22135]
ENSCPOG00000029164	1.8871	0.241604	3.53259	14.6214	3.87001	0.00772639	0.0887168	SNORA38	Small nucleolar RNA SNORA38 [Source:RFAM;Acc:RF00428]
ENSCPOG00000002163	35.3145	46.5514	24.0776	0.517226	-0.951134	0.00773566	0.0887168	C11orf63	chromosome 11 open reading frame 63 [Source:HGNC Symbol;Acc:26288]
ENSCPOG00000026495	11.6045	5.87237	17.3367	2.95225	1.56182	0.00773592	0.0887168
ENSCPOG00000009931	2.19423	3.98769	0.400777	0.100504	-3.31468	0.00778569	0.0891753	NMUR2	neuromedin U receptor 2 [Source:HGNC Symbol;Acc:16454]
ENSCPOG00000000459	13.607	17.7572	9.45679	0.53256	-0.908984	0.00778654	0.0891753	GALR3	galanin receptor 3 [Source:HGNC Symbol;Acc:4134]
ENSCPOG00000000939	1.32254	0.256765	2.38831	9.30156	3.21747	0.0078027	0.0892993	PAX2	paired box 2 [Source:HGNC Symbol;Acc:8616]
ENSCPOG00000024192	1.32347	0.337942	2.309	6.83256	2.77243	0.00780955	0.0893168	UPK3B	uroplakin 3B [Source:HGNC Symbol;Acc:21444]
ENSCPOG00000003138	48.9411	34.3576	63.5246	1.84892	0.886684	0.00783808	0.0895818
ENSCPOG00000027332	2221.29	1664.36	2778.22	1.66924	0.739192	0.00785028	0.0896601	ISYNA1	inositol-3-phosphate synthase 1 [Source:HGNC Symbol;Acc:29821]
ENSCPOG00000022571	32.9537	21.2839	44.6235	2.09659	1.06804	0.00787509	0.0898822	PSMC3IP	PSMC3 interacting protein [Source:HGNC Symbol;Acc:17928]
ENSCPOG00000004038	1304.77	832.216	1777.33	2.13566	1.09468	0.00791645	0.0902928	APOD_CAVPO	Apolipoprotein D [Source:UniProtKB/Swiss-Prot;Acc:P51909]
ENSCPOG00000004663	113.598	142.748	84.4489	0.591596	-0.757315	0.0079382	0.0904793	MEST	mesoderm specific transcript homolog (mouse) [Source:HGNC Symbol;Acc:7028]
ENSCPOG00000008432	2193.83	1779.03	2608.64	1.46632	0.552204	0.00801221	0.0912608	RPL11	ribosomal protein L11 [Source:HGNC Symbol;Acc:10301]
ENSCPOG00000007374	556.2	440.359	672.04	1.52612	0.609867	0.00811629	0.0923835	MVP	major vault protein [Source:HGNC Symbol;Acc:7531]
ENSCPOG00000021338	2.371	0.822482	3.91952	4.76548	2.25262	0.0081603	0.0928213
ENSCPOG00000015219	1981.72	1670.69	2292.74	1.37233	0.45663	0.00823103	0.0935624	INF2	inverted formin, FH2 and WH2 domain containing [Source:HGNC Symbol;Acc:23791]
ENSCPOG00000009312	235.266	193.619	276.913	1.4302	0.516216	0.00826507	0.0938856
ENSCPOG00000003556	267.666	312.106	223.226	0.715225	-0.483531	0.00829876	0.0942044	TDRKH	tudor and KH domain containing [Source:HGNC Symbol;Acc:11713]
ENSCPOG00000013818	7.7056	4.78718	10.624	2.21926	1.15008	0.00832173	0.0943877	LIPH	lipase, member H [Source:HGNC Symbol;Acc:18483]
ENSCPOG00000026279	270.983	218.87	323.095	1.4762	0.561885	0.00832617	0.0943877	CKAP4	cytoskeleton-associated protein 4 [Source:HGNC Symbol;Acc:16991]
ENSCPOG00000010463	581.017	478.808	683.226	1.42693	0.512915	0.00833252	0.0943958	RFTN2	raftlin family member 2 [Source:HGNC Symbol;Acc:26402]
ENSCPOG00000001858	56.498	39.3004	73.6957	1.87519	0.907037	0.00834517	0.0944614	A4GALT	alpha 1,4-galactosyltransferase [Source:HGNC Symbol;Acc:18149]
ENSCPOG00000026081	17.6316	9.76517	25.4981	2.61112	1.38467	0.00834959	0.0944614
ENSCPOG00000001690	43.4225	53.3769	33.4681	0.627015	-0.673429	0.00835653	0.0944761	C2orf81	chromosome 2 open reading frame 81 [Source:HGNC Symbol;Acc:34350]
ENSCPOG00000011267	92.9832	62.6022	123.364	1.9706	0.978638	0.00841565	0.0950803	FREM1	FRAS1 related extracellular matrix 1 [Source:HGNC Symbol;Acc:23399]
ENSCPOG00000013508	421.798	479.989	363.606	0.75753	-0.400625	0.00842302	0.0950996	COG7	component of oligomeric golgi complex 7 [Source:HGNC Symbol;Acc:18622]
ENSCPOG00000012363	270.01	316.769	223.25	0.704773	-0.50477	0.00844848	0.0953227	ARAP3	ArfGAP with RhoGAP domain, ankyrin repeat and PH domain 3 [Source:HGNC Symbol;Acc:24097]
ENSCPOG00000020400	872.243	734.017	1010.47	1.37663	0.46114	0.00845692	0.0953538	NT5DC3	5'-nucleotidase domain containing 3 [Source:HGNC Symbol;Acc:30826]
ENSCPOG00000013578	1000.99	828.911	1173.07	1.4152	0.501003	0.00848418	0.0955498
ENSCPOG00000027388	26.0848	9.61767	42.5519	4.42435	2.14547	0.00848571	0.0955498
ENSCPOG00000001776	4.08343	6.19517	1.9717	0.318263	-1.65171	0.00853313	0.0960192
ENSCPOG00000004483	76.5613	45.3501	107.773	2.37646	1.24881	0.00859129	0.0966088	CLIC3	chloride intracellular channel 3 [Source:HGNC Symbol;Acc:2064]
ENSCPOG00000025210	6.12874	2.82997	9.42751	3.33131	1.73609	0.00859711	0.0966093	SMTNL1	smoothelin-like 1 [Source:HGNC Symbol;Acc:32394]
ENSCPOG00000013372	6.13141	2.87079	9.39203	3.27158	1.70999	0.00860662	0.0966417	STAG3L3	stromal antigen 3-like 3 [Source:HGNC Symbol;Acc:33845]
ENSCPOG00000005939	187.707	223.384	152.03	0.68058	-0.555164	0.00861153	0.0966417	DNMBP	dynamin binding protein [Source:HGNC Symbol;Acc:30373]
ENSCPOG00000026480	2.86753	0.930916	4.80415	5.16067	2.36756	0.00863636	0.096797	HSPB9	heat shock protein, alpha-crystallin-related, B9 [Source:HGNC Symbol;Acc:30589]
ENSCPOG00000008247	1098.57	916.999	1280.14	1.39601	0.48131	0.00863692	0.096797	DAAM2	dishevelled associated activator of morphogenesis 2 [Source:HGNC Symbol;Acc:18143]
ENSCPOG00000002769	84.4606	100.453	68.4677	0.681587	-0.553031	0.0086573	0.0969606	ZMYND10	zinc finger, MYND-type containing 10 [Source:HGNC Symbol;Acc:19412]
ENSCPOG00000027549	4.23229	6.79093	1.67365	0.246454	-2.02061	0.00869836	0.0973079	DRAM1	DNA-damage regulated autophagy modulator 1 [Source:HGNC Symbol;Acc:25645]
ENSCPOG00000026493	2.57295	4.01218	1.13372	0.28257	-1.82332	0.00869992	0.0973079	CCL14	chemokine (C-C motif) ligand 14 [Source:HGNC Symbol;Acc:10612]
ENSCPOG00000010389	194.922	243.275	146.569	0.602481	-0.731013	0.00872755	0.0975518	NUP133	nucleoporin 133kDa [Source:HGNC Symbol;Acc:18016]
ENSCPOG00000021502	205.69	154.35	257.03	1.66524	0.735728	0.00874639	0.0976972
ENSCPOG00000004965	49.3636	63.3712	35.3561	0.55792	-0.841869	0.00875815	0.0977633
ENSCPOG00000003015	529.41	606.775	452.045	0.744996	-0.424695	0.00877432	0.0978787	YIPF1	Yip1 domain family, member 1 [Source:HGNC Symbol;Acc:25231]
ENSCPOG00000023382	543.467	468.508	618.425	1.31999	0.400525	0.00878735	0.0979588
ENSCPOG00000002282	113.522	92.8241	134.221	1.44597	0.532035	0.00882019	0.0982595	JMJD5	jumonji domain containing 5 [Source:HGNC Symbol;Acc:25840]
ENSCPOG00000013589	225.212	179.91	270.514	1.50361	0.588427	0.00887897	0.0988486	NQO2	NAD(P)H dehydrogenase, quinone 2 [Source:HGNC Symbol;Acc:7856]
ENSCPOG00000026305	0.978762	0.101206	1.85632	18.342	4.19708	0.00890557	0.0990789
ENSCPOG00000013017	867.023	1051.65	682.396	0.648881	-0.623973	0.0089412	0.0993878	SCN9A	sodium channel, voltage-gated, type IX, alpha subunit [Source:HGNC Symbol;Acc:10597]
ENSCPOG00000008696	127.609	102.725	152.494	1.48448	0.56996	0.00895108	0.0993878	WDSUB1	WD repeat, sterile alpha motif and U-box domain containing 1 [Source:HGNC Symbol;Acc:26697]
ENSCPOG00000012198	82.4095	103.269	61.5499	0.596014	-0.746582	0.00895604	0.0993878	EIF2AK2	eukaryotic translation initiation factor 2-alpha kinase 2 [Source:HGNC Symbol;Acc:9437]
ENSCPOG00000002100	6.11269	9.71324	2.51215	0.258631	-1.95103	0.00895706	0.0993878	CLTR1_CAVPO	Cysteinyl leukotriene receptor 1 [Source:UniProtKB/Swiss-Prot;Acc:Q2NNR5]
ENSCPOG00000013600	255.067	181.338	328.796	1.81317	0.858514	0.00897267	0.099495	COTL1	coactosin-like 1 (Dictyostelium) [Source:HGNC Symbol;Acc:18304]
ENSCPOG00000007350	102.549	64.3028	140.794	2.18955	1.13063	0.00901295	0.0998757	THPO	thrombopoietin [Source:HGNC Symbol;Acc:11795]
ENSCPOG00000020263	83.3159	63.1926	103.439	1.63689	0.710956	0.00902615	0.0999558	MYCN	v-myc myelocytomatosis viral related oncogene, neuroblastoma derived (avian) [Source:HGNC Symbol;Acc:7559]

## Sheet: Rat
id	baseMean	baseMeanA	baseMeanB	foldChange	log2FoldChange	pval	padj	Associated.Gene.Name	Description_Ensembl	Additional_information
ENSRNOG00000003349	147.245	240.032	54.4589	0.226882	-2.13998	6.9186e-14	7.57464e-10	Col23a1	Collagen alpha-1(XXIII) chain [Source:UniProtKB/Swiss-Prot;Acc:Q810Y4]	ENCODES a protein that exhibits heparin binding; protein homodimerization activity; INVOLVED IN protein homotrimerization
ENSRNOG00000019338	13.7635	0.594732	26.9323	45.2848	5.50096	7.84693e-14	7.57464e-10	Dll3	Delta-like protein 3 [Source:UniProtKB/Swiss-Prot;Acc:O88671]	ENCODES a protein that exhibits Notch binding; INVOLVED IN central nervous system development; negative regulation of Notch signaling pathway; negative regulation of astrocyte differentiation
ENSRNOG00000033402	23.244	1.98563	44.5023	22.4121	4.48621	1.50176e-12	9.66434e-09	LOC501110	Glutathione S-transferase A6 [Source:UniProtKB/Swiss-Prot;Acc:Q6AXY0]	ENCODES a protein that exhibits glutathione transferase activity (orthology); INVOLVED IN glutathione metabolic process
ENSRNOG00000017286	32.8348	54.9858	10.6839	0.194303	-2.36362	1.40702e-10	6.79097e-07	HYES_RAT	Epoxide hydrolase 2 [Source:UniProtKB/Swiss-Prot;Acc:P80299]	ENCODES a protein that exhibits 4-nitrophenylphosphatase activity; epoxide hydrolase activity; magnesium ion binding; INVOLVED IN inflammatory response; linoleic acid metabolic process; positive regulation of blood pressure;
ENSRNOG00000010437	77.7068	121.767	33.6471	0.276324	-1.85557	6.37604e-10	2.46192e-06	Sncg	Gamma-synuclein [Source:UniProtKB/Swiss-Prot;Acc:Q63544]	ENCODES a protein that exhibits alpha-tubulin binding; beta-tubulin binding; INVOLVED IN aggressive behavior; cellular response to hydrostatic pressure; response to cocaine; pinhasov: higher in dominant rats, PMID:15660669
ENSRNOG00000039463	29.2306	47.4281	11.0332	0.232629	-2.1039	1.83208e-09	5.89501e-06	Pcdhga1	protocadherin gamma-A1 [Source:RefSeq peptide;Acc:NP_001032217]	ENCODES a protein that exhibits calcium ion binding (inferred); INVOLVED IN homophilic cell adhesion (inferred); FOUND IN membrane (ortholog)
ENSRNOG00000009466	20.3615	31.9109	8.81218	0.27615	-1.85648	9.38019e-08	0.000258706	Unc45b	protein unc-45 homolog B [Source:RefSeq peptide;Acc:NP_001100498]	ENCODES a protein that exhibits Hsp90 protein binding (orthology); INVOLVED IN chaperone-mediated protein folding (ortholog)
ENSRNOG00000020883	24.0133	11.046	36.9806	3.34787	1.74325	1.39851e-07	0.000337495	Dhdh	Uncharacterized protein [Source:UniProtKB/TrEMBL;Acc:D4A903]	dihydrodiol dehydrogenase	This gene encodes an enzyme that belongs to the family of dihydrodiol dehydrogenases, which exist in multiple forms in mammalian tissues and are involved in the metabolism of xenobiotics and sugars. These enzymes catalyze the NADP1-linked oxidation of transdihydrodiols of aromatic hydrocarbons to corresponding catechols. This enzyme is a dimeric dihydrodiol dehydrogenase, and it differs from mono…	ENCODES a protein that exhibits D-xylose 1-dehydrogenase (NADP+) activity (orthology); INVOLVED IN D-xylose catabolic process (ortholog); oxidation-reduction process (ortholog);
ENSRNOG00000019504	45.6288	66.5114	24.7462	0.37206	-1.42639	4.2517e-07	0.000912036	ARHL1_RAT	Growth hormone-regulated TBC protein 1 [Source:UniProtKB/Swiss-Prot;Acc:Q4QQU7]
ENSRNOG00000002911	31.0403	47.0196	15.0609	0.320312	-1.64245	4.81663e-07	0.000929899	Alb	Serum albumin [Source:UniProtKB/Swiss-Prot;Acc:P02770]
ENSRNOG00000006782	3.92406	0.756279	7.09184	9.37728	3.22917	1.47798e-06	0.00259398	RGD1560028		ENCODES a protein that exhibits neuropeptide Y receptor activity (inferred)
ENSRNOG00000021412	36.1628	52.026	20.2995	0.39018	-1.35779	3.89516e-06	0.00626667	Slfn8	schlafen family member 13 [Source:RefSeq peptide;Acc:NP_001013992]	ENCODES a protein that exhibits ATP binding (inferred)
ENSRNOG00000027295	148.617	197.773	99.4613	0.502906	-0.991638	5.76979e-06	0.00856859	Aph1b	gamma-secretase subunit APH-1B [Source:RefSeq peptide;Acc:NP_001040555]	ENCODES a protein that exhibits endopeptidase activity (orthology); peptidase activity (orthology); INVOLVED IN metabolic process (ortholog); protein processing (ortholog);
ENSRNOG00000030318	145.317	101.164	189.471	1.87292	0.905286	9.89312e-06	0.0136426	Gpr83	probable G-protein coupled receptor 83 [Source:RefSeq peptide;Acc:NP_536336]	ENCODES a protein that exhibits neuropeptide Y receptor activity (inferred); INVOLVED IN response to glucocorticoid stimulus (ortholog)
ENSRNOG00000011648	55.9926	77.6605	34.3247	0.441984	-1.17793	1.39405e-05	0.0169043	Aqp1	Aquaporin-1 [Source:UniProtKB/Swiss-Prot;Acc:P29975]	ENCODES a protein that exhibits glycerol transmembrane transporter activity; water channel activity; ammonia transmembrane transporter activity (orthology); INVOLVED IN glycerol transport; hyperosmotic response; hyperosmotic salinity response
ENSRNOG00000022796	62.7301	40.5889	84.8714	2.091	1.0642	1.40096e-05	0.0169043	Fgfbp3	fibroblast growth factor-binding protein 3 [Source:RefSeq peptide;Acc:NP_001102635]	ENCODES a protein that exhibits fibroblast growth factor binding (orthology); heparin binding (orthology); INVOLVED IN positive regulation of fibroblast growth factor receptor signaling pathway (ortholog); positive regulation of vascular permeability (ortholog)
ENSRNOG00000032609	80.7621	124.433	37.0912	0.298082	-1.74622	2.11077e-05	0.0229307		MT tRNA
ENSRNOG00000011600	12.4868	4.86077	20.1129	4.1378	2.04886	2.13795e-05	0.0229307	Opn4	Melanopsin [Source:UniProtKB/Swiss-Prot;Acc:Q8R456]	ENCODES a protein that exhibits G-protein coupled photoreceptor activity; 11-cis retinal binding (orthology); INVOLVED IN detection of visible light; phototransduction; G-protein coupled receptor signaling pathway (ortholog)
ENSRNOG00000002768	39.1371	24.4443	53.8298	2.20214	1.13891	2.68966e-05	0.0273298	Tmem114	transmembrane protein 114 [Source:RefSeq peptide;Acc:NP_001128110]
ENSRNOG00000008707	5.12564	1.47142	8.77986	5.96694	2.57699	2.86645e-05	0.0276699	Epx	eosinophil peroxidase [Source:RefSeq peptide;Acc:NP_001100507]	ENCODES a protein that exhibits heme binding (inferred); peroxidase activity (inferred); INVOLVED IN response to oxidative stress (inferred)
ENSRNOG00000022955	1.81765	0.14862	3.48669	23.4604	4.55215	3.44701e-05	0.0316895	Vom2r75	vomeronasal 2 receptor, 75 [Source:RefSeq peptide;Acc:NP_775442]
ENSRNOG00000015368	28.5163	9.57137	47.4612	4.95866	2.30995	3.81669e-05	0.0334932	Pdilt	Protein disulfide-isomerase-like protein of the testis [Source:UniProtKB/Swiss-Prot;Acc:Q5XI02]	ENCODES a protein that exhibits isomerase activity (inferred); INVOLVED IN cell differentiation (inferred); cell redox homeostasis (inferred); multicellular organismal development (inferred)
ENSRNOG00000015763	281.692	353.364	210.02	0.594345	-0.750628	5.9953e-05	0.050324	Cml3	Probable N-acetyltransferase CML3 [Source:UniProtKB/Swiss-Prot;Acc:Q9QXS4]
ENSRNOG00000017147	1.83	3.48823	0.171773	0.0492435	-4.34392	7.59324e-05	0.0610813	Trim6	tripartite motif-containing 6 [Source:RefSeq peptide;Acc:NP_001163932]	ENCODES a protein that exhibits zinc ion binding (inferred); INVOLVED IN protein trimerization (ortholog)
ENSRNOG00000031202	4.63188	7.64301	1.62075	0.212056	-2.23748	8.91256e-05	0.0646424	D4A0Y0_RAT	Uncharacterized protein [Source:UniProtKB/TrEMBL;Acc:D4A0Y0]
ENSRNOG00000037947	95.2072	125.331	65.0836	0.519294	-0.945376	9.02532e-05	0.0646424	D4A4J6_RAT	Uncharacterized protein [Source:UniProtKB/TrEMBL;Acc:D4A4J6]	LOC691658 similar to anterior pharynx defective 1b homolog	INVOLVED IN positive regulation of catalytic activity (inferred); protein processing (inferred)
ENSRNOG00000025005	3.51872	6.02872	1.00873	0.167321	-2.57931	9.20774e-05	0.0646424	RGD1560672	similar to novel protein (RGD1560672), mRNA [Source:RefSeq DNA;Acc:NM_001109073]
ENSRNOG00000018071	6.77918	10.7671	2.79122	0.259235	-1.94767	9.37526e-05	0.0646424	Q5RJS1_RAT	Olr35 protein [Source:UniProtKB/TrEMBL;Acc:Q5RJS1]	ENCODES a protein that exhibits G-protein coupled receptor activity (inferred); olfactory receptor activity (inferred); INVOLVED IN G-protein coupled receptor signaling pathway (inferred); detection of chemical stimulus involved in sensory perception of smell (inferred)
