# Supplementary material for: A Comparison of Brain Gene Expression Levels in Domesticated and Wild Animals
Source: PLoS Genet. 2012 Sep 27;8(9):e1002962. doi: 10.1371/journal.pgen.1002962 (PMC3459979; doi:10.1371/journal.pgen.1002962)
Supplement: Dataset S4 — Domestication-related genes. (XLSX) [file pgen.1002962.s004.xlsx]

## Sheet: SI_Dataset_S3_domestication_rel
gene	gene_name	rank	p_vsd_model	p_edgeR_model	p_FPKM_model	median_diff_dog_pig_rabbit	diff_guineapig
ENSCAFG00000000934	COL14A1	9	0.000108222	1.14948e-09	0.000108987	-0.721017	-0.264946
ENSCAFG00000008607	SOX6	31	0.000229953	2.37903e-07	0.000360824	-0.810791	-0.445375
ENSCAFG00000015233	PROM1	35	0.00031332	9.49208e-07	0.000209399	-0.823815	-0.660061
ENSCAFG00000015004	SOCS4	62	0.00018603	0.000456729	0.000177512	-0.489294	-0.298333
ENSCAFG00000006164	CYP1B1	64	0.0011863	4.91254e-06	0.000435521	-0.407868	-0.208544
ENSCAFG00000007846	Q53CL6_CANFA	69	0.00102262	0.000146428	0.000153044	-0.731762	-0.428323
ENSCAFG00000017090	SPATA20	75	0.000936603	3.66333e-08	0.0018233	0.895354	1.24468
ENSCAFG00000006073	POSTN	81	0.00222046	3.91578e-07	0.000729674	-1.20661	-0.530871
ENSCAFG00000010630	COBLL1	83	0.000670998	3.66075e-05	0.0010557	-0.589002	-0.296835
ENSCAFG00000008430	PAG1	85	0.000374054	0.000642393	0.000428452	-0.552106	-0.0692601
ENSCAFG00000011069	CXA5_CANFA	101	0.0025275	7.10368e-06	0.000884091	-0.901144	-0.541054
ENSCAFG00000013112	METRNL	108	0.00164066	2.31157e-05	0.00182737	0.916759	0.453331
ENSCAFG00000016603	ITGAL	112	0.00330669	2.92466e-07	0.00139479	-1.07231	-0.324199
ENSCAFG00000008670	PTK2B	117	4.74132e-05	0.00277773	0.00065176	0.795674	0.64398
ENSCAFG00000003037	WIPF3	117	0.00216321	0.000164206	0.00131226	1.05218	0.24301
ENSCAFG00000008799	C4orf43	129	0.00318841	9.11986e-05	0.000949926	-0.747436	-0.688378
ENSCAFG00000013079	OLFML2B	135	0.00204366	1.62438e-07	0.00392747	0.680946	0.10139
ENSCAFG00000013543	SWT1	143	0.00253192	0.000563146	0.00129624	-0.365042	-0.726793
ENSCAFG00000008602	CTSO	146	0.000939543	6.72576e-05	0.003903	-0.964084	-0.655535
ENSCAFG00000007406	TLR3	147	0.00401683	3.24998e-06	0.00219429	-0.352053	-0.843067
ENSCAFG00000013418	NFKBIA	158	0.000930437	1.62852e-05	0.00614813	1.0041	0.320819
ENSCAFG00000017357	ADAM19	160	0.0036337	0.00189998	0.000305173	-0.528969	-0.167024
ENSCAFG00000023602		161	0.00482344	0.000195352	0.00150964	-0.474683	-0.618206
ENSCAFG00000008880	PIK3AP1	172	0.000545699	0.0024532	0.00269948	-0.442534	-0.552502
ENSCAFG00000018572	HMGCS1	177	0.00259538	0.00384092	0.000451026	-0.600802	-0.936197
ENSCAFG00000003074	NOD1	180	0.000192171	6.48746e-05	0.00928729	0.650826	0.133309
ENSCAFG00000002835	LOC612462	186	0.00364922	0.000493263	0.00253835	-0.374654	-0.387388
ENSCAFG00000000693	ANGP1_CANFA	197	0.00604615	0.0002621	0.00183706	-0.538256	-0.106503
ENSCAFG00000008571	KCNH3	207	0.00392264	0.00124699	0.00255029	1.08575	0.917253
ENSCAFG00000020036	ENDOG	222	0.00443123	2.92292e-05	0.00642097	0.721348	1.40502
ENSCAFG00000013102	GLNA_CANFA	228	0.00057037	0.000283884	0.0124889	0.282592	0.220707
ENSCAFG00000005849	TBC1D5	236	0.00285062	0.00633778	0.00185113	-0.297454	-0.115075
ENSCAFG00000007034	LYN	243	0.00532377	0.00251389	0.00240435	-0.45162	-0.949158
ENSCAFG00000005703	BBS10	250	0.00227877	0.000786374	0.00960174	-0.529088	-0.695406
ENSCAFG00000017340	TOM1L1	255	0.00293525	0.00139587	0.00732438	-0.560937	-0.198829
ENSCAFG00000002171	Q6JDG6_CANFA	256	0.00558003	0.00322501	0.00242451	-0.180565	-0.273549
ENSCAFG00000009385	CHST1	257	0.00585806	0.000511303	0.00465047	0.767201	0.299009
ENSCAFG00000018418	RHBDL3	262	0.00308638	6.49874e-06	0.0136142	0.572418	0.303945
ENSCAFG00000013044	LIMK2	264	0.000174055	0.00868993	0.00576439	0.526385	0.320889
ENSCAFG00000014346	C1S	273	0.00674533	0.000923678	0.00434461	-0.562899	-0.452342
ENSCAFG00000002467	SNX13	276	0.00643801	0.00834703	0.000557732	-0.484708	-0.955565
ENSCAFG00000020030	CCBL1	278	0.00515189	0.00729896	0.00197248	0.535367	0.616063
ENSCAFG00000002015		279	0.000656671	0.0287764	0.000140574	-0.344776	-0.263014
ENSCAFG00000005819	SRA1	284	0.000129995	0.0244867	0.00171284	0.521943	0.376739
ENSCAFG00000018017	RNF138	289	0.00159172	0.00140201	0.013031	-0.345759	-0.416252
ENSCAFG00000008871	ANTXR2	293	0.00759856	0.00701501	0.00107083	-0.542578	-0.0331973
ENSCAFG00000000056	CDH7	317	0.00461565	0.0196701	0.000724129	-0.378382	-0.423442
ENSCAFG00000005006		319	0.00318134	0.00472631	0.00956319	0.745011	0.977149
ENSCAFG00000004842		331	0.00554298	0.00045544	0.0148273	0.714449	0.0972735
ENSCAFG00000016983	RAB8B	331	0.00993719	0.00332076	0.00380579	-0.0888193	-0.601101
ENSCAFG00000013522	AGPS	339	0.00560519	0.00463913	0.00762838	-0.387317	-0.676385
ENSCAFG00000020058	SNX7	340	0.00529167	0.00225739	0.0117761	-0.504659	-0.42496
ENSCAFG00000006522	B3GALTL	341	0.00678047	0.00562455	0.00452821	-0.385009	-0.300793
ENSCAFG00000013594	ZNF280B	343	0.00353381	0.0133079	0.00440455	-0.369433	-0.147513
ENSCAFG00000002818	IKBKAP	358	0.00421414	0.0333317	0.000105825	-0.190083	-0.616291
ENSCAFG00000001781	WFS1	358	0.00810936	8.92265e-05	0.0152036	0.673816	0.261635
ENSCAFG00000002129	PDK4	359	0.0120753	9.40574e-05	0.0109307	1.20707	0.112337
ENSCAFG00000002104	SGCE	367	0.000981237	0.0298	0.00365607	-0.2152	-0.1011
ENSCAFG00000005977	MGAT4C	368	0.00613985	0.000639571	0.0157679	-0.258447	-0.127309
ENSCAFG00000025365	DARC	369	0.00250669	3.05275e-05	0.0263911	0.898727	0.485664
ENSCAFG00000010896	ARRDC4	374	0.00675451	0.0114134	0.00398999	-0.269766	-0.342907
ENSCAFG00000015073	ATL3	379	0.00230799	0.0253862	0.00423773	-0.497965	-0.660534
ENSCAFG00000001878	GABRG1	381	0.0146839	0.00870726	0.00170669	-0.827698	-1.03319
ENSCAFG00000010801	SLC9B2	382	0.0140092	0.00930258	0.00193896	-0.376073	-0.379047
ENSCAFG00000007101	SPRYD3	392	0.00403196	0.0178977	0.00624079	0.347608	0.227623
ENSCAFG00000003399	TES_CANFA	410	0.00587277	0.0282369	0.00215192	-0.43685	-0.0914787
ENSCAFG00000001051	CSDC2	421	0.00229566	1.80261e-05	0.0369584	0.78128	1.38623
ENSCAFG00000000131	GLS2	426	0.00549509	0.0191824	0.00739131	0.356626	0.0793573
ENSCAFG00000002001	Q95L28_CANFA	428	0.00274509	0.0477218	0.00163804	-0.388115	-0.543573
ENSCAFG00000010345	PVRL3	429	0.015568	0.00568019	0.00497963	-0.491619	-0.51383
ENSCAFG00000009216	TBX3	430	0.00836979	0.00138623	0.0180608	-0.312539	-0.130782
ENSCAFG00000008669	TMEM144	436	0.0131478	0.00100535	0.0150768	-0.395309	-1.07383
ENSCAFG00000001403	NP_001018645.1	439	0.0122288	0.01404	0.00372455	-0.525382	-0.73196
ENSCAFG00000002396	ANKRD39	452	0.0339002	0.00290743	0.00209032	0.453605	1.47964
ENSCAFG00000005984	KDELC1	472	0.0139718	0.012677	0.00700417	-0.182795	-0.297749
ENSCAFG00000006534	VPS16	477	0.00116095	0.0432938	0.00786624	0.447197	0.281162
ENSCAFG00000015388	SAMD8	478	0.0114158	0.0193636	0.00542026	-0.621842	-0.625601
ENSCAFG00000009418	TP53INP1	481	0.0199761	0.00500244	0.00894807	-0.374281	-0.610227
ENSCAFG00000013660	BRMS1L	495	0.00823411	0.0272693	0.00724114	-0.271748	-0.220771
ENSCAFG00000010402	KCNT2	498	0.0117859	0.0319791	0.00248613	-0.437573	-0.635362
ENSCAFG00000009517	HMGCR	498	0.0119358	0.0307183	0.00262636	-0.438201	-0.523835
ENSCAFG00000000482	FLT4	501	0.023558	0.0125394	0.00345273	-0.386361	-0.603401
ENSCAFG00000013981	RALGPS2	503	0.0187228	0.0165124	0.00367207	-0.475538	-0.657432
ENSCAFG00000011513	ABLIM1	515	0.004969	0.0494749	0.00401794	-0.179105	-0.099869
ENSCAFG00000001782	MRPL2	516	0.00566424	0.0296762	0.0114345	0.24936	0.206254
ENSCAFG00000011108	GNA13	522	0.0119139	0.0132198	0.0130443	-0.254785	-0.535937
ENSCAFG00000017817	MCART6	523	0.00338287	0.00559193	0.033172	-0.353474	-0.391014
ENSCAFG00000014737	CALCRL	525	0.0299148	0.000963805	0.0127864	-0.431052	-1.0731
ENSCAFG00000006019	FREM2	528	0.0073774	0.00607068	0.0247745	-0.429418	-0.983096
ENSCAFG00000017049	PANK3	531	0.0252548	0.0139122	0.00385582	-0.481564	-0.177529
ENSCAFG00000014058	CCDC50	535	0.0231183	0.0201271	0.00334033	-0.0723591	-0.515029
ENSCAFG00000013006	ITGA6	541	0.0206144	0.0055528	0.0148116	-0.583381	-0.79093
ENSCAFG00000013597	ST7L	554	0.006509	0.0213914	0.0172515	-0.333683	-0.262354
ENSCAFG00000001563	HSF1	557	0.00819082	0.011612	0.0222812	0.691006	0.273693
ENSCAFG00000018394	ARL15	557	0.0224965	0.0126425	0.00928841	-0.409164	-0.044099
ENSCAFG00000010963	MRPS35	558	0.00849395	0.0166901	0.0181274	-0.212917	-0.236783
ENSCAFG00000001702	C9orf95	565	0.0293577	0.0069774	0.00991409	-0.406658	-0.217384
ENSCAFG00000019964	DNAAF1	568	0.010869	0.00443896	0.0280805	0.361405	0.35717
ENSCAFG00000008857	CACNB3	572	0.0097847	0.0229588	0.0152174	0.66517	0.238777
ENSCAFG00000000334	ADAMTS2	573	0.00953907	0.00131262	0.0387595	0.393385	0.179135
ENSCAFG00000019895	TTF1	579	0.0167025	0.0461039	0.0017497	-0.237597	-0.651781
ENSCAFG00000012718	CPXM2	593	0.0122424	0.00355464	0.0298607	0.415802	0.947047
ENSCAFG00000016166	TMEM216	595	0.0213866	0.0224419	0.00783023	0.319424	0.545665
ENSCAFG00000010053	ANO5	605	0.0149777	0.0268088	0.012401	-0.323539	-0.22094
ENSCAFG00000012545	ALS2CR8	609	0.0077487	0.042938	0.0125239	-0.174432	-0.386299
ENSCAFG00000008101	PLOD2	609	0.0314936	0.00116688	0.0209315	-0.507398	-0.179484
ENSCAFG00000010304	A1XFH2_CANFA	612	0.0144021	0.0278386	0.0129865	-0.0839077	-0.656823
ENSCAFG00000003616	FAM131B	613	0.00434002	0.0232988	0.0282771	0.471811	0.418581
ENSCAFG00000005327	TGDS	613	0.0182902	0.00206351	0.0285529	-0.489802	-0.542569
ENSCAFG00000000307	PEX3	619	0.0311111	0.0169103	0.00828027	-0.177947	-0.108991
ENSCAFG00000002765	UBA6	634	0.0120868	0.0141028	0.0241986	-0.80334	-0.492951
ENSCAFG00000002046	GNG11	638	0.0105365	0.00178009	0.0496427	-0.523337	-0.263756
ENSCAFG00000013744	C1orf27	649	0.0166841	0.0138182	0.0217437	-0.255221	-0.657151
ENSCAFG00000010592	DNAJB14	649	0.0226354	0.017439	0.0159386	-0.670881	-0.290065
ENSCAFG00000014055	EXOSC7	651	0.0170225	0.0328593	0.0118593	0.354732	0.327187
ENSCAFG00000002621	OGFRL1	652	0.028988	0.00760669	0.0187196	-0.371981	-0.401374
ENSCAFG00000015576	FKBP4	653	0.00127069	0.0329331	0.0368446	0.312571	0.365857
ENSCAFG00000008064	FAM172A	665	0.023811	0.0106714	0.0209671	-0.383202	-0.0911954
ENSCAFG00000001827	CROT	677	0.0281107	0.0079925	0.0220952	-0.263975	-0.778367
ENSCAFG00000006051	Q2KM13_CANFA	683	0.028754	0.000943485	0.0346503	-0.631763	-0.607462
ENSCAFG00000018589	OXCT1	692	0.00935968	0.0414057	0.0194583	-0.295259	-1.34179
ENSCAFG00000003026	NUDCD3	695	0.00613037	0.0257403	0.0357116	0.477668	0.258838
ENSCAFG00000015334	AP3M1	696	0.0161768	0.0331794	0.0164277	-0.415833	-0.185268
ENSCAFG00000008735	MOB1A	698	0.0374716	0.0260751	0.00817986	-0.498728	-0.219623
ENSCAFG00000014594	ABHD12B	704	0.0388862	0.000260599	0.0327772	-0.233855	-2.22418
ENSCAFG00000003848	C4orf29	708	0.0206258	0.0188289	0.0232777	-0.217448	-0.0865228
ENSCAFG00000011688	TRUB1	710	0.0141933	0.0178932	0.0307291	-0.284756	-0.24864
ENSCAFG00000015249	MUDENG	720	0.0244871	0.0338647	0.014042	-0.324885	-0.833198
ENSCAFG00000007821	YPEL4	727	0.0275485	0.0109905	0.0268119	0.495061	0.869565
ENSCAFG00000006729	OGDHL	738	0.0103968	0.0276893	0.034589	0.477798	0.671178
ENSCAFG00000001075	ACO2	740	0.0203452	0.0445152	0.0146406	0.543268	0.668681
ENSCAFG00000006163	EEA1	745	0.0316608	0.0152446	0.0226246	-0.525272	-0.310349
ENSCAFG00000000296	GPR126	759	0.0427985	0.00529825	0.0254303	-0.248282	-0.902306
ENSCAFG00000004393	TMEM135	767	0.0335191	0.0434701	0.0104788	-0.210004	-0.0586643
ENSCAFG00000017308	STON2	769	0.0432029	0.00348779	0.0286276	-0.396314	-0.351148
ENSCAFG00000012387	C2orf77	779	0.0459225	0.0239438	0.0128339	-0.311104	-0.927178
ENSCAFG00000012056	ZSCAN29	797	0.0173374	0.0364687	0.0254561	-0.228598	-0.217479
ENSCAFG00000009603	SLC35B3	829	0.0476402	0.014368	0.022893	-0.224468	-0.629751
ENSCAFG00000017760	CDKN2D	845	0.0397166	0.00562388	0.0457785	0.858495	0.468544
ENSCAFG00000018930	GIT1	866	0.0216137	0.0421653	0.0298567	0.454674	0.00900509
ENSCAFG00000016200	TCF12	875	0.0333844	0.0347438	0.0267957	-0.37973	-0.2419
ENSCAFG00000003080	ORC3	880	0.0347566	0.0404452	0.0235551	-0.321589	-0.345432
ENSCAFG00000015237	EXOC5	908	0.0262428	0.0349457	0.0382038	-0.259426	-0.480814
ENSCAFG00000007008	RAB3C	925	0.0382705	0.0348276	0.0297302	-0.311253	-0.322437
ENSCAFG00000010336	MTMR10	931	0.0429586	0.0387359	0.0238809	-0.204927	-0.0205817
ENSCAFG00000005702	TOP2B	991	0.0445331	0.0300186	0.0394091	-0.46381	-0.130459
ENSCAFG00000004083	CCDC82	996	0.0448519	0.0221084	0.0485836	-0.451568	-0.676224
ENSCAFG00000020426	LRRC7	999	0.0330297	0.0471696	0.041275	-0.228231	-0.0413821
ENSCAFG00000010080	MYO1B	999	0.0351979	0.0409782	0.0441016	-0.666965	-0.359228
ENSCAFG00000014685	C1orf9	1083	0.0400502	0.0495121	0.0488582	-0.665155	-0.482772
